# Supplementary material for: Chemo- and regio-divergent access to fluorinated 1-alkyl and 1-acyl triazenes from alkynyl triazenes
Source: Royal Society of Chemistry journal article supplement (doi:10.1039/d2sc00294a), 2022-01-01
Supplement: d2sc00294a1.pdf [file d2sc00294a1.pdf]

# Chemo- and Regio-divergent Access to Fluorinated 1-Alkyl and 1-Acyl Triazenes from Alkynyl Triazenes

Jin-Fay Tan,<sup>[a]</sup> Carl Thomas Bormann,<sup>[b]</sup> Kay Severin<sup>[b]</sup> and Nicolai Cramer\*<sup>[a]</sup>

---

a. Laboratory of Asymmetric Catalysis and Synthesis, EPFL SB ISIC LCSA, BCH 430, CH-1015 Lausanne

(Switzerland). E-mail: nicolai.cramer@epfl.ch

b. Laboratory of Supramolecular Chemistry, EPFL SB ISIC LCS, BCH 3307, CH-1015 Lausanne (Switzerland).

## Supporting Information

### Table of Content:

|                                                                                               |     |
|-----------------------------------------------------------------------------------------------|-----|
| General Methods                                                                               | S2  |
| Preparation of 1-Alkynyl Triazenes Substrates                                                 | S3  |
| General Procedure <b>A</b> for the Synthesis of 1,1,2,2-Tetrafluoroethyl Triazenes <b>2</b>   | S4  |
| General Procedure <b>B</b> for the Synthesis of $\alpha$ -Difluoro Triazenyl Ketones <b>3</b> | S8  |
| General Procedure <b>C</b> for the Synthesis of $\alpha$ -Difluoro Acyl Triazenes <b>6</b>    | S13 |
| Product Derivatizations                                                                       | S18 |
| Control Experiments                                                                           | S19 |
| X-ray Structures                                                                              | S21 |
| NMR Spectra                                                                                   | S30 |
| References                                                                                    | S83 |

## 1. General Methods:

All reactions were carried out under an atmosphere of dry nitrogen or nitrous oxide (purity: 99.999%, Messer Schweiz AG) using standard Schlenk or glovebox techniques in oven-dried glassware with magnetic stirring, unless otherwise indicated. Reagents and solvents were purchased from Aldrich, Acros, Alfa Aesar, Abcr, or TCI. Chemicals were used as obtained from the suppliers. Dry THF was obtained using a solvent purification system with an aluminum oxide column (Innovative Technologies). Falcon tubes used are 14 mL non-pyrogenic polypropylene round-bottomed tubes, (17 x 100 mm), purchased from Corning Science México S.A. De C.V.

Flash chromatography was performed with Silicycle silica gel 60 (0.040-0.063  $\mu\text{m}$  grade) or basic alumina (Acros, Brockmann activity 1, 50-200  $\mu\text{m}$ , 60A). Analytical thin-layer chromatography was performed with commercial glass plates coated with 0.25 mm silica gel (E. Merck, Kieselgel 60 F254). Compounds were either visualised under UV-light at 254 nm or by dipping the plates in an aqueous potassium permanganate solution followed by heating. For the purification of acid sensitive compounds, silicagel 230-400 mesh particle size (100 g) was deactivated prior to use by adding dichloromethane containing 5 vol% triethylamine (300 mL), removal of the solvent under reduced pressure, and drying of the silica at room temperature under oil pump vacuum overnight.

NMR spectra were recorded on a Bruker Avance 400 spectrometer with a BBFOz ATMA probe and Bruker DRX600 (600 MHz) spectrometer. Chemical shifts ( $\delta$ ) are reported in parts per million (ppm) relative to residual chloroform (s, 7.26 ppm). Splitting patterns are designated as s, singlet; d, doublet; t, triplet; q, quartet; sept, septet; m, multiplet; brs, broad singlet. Proton decoupled Carbon-13 nuclear magnetic resonance ( $^{13}\text{C}$  NMR) data were acquired at 101 MHz on a Bruker AV400 spectrometer. Chemical shifts are reported in ppm relative to  $\text{CDCl}_3$  (77.16 ppm).

Electrospray-ionisation HRMS data were acquired on a Q-Tof Ultima mass spectrometer (Waters) or an Agilent LC-MS TOF. High resolution mass are given in  $m/z$ . Data from the Lock-Spray were used to calculate a correction factor for the mass scale and provide accurate mass information of the analyte. Data were processed using the MassLynx 4.1 software. IR spectra were recorded on a Perkin-Elmer FT-IR spectrometer. Absorbance frequencies are reported in reciprocal centimeters ( $\text{cm}^{-1}$ ).

## 2. Preparation of 1-Alkynyl Triazenes Substrates

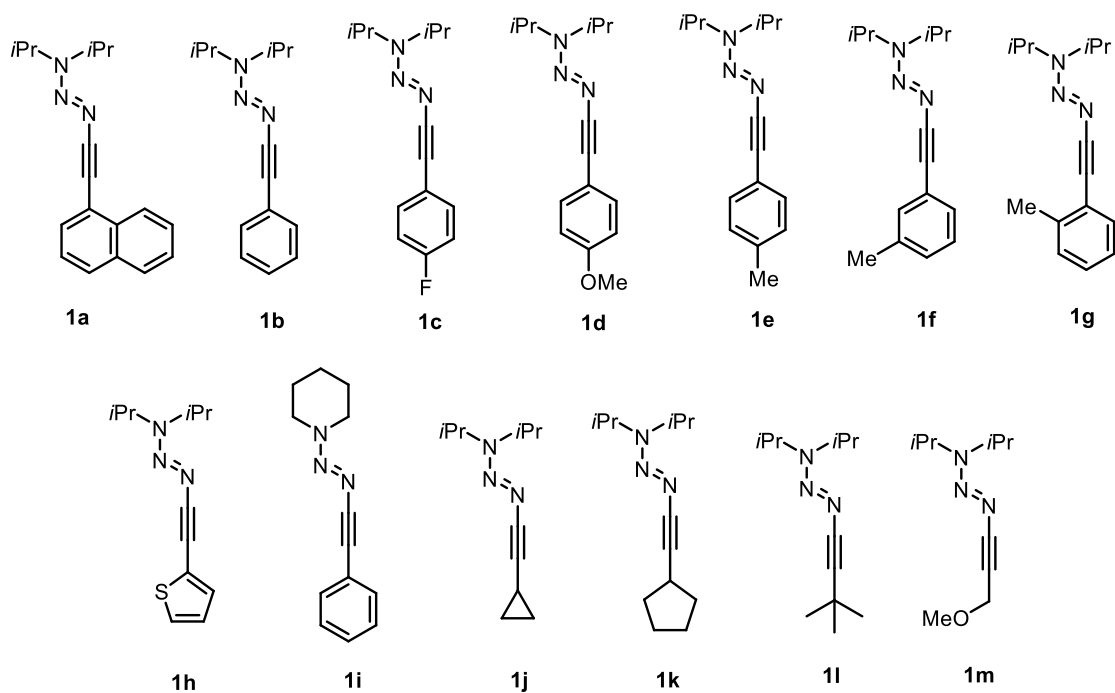

All 1-alkynyl triazenes were previously reported and synthesized by reaction of lithium amides with  $N_2O$  and alkynyl Grignard reagents as described in the literature.<sup>1,2</sup> The spectra were in good agreement with the reported data.

### 3. General Procedure A for the Synthesis of 1,1,2,2-Tetrafluoroethyl Triazenes 2:

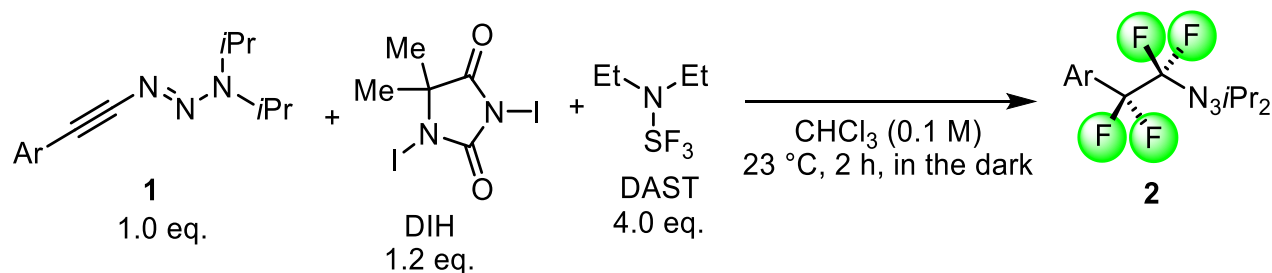

**General Procedure A:** Alkynyl triazene **1** (0.10 mmol, 1.0 eq.) and DIH (0.12 mmol, 45.6 mg, 1.2 eq.) were weighed in Falcon tube containing a magnetic stirring bar. Addition of CHCl<sub>3</sub> (1.0 mL) at RT was immediately followed by addition of DAST (0.40 mmol, 52.8  $\mu$ L, 4.0 eq.) *via* a micro pipette. The mixture was stirred at RT for 2 h, in the dark with aluminium foil.

After completion of reaction, the mixture was concentrated under reduced pressure. Crude was then purified by silica gel chromatography eluting with pentane/EtOAc to afford the 1,1,2,2-tetrafluoroethyl triazene product **2**.

#### (E)-3,3-diisopropyl-1-(1,1,2,2-tetrafluoro-2-(naphthalen-1-yl)ethyl)triaz-1-ene (**2a**):

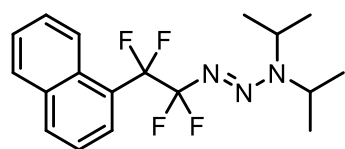

Obtained as yellow solid in 87 % yield (28.9 mg), <sup>1</sup>H NMR (400 MHz, CDCl<sub>3</sub>)  $\delta$  (ppm) = 8.38–8.30 (m, 1H), 7.94 (d, *J* = 8.2 Hz, 1H), 7.85 (dd, *J* = 8.0, 1.8 Hz, 1H), 7.79 (d, *J* = 7.4 Hz, 1H), 7.55–7.45 (m, 3H), 4.95 (m, 1H), 3.82 (m, 1H), 1.08 (d, *J* = 6.8 Hz, 6H), 1.02 (d, *J* = 6.6 Hz, 6H); <sup>13</sup>C NMR (101 MHz, CDCl<sub>3</sub>)  $\delta$  (ppm) = 134.2, 132.0, 130.6, 128.7, 127.9 (t, <sup>2</sup>*J*<sub>C-F</sub> = 22.5 Hz), 127.8 (t, <sup>3</sup>*J*<sub>C-F</sub> = 9.5 Hz), 126.8, 126.3 (t, <sup>3</sup>*J*<sub>C-F</sub> = 6.4 Hz), 125.8, 124.3, 118.8 (tt, <sup>1</sup>*J*<sub>C-F</sub> = 261.1, 31.9 Hz), 118.4 (tt, <sup>1</sup>*J*<sub>C-F</sub> = 254.1, 38.3 Hz), 50.0, 47.2, 23.0, 18.8; <sup>19</sup>F NMR (376 MHz, CDCl<sub>3</sub>)  $\delta$  (ppm) = -97.8 (t, *J* = 7.8 Hz), -105.7 (t, *J* = 7.9 Hz); IR (ATR):  $\tilde{\nu}$  1755, 1539, 1358, 1210, 867, 770, 700, 582 cm<sup>-1</sup>; HRMS (ESI/QTOF) *m/z*: [M + H]<sup>+</sup> Calcd for C<sub>18</sub>H<sub>22</sub>F<sub>4</sub>N<sub>3</sub><sup>+</sup> 356.1744; Found 356.1738; R<sub>f</sub>: 0.60 (1:9 EtOAc/pentane).

#### (E)-3,3-diisopropyl-1-(1,1,2,2-tetrafluoro-2-phenylethyl)triaz-1-ene (**2b**):

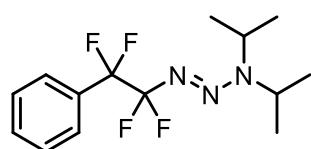

Obtained as yellow oil in 82 % yield (25.1 mg), <sup>1</sup>H NMR (400 MHz, CDCl<sub>3</sub>)  $\delta$  (ppm) = 7.59–7.54 (m, 2H), 7.46–7.36 (m,



3H), 4.98 (m, 1H), 3.94 (m, 1H), 1.19 (d,  $J = 6.6$  Hz, 6H), 1.17 (d,  $J = 6.8$  Hz, 6H);  $^{13}\text{C}$  NMR (101 MHz,  $\text{CDCl}_3$ )  $\delta$  (ppm) = 132.1 (t,  $^2J_{\text{C-F}} = 24.4$  Hz), 130.5, 128.0, 126.9, 118.1 (tt,  $^1J_{\text{C-F}} = 261.6, 32.0$  Hz), 116.3 (tt,  $^1J_{\text{C-F}} = 254.9, 39.0$  Hz), 50.3, 47.2, 23.01, 18.7;  $^{19}\text{F}$  NMR (376 MHz,  $\text{CDCl}_3$ )  $\delta$  (ppm) = -99.0 (t,  $J = 6.5$  Hz), -112.6 (t,  $J = 6.5$  Hz); IR (ATR):  $\tilde{\nu}$  1743, 1545, 1360, 1210, 866, 770, 705, 580  $\text{cm}^{-1}$ ; HRMS (ESI/QTOF)  $m/z$ :  $[\text{M} + \text{H}]^+$  Calcd for  $\text{C}_{14}\text{H}_{20}\text{F}_4\text{N}_3^+$  306.1588; Found 306.1587;  $R_f$ : 0.29 (1:9 EtOAc/pentane).

(E)-3,3-diisopropyl-1-(1,1,2,2-tetrafluoro-2-(4-fluorophenyl)ethyl)triaz-1-ene (2c):

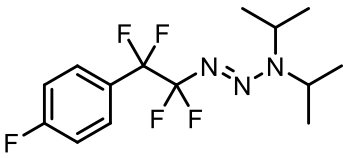 5.0 eq. DAST used. Obtained as yellow oil in 80 % yield (26.0 mg),  $^1\text{H}$  NMR (400 MHz,  $\text{CDCl}_3$ )  $\delta$  (ppm) = 7.55 (dd,  $J = 8.7, 5.3$  Hz, 2H), 7.10 (t,  $J = 8.6$  Hz, 2H), 4.97 (m, 1H), 3.96 (m, 1H), 1.22 (d,  $J = 6.6$  Hz, 6H), 1.17 (d,  $J = 6.8$  Hz, 6H);  $^{13}\text{C}$  NMR (101 MHz,  $\text{CDCl}_3$ )  $\delta$  (ppm) = 164.20 (d,  $^1J_{\text{C-F}} = 250.2$  Hz), 129.38–129.16 (m), 128.3 (t,  $^2J_{\text{C-F}} = 25.5$  Hz), 118.0 (tt), 116.2 (tt), 115.3 (d,  $^2J_{\text{C-F}} = 22.0$  Hz), 50.5, 47.4, 23.1, 18.8;  $^{19}\text{F}$  NMR (376 MHz,  $\text{CDCl}_3$ )  $\delta$  (ppm) = -98.9 (t,  $J = 6.4$  Hz), -110.2, -112.0 (t,  $J = 6.6$  Hz); IR (ATR):  $\tilde{\nu}$  2930, 1514, 1468, 1429, 1224, 1160, 1127, 1090, 1069, 839  $\text{cm}^{-1}$ ; HRMS (ESI/QTOF)  $m/z$ :  $[\text{M} + \text{H}]^+$  Calcd for  $\text{C}_{14}\text{H}_{19}\text{F}_5\text{N}_3^+$  324.1494; Found 324.1494;  $R_f$ : 0.61 (1:9 EtOAc/pentane).

(E)-3,3-diisopropyl-1-(1,1,2,2-tetrafluoro-2-(4-methoxyphenyl)ethyl)triaz-1-ene (2d):

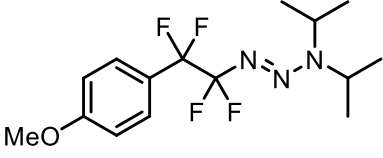 Obtained as yellow oil in 93 % yield (31.3 mg),  $^1\text{H}$  NMR (400 MHz,  $\text{CDCl}_3$ )  $\delta$  (ppm) = 7.48 (d,  $J = 8.6$  Hz, 2H), 6.91 (d,  $J = 8.7$  Hz, 2H), 4.99 (m, 1H), 3.95 (m, 1H), 3.83 (s, 3H), 1.22 (d,  $J = 6.6$  Hz, 6H), 1.17 (d,  $J = 6.8$  Hz, 6H);  $^{13}\text{C}$  NMR (101 MHz,  $\text{CDCl}_3$ )  $\delta$  (ppm) = 161.4, 128.5 (t,  $^3J_{\text{C-F}} = 6.4$  Hz), 124.4 (t,  $^2J_{\text{C-F}} = 25.2$  Hz), 118.2 (tt,  $^1J_{\text{C-F}} = 261.5$  Hz,  $^2J_{\text{C-F}} = 32.7$  Hz), 116.8 (tt,  $^1J_{\text{C-F}} = 253.6$  Hz,  $^2J_{\text{C-F}} = 38.6$  Hz), 113.5, 55.5, 50.4, 47.3, 23.1, 18.8;  $^{19}\text{F}$  NMR (376 MHz,  $\text{CDCl}_3$ )  $\delta$  (ppm) = -99.1 (t,  $J = 6.7$  Hz), -111.5 (t,  $J = 6.7$  Hz); IR (ATR):  $\tilde{\nu}$  1518, 1427, 1247, 1223, 1179, 1158, 1128, 1092, 1025, 958, 906, 831  $\text{cm}^{-1}$ ; HRMS (ESI/QTOF)  $m/z$ :  $[\text{M} + \text{H}]^+$  Calcd for  $\text{C}_{15}\text{H}_{22}\text{F}_4\text{N}_3\text{O}^+$  336.1694; Found 336.1698;  $R_f$ : 0.39 (1:9 EtOAc/pentane).

(E)-3,3-diisopropyl-1-(1,1,2,2-tetrafluoro-2-(p-tolyl)ethyl)triaz-1-ene (2e):

 Obtained as yellow oil in 90 % yield (28.6 mg),  $^1\text{H}$  NMR (400 MHz,  $\text{CDCl}_3$ )  $\delta$  (ppm) = 7.44 (d,  $J = 7.9$  Hz, 2H), 7.21

(d,  $J = 7.9$  Hz, 2H), 4.99 (m, 1H), 3.94 (m, 1H), 2.37 (s, 3H), 1.20 (d,  $J = 6.7$  Hz, 6H), 1.17 (d,  $J = 6.8$  Hz, 6H);  $^{13}\text{C}$  NMR (101 MHz,  $\text{CDCl}_3$ )  $\delta$  (ppm) = 140.7, 129.4 (t,  $^2J_{\text{C-F}} = 24.8$  Hz), 128.8, 126.9 (t,  $^3J_{\text{C-F}} = 6.4$  Hz), 118.2 (tt,  $^1J_{\text{C-F}} = 261.2$ , 32.2 Hz), 116.6 (tt,  $^1J_{\text{C-F}} = 253.9$ , 38.6 Hz), 50.4, 47.3, 23.1, 21.5, 18.8;  $^{19}\text{F}$  NMR (376 MHz,  $\text{CDCl}_3$ )  $\delta$  (ppm) = -99.0 (t,  $J = 6.4$  Hz), -112.2 (t,  $J = 6.3$  Hz); IR (ATR):  $\tilde{\nu}$  1680, 1223, 1158, 1123, 1092, 1028, 881, 812, 704, 676  $\text{cm}^{-1}$ ; HRMS (ESI/QTOF)  $m/z$ :  $[\text{M} + \text{H}]^+$  Calcd for  $\text{C}_{15}\text{H}_{22}\text{F}_4\text{N}_3^+$  320.1744; Found 320.1743;  $R_f$ : 0.58 (1:9 EtOAc/pentane).

(E)-3,3-diisopropyl-1-(1,1,2,2-tetrafluoro-2-(*m*-tolyl)ethyl)triaz-1-ene (2f):

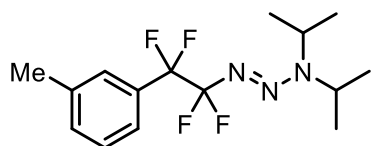

10 eq. DAST was used. Obtained as yellow oil in 56 % yield (17.9 mg),  $^1\text{H}$  NMR (400 MHz,  $\text{CDCl}_3$ )  $\delta$  (ppm) = 7.40–7.33 (m, 2H), 7.32–7.23 (m, 2H), 4.99 (m, 1H), 3.94 (m, 1H), 2.38 (s, 3H), 1.20 (d,  $J = 6.6$  Hz, 6H), 1.17 (d,  $J = 6.8$  Hz, 6H);  $^{13}\text{C}$  NMR (101 MHz,  $\text{CDCl}_3$ )  $\delta$  (ppm) = 137.8, 132.1 (t,  $^2J_{\text{C-F}} = 24.3$  Hz), 131.3, 128.0, 127.6 (t,  $^3J_{\text{C-F}} = 6.3$  Hz), 124.1 (t,  $^3J_{\text{C-F}} = 6.3$  Hz), 118.3 (tt,  $^1J_{\text{C-F}} = 261.1$ , 31.9 Hz), 116.5 (tt,  $^1J_{\text{C-F}} = 254.1$ , 38.3 Hz), 50.4, 47.3, 23.1, 21.5, 18.7;  $^{19}\text{F}$  NMR (376 MHz,  $\text{CDCl}_3$ )  $\delta$  (ppm) = -99.0 (t,  $J = 6.6$  Hz), -112.4 (t,  $J = 6.7$  Hz); IR (ATR):  $\tilde{\nu}$  1745, 1661, 1537, 1358, 1209, 865, 768, 700, 580  $\text{cm}^{-1}$ ; HRMS (ESI/QTOF)  $m/z$ :  $[\text{M} + \text{H}]^+$  Calcd for  $\text{C}_{15}\text{H}_{22}\text{F}_4\text{N}_3^+$  320.1744; Found 320.1744;  $R_f$ : 0.55 (1:9 EtOAc/pentane).

(E)-3,3-diisopropyl-1-(1,1,2,2-tetrafluoro-2-(*o*-tolyl)ethyl)triaz-1-ene (2g):

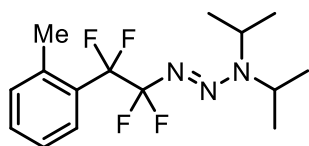

Obtained as yellow oil in 77 % yield (24.7 mg),  $^1\text{H}$  NMR (400 MHz,  $\text{CDCl}_3$ )  $\delta$  (ppm) = 7.46 (d,  $J = 7.9$  Hz, 1H), 7.31 (m, 1H), 7.19 (m, 2H), 5.04 (m, 1H), 3.94 (m, 1H), 2.49 (s, 3H), 1.18 (t,  $J = 7.1$  Hz, 12H);  $^{13}\text{C}$  NMR (101 MHz,  $\text{CDCl}_3$ )  $\delta$  (ppm) = 137.8 (t,  $^3J_{\text{C-F}} = 2.6$  Hz), 132.1, 130.5, 130.1 (t,  $^2J_{\text{C-F}} = 22.8$  Hz), 128.8 (t,  $^3J_{\text{C-F}} = 8.5$  Hz), 125.4, 118.7 (tt,  $^1J_{\text{C-F}} = 261.9$ , 32.3 Hz), 118.0 (tt,  $^1J_{\text{C-F}} = 255.5$ , 39.6 Hz), 50.2, 47.2, 23.2, 20.9 (m,  $J = 4.9$ , 2.4 Hz), 18.9;  $^{19}\text{F}$  NMR (376 MHz,  $\text{CDCl}_3$ )  $\delta$  (ppm) = -98.2 (t,  $J = 6.5$  Hz), -107.8 (t,  $J = 6.8$  Hz); IR (ATR):  $\tilde{\nu}$  1680, 1223, 1158, 1123, 1092, 1028, 881, 812, 704, 676  $\text{cm}^{-1}$ ; HRMS (ESI/QTOF)  $m/z$ :  $[\text{M} + \text{H}]^+$  Calcd for  $\text{C}_{15}\text{H}_{22}\text{F}_4\text{N}_3^+$  320.1744; Found 320.1753;  $R_f$ : 0.52 (1:9 EtOAc/pentane).

(E)-3,3-diisopropyl-1-(1,1,2,2-tetrafluoro-2-(5-iodothiophen-2-yl)ethyl)triaz-1-ene (2h):

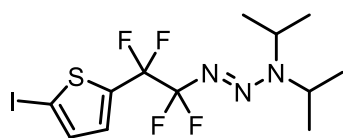

2.4 eq. DIH used. Obtained as yellow oil in 53 % yield (23.1 mg), **<sup>1</sup>H NMR** (400 MHz, CDCl<sub>3</sub>) δ (ppm) = 7.19 (dt, *J* = 3.8, 1.2 Hz, 1H), 7.05 (dt, *J* = 3.9, 1.2 Hz, 1H), 5.06 (hept, *J* = 6.8 Hz, 1H), 3.99 (hept, *J* = 6.6 Hz, 1H), 1.26 (d, *J* = 6.6 Hz, 6H), 1.21 (d, *J* = 6.8 Hz, 6H); **<sup>13</sup>C NMR** (101 MHz, CDCl<sub>3</sub>) δ (ppm) = 139.2 (t, <sup>2</sup>*J*<sub>C-F</sub> = 29.6 Hz), 136.6, 130.6 (t, <sup>3</sup>*J*<sub>C-F</sub> = 5.7 Hz), 117.7 (tt, <sup>1</sup>*J*<sub>C-F</sub> = 262.2, 31.3 Hz), 114.5 (tt, <sup>1</sup>*J*<sub>C-F</sub> = 253.8, 40.0 Hz), 78.0, 50.5, 47.6, 23.2, 18.9; **<sup>19</sup>F NMR** (376 MHz, CDCl<sub>3</sub>) δ (ppm) = -99.0 (t, *J* = 8.0 Hz), -103.3 (t, *J* = 8.2 Hz); **IR (ATR):**  $\tilde{\nu}$  2978, 1468, 1427, 1370, 1246, 1161, 1132, 1112, 1065, 1044, 923, 803 cm<sup>-1</sup>; **HRMS (ESI/QTOF)** *m/z*: [M + H]<sup>+</sup> Calcd for C<sub>12</sub>H<sub>17</sub>F<sub>4</sub>IN<sub>3</sub>S<sup>+</sup> 438.0119; Found 438.0113; **R<sub>f</sub>**: 0.73 (1:9 EtOAc/pentane).

(E)-1-((1,1,2,2-tetrafluoro-2-phenylethyl)diazenyl)piperidine (2i):

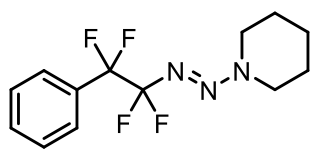

Obtained as yellow oil in 78 % yield (22.5 mg), **<sup>1</sup>H NMR** (400 MHz, CDCl<sub>3</sub>) δ (ppm) = 7.59 (d, *J* = 7.5 Hz, 2H), 7.50–7.41 (m, 3H), 3.74 (dt, *J* = 14.2, 5.7 Hz, 4H), 1.77–1.66 (m, 4H), 1.64–1.60 (m, 2H); **<sup>13</sup>C NMR** (101 MHz, CDCl<sub>3</sub>) δ (ppm) = 132.0 (t, <sup>2</sup>*J*<sub>C-F</sub> = 24.4 Hz), 130.7, 128.1, 127.1 (t, <sup>3</sup>*J*<sub>C-F</sub> = 6.6 Hz), 117.8 (tt, <sup>1</sup>*J*<sub>C-F</sub> = 261.4, 32.2 Hz), 116.3 (tt, <sup>1</sup>*J*<sub>C-F</sub> = 255.1, 38.2 Hz), 53.7, 43.6, 26.3, 24.3, 24.0; **<sup>19</sup>F NMR** (376 MHz, CDCl<sub>3</sub>) δ (ppm) = -99.3 (t, *J* = 5.3 Hz), -112.8 (t, *J* = 5.5 Hz); **IR (ATR):**  $\tilde{\nu}$  1745, 1661, 1537, 1358, 1209, 865, 768, 700, 580 cm<sup>-1</sup>; **HRMS (ESI/QTOF)** *m/z*: [M + H]<sup>+</sup> Calcd for C<sub>13</sub>H<sub>16</sub>F<sub>4</sub>N<sub>3</sub><sup>+</sup> 290.1275; Found 290.1265; **R<sub>f</sub>**: 0.44 (1:9 EtOAc/pentane).

**4. General Procedure B for the Synthesis of α-Difluoro Triazenyl Ketones 3:**

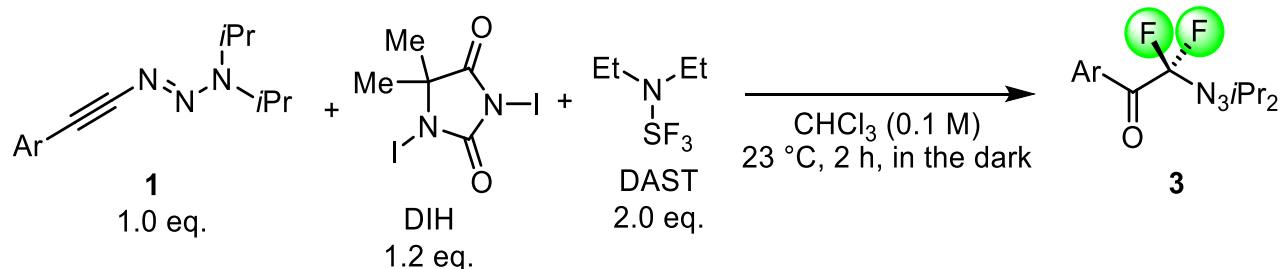

**General Procedure B:** Alkynyl triazene **1** (0.10 mmol, 1.0 eq.) and DIH (0.12 mmol, 45.6 mg, 1.2 eq.) were weighed in Falcon tube containing a magnetic stirring bar. Addition of  $\text{CHCl}_3$  (1.0 mL) at RT was immediately followed by addition of DAST (0.20 mmol, 26.4  $\mu\text{L}$ , 2.0 eq.) *via* a micro pipette. The mixture was stirred at RT for 2 h, in the dark with aluminium foil.

After completion of reaction, the mixture was concentrated under reduced pressure. Crude was then purified by silica gel chromatography eluting with pentane/EtOAc to afford the  $\alpha$ -difluoro triazenyl ketone product **3**.

(E)-2-(3,3-diisopropyltriaz-1-en-1-yl)-2,2-difluoro-1-(naphthalen-1-yl)ethan-1-one (3a):

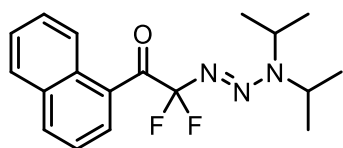

Obtained as yellow oil in 92 % yield (30.8 mg),  $^1\text{H NMR}$  (400 MHz,  $\text{CDCl}_3$ )  $\delta$  (ppm) = 8.79 (dd,  $J$  = 8.7, 1.1 Hz, 1H), 8.06–7.97 (m, 2H), 7.87 (dt,  $J$  = 8.1, 1.0 Hz, 1H), 7.63 (ddd,  $J$  = 8.5, 6.8, 1.5 Hz, 1H), 7.54 (ddd,  $J$  = 8.1, 6.9, 1.2 Hz, 1H), 7.47 (dd,  $J$  = 8.2, 7.4 Hz, 1H), 5.14 (m, 1H), 3.83 (m, 1H), 1.19 (d,  $J$  = 6.8 Hz, 6H), 0.93 (d,  $J$  = 6.6 Hz, 6H);  $^{13}\text{C NMR}$  (101 MHz,  $\text{CDCl}_3$ )  $\delta$  (ppm) = 191.6 (t,  $^2J_{\text{C-F}}$  = 35.2 Hz), 134.0, 133.9, 131.6 (t,  $^3J_{\text{C-F}}$  = 3.7 Hz), 131.3, 129.9, 128.7, 128.6, 126.6, 125.8, 124.1, 119.0 (t,  $^1J_{\text{C-F}}$  = 248.7 Hz), 50.2, 47.3, 23.1, 18.9;  $^{19}\text{F NMR}$  (376 MHz,  $\text{CDCl}_3$ )  $\delta$  (ppm) = -82.8; **IR (ATR):**  $\tilde{\nu}$  2923, 2852, 1680, 1598, 1453, 1408, 1260, 1227, 1196, 1175, 720  $\text{cm}^{-1}$ ; **HRMS (ESI/QTOF)**  $m/z$ :  $[\text{M} + \text{Na}]^+$  Calcd for  $\text{C}_{18}\text{H}_{21}\text{F}_2\text{N}_3\text{NaO}^+$  356.1545; Found 356.1541; **R<sub>f</sub>**: 0.44 (1:9 EtOAc/pentane).

(E)-2-(3,3-diisopropyltriaz-1-en-1-yl)-2,2-difluoro-1-phenylethan-1-one (3b):

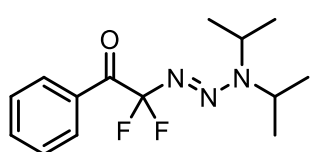

Obtained as yellow oil in 89 % yield (25.1 mg),  $^1\text{H NMR}$  (400 MHz,  $\text{CDCl}_3$ )  $\delta$  (ppm) = 7.97 (d,  $J$  = 7.4 Hz, 2H), 7.58–7.50 (m, 1H), 7.48–7.40 (m, 2H), 5.14 (m, 1H), 3.82 (m, 1H), 1.20 (d,  $J$  = 6.8 Hz, 6H), 0.93 (d,  $J$  = 6.6 Hz, 6H);  $^{13}\text{C NMR}$  (101 MHz,  $\text{CDCl}_3$ )  $\delta$  (ppm) = 189.2 (t,  $^2J_{\text{C-F}}$  = 34.8 Hz), 133.6, 132.7, 130.6 (t,  $^3J_{\text{C-F}}$  = 2.1 Hz), 128.5, 119.2 (t,  $^1J_{\text{C-F}}$  = 245.9

Hz), 50.1, 47.2, 23.1, 18.9;  $^{19}\text{F}$  NMR (376 MHz,  $\text{CDCl}_3$ )  $\delta$  (ppm) = -83.7; IR (ATR):  $\tilde{\nu}$  2926, 1696, 1679, 1469, 1449, 1281, 1211, 1170, 1134, 1098, 709, 666  $\text{cm}^{-1}$ ; HRMS (ESI/QTOF) m/z:  $[\text{M} + \text{H}]^+$  Calcd for  $\text{C}_{14}\text{H}_{20}\text{F}_2\text{N}_3\text{O}^+$  284.1569; Found 284.1364; Rf: 0.18 (1:9 EtOAc/pentane).

(E)-2-(3,3-diisopropyltriaz-1-en-1-yl)-2,2-difluoro-1-(4-fluorophenyl)ethan-1-one (3c):

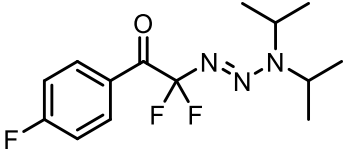 Obtained as yellow oil in 86 % yield (26.0 mg),  $^1\text{H}$  NMR (400 MHz,  $\text{CDCl}_3$ )  $\delta$  (ppm) = 8.06–7.97 (m, 2H), 7.14–7.07 (m, 2H), 5.14 (m, 1H), 3.85 (m, 1H), 1.21 (d,  $J$  = 6.8 Hz, 6H), 0.95 (d,  $J$  = 6.6 Hz, 6H);  $^{13}\text{C}$  NMR (101 MHz,  $\text{CDCl}_3$ )  $\delta$  (ppm) = 187.7 (t,  $^2J_{\text{C-F}}$  = 35.1 Hz), 165.96 (d,  $^1J_{\text{C-F}}$  = 256.3 Hz), 133.4 (dt,  $^3J_{\text{C-F}}$  = 9.6, 2.4 Hz), 129.1 (d,  $^3J_{\text{C-F}}$  = 3.1 Hz), 119.1 (t,  $^1J_{\text{C-F}}$  = 246.0 Hz), 115.7 (d,  $^2J_{\text{C-F}}$  = 22.0 Hz), 50.2, 47.4, 23.1, 18.9;  $^{19}\text{F}$  NMR (376 MHz,  $\text{CDCl}_3$ )  $\delta$  (ppm) = -83.67, -103.83; IR (ATR):  $\tilde{\nu}$  1713, 1600, 1432, 1410, 1223, 1158, 1130, 1025, 941, 853, 744, 619  $\text{cm}^{-1}$ ; HRMS (ESI/QTOF) m/z:  $[\text{M} + \text{Na}]^+$  Calcd for  $\text{C}_{14}\text{H}_{18}\text{F}_3\text{N}_3\text{NaO}^+$  324.1294; Found 324.1293; Rf: 0.18 (1:9 EtOAc/pentane).

(E)-2-(3,3-diisopropyltriaz-1-en-1-yl)-2,2-difluoro-1-phenylethan-1-one (3d):

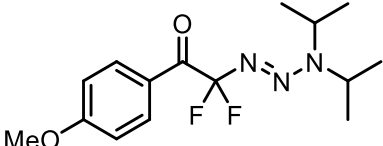 0.3 eq. DAST. Obtained as yellow oil in 47 % yield (14.8 mg),  $^1\text{H}$  NMR (400 MHz,  $\text{CDCl}_3$ )  $\delta$  (ppm) = 7.95 (d,  $J$  = 8.7 Hz, 2H), 6.90 (d,  $J$  = 7.6 Hz, 2H), 5.14 (t,  $J$  = 7.8 Hz, 1H), 3.89 (d,  $J$  = 2.7 Hz, 1H), 3.86 (s, 3H), 1.25–1.17 (m, 6H), 1.00–0.94 (m, 6H);  $^{13}\text{C}$  NMR (101 MHz,  $\text{CDCl}_3$ )  $\delta$  (ppm) = 187.7 (t,  $^2J_{\text{C-F}}$  = 34.3 Hz), 163.9, 133.0, 125.7, 119.3 (t,  $^1J_{\text{C-F}}$  = 246.4 Hz), 113.7, 55.6, 50.1, 47.2, 23.2, 19.0;  $^{19}\text{F}$  NMR (376 MHz,  $\text{CDCl}_3$ )  $\delta$  (ppm) = -83.5; IR (ATR):  $\tilde{\nu}$  2925, 2853, 1702, 1602, 1512, 1602, 1512, 1433, 1262, 1162, 1133, 1026, 940  $\text{cm}^{-1}$ ; HRMS (ESI/QTOF) m/z:  $[\text{M} + \text{Na}]^+$  Calcd for  $\text{C}_{15}\text{H}_{21}\text{F}_2\text{N}_3\text{NaO}_2^+$  336.1494; Found 336.1486; Rf: 0.12 (1:9 EtOAc/pentane).

(E)-2-(3,3-diisopropyltriaz-1-en-1-yl)-2,2-difluoro-1-(p-tolyl)ethan-1-one (3e):

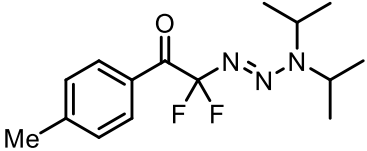 Obtained as colourless solid in 93 % yield (27.7 mg),  $^1\text{H}$  NMR (400 MHz,  $\text{CDCl}_3$ )  $\delta$  (ppm) = 7.86 (d,  $J$  = 8.0 Hz, 2H), 7.22 (d,  $J$  = 8.1 Hz, 2H), 5.14 (m, 1H), 3.83 (m, 1H), 2.40 (s, 3H), 1.20 (d,  $J$  = 6.8 Hz, 6H), 0.95 (d,  $J$  = 6.6 Hz, 6H);  $^{13}\text{C}$  NMR (101 MHz,  $\text{CDCl}_3$ )  $\delta$  (ppm) = 188.8 (t,  $^2J_{\text{C-F}}$  = 34.5 Hz), 144.6, 130.7, 130.2, 129.2, 119.2 (t,  $^1J_{\text{C-F}}$  = 246.3 Hz), 50.1, 47.2, 23.1, 21.9, 18.9;  $^{19}\text{F}$  NMR (376 MHz,  $\text{CDCl}_3$ )  $\delta$  (ppm) = -83.7; IR

**(ATR):**  $\tilde{\nu}$  1676, 1605, 1314, 1282, 1217, 1208, 1173, 1098, 735, 712  $\text{cm}^{-1}$ ; **HRMS (ESI/QTOF)**  $[\text{M} + \text{Na}]^+$  Calcd for  $\text{C}_{15}\text{H}_{21}\text{F}_2\text{N}_3\text{NaO}^+$  320.1545; Found 320.1538; **R<sub>f</sub>**: 0.27 (1:9 EtOAc/pentane).

**(E)-2-(3,3-diisopropyltriaz-1-en-1-yl)-2,2-difluoro-1-(*m*-tolyl)ethan-1-one (3f):**

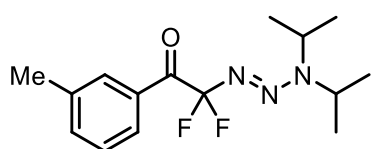

5 hour reaction time. Obtained as colourless oil in 64 % yield (19.0 mg), **<sup>1</sup>H NMR** (400 MHz,  $\text{CDCl}_3$ )  $\delta$  (ppm) = 7.82–7.72 (m, 2H), 7.38–7.28 (m, 2H), 7.26 (s, 1H), 5.15 (m, 1H), 3.83 (m, 1H), 2.38 (s, 3H), 1.21 (dd,  $J = 6.8, 1.3$  Hz, 6H), 0.95 (dd,  $J = 6.6, 1.3$  Hz, 6H); **<sup>13</sup>C NMR** (101 MHz,  $\text{CDCl}_3$ )  $\delta$  (ppm) = 189.3 (t,  $^2J_{\text{C-F}} = 35.1$  Hz), 138.2, 134.4, 132.6, 131.0, 128.3, 127.9, 119.2 (t,  $^1J_{\text{C-F}} = 247.2$  Hz), 50.1, 47.2, 23.1, 21.4, 18.9; **<sup>19</sup>F NMR** (376 MHz,  $\text{CDCl}_3$ )  $\delta$  (ppm) = -83.7; **IR (ATR):**  $\tilde{\nu}$  1676, 1608, 1314, 1292, 1219, 1208, 1173, 1100, 967, 735, 712  $\text{cm}^{-1}$ ; **HRMS (ESI/QTOF)**  $[\text{M} + \text{Na}]^+$  Calcd for  $\text{C}_{15}\text{H}_{21}\text{F}_2\text{N}_3\text{NaO}^+$  320.1545; Found 320.1542; **R<sub>f</sub>**: 0.28 (1:9 EtOAc/pentane).

**(E)-2-(3,3-diisopropyltriaz-1-en-1-yl)-2,2-difluoro-1-(*o*-tolyl)ethan-1-one (3g):**

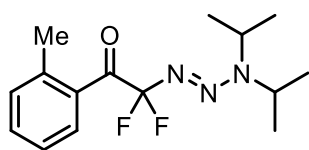

5 hour reaction time. Obtained as yellow oil in 67 % yield (19.8 mg), **<sup>1</sup>H NMR** (400 MHz,  $\text{CDCl}_3$ )  $\delta$  (ppm) = 7.71 (d,  $J = 7.9$  Hz, 1H), 7.37 (t,  $J = 7.6$  Hz, 1H), 7.26 (d,  $J = 5.1$  Hz, 1H), 7.21 (t,  $J = 7.7$  Hz, 1H), 5.13 (m, 1H), 3.87 (m, 1H), 2.58 (s, 3H), 1.20 (d,  $J = 6.1$  Hz, 6H), 1.02 (d,  $J = 6.6$  Hz, 6H); **<sup>13</sup>C NMR** (101 MHz,  $\text{CDCl}_3$ )  $\delta$  (ppm) = 191.1 (t,  $^2J_{\text{C-F}} = 34.7$  Hz), 141.0, 132.05, 132.03, 132.02, 131.6 (t,  $^3J_{\text{C-F}} = 3.3$  Hz), 125.2, 118.7 (t,  $^1J_{\text{C-F}} = 248.2$  Hz), 50.0, 47.1, 23.0, 21.9, 18.8; **<sup>19</sup>F NMR** (376 MHz,  $\text{CDCl}_3$ )  $\delta$  (ppm) = -83.3; **IR (ATR):**  $\tilde{\nu}$  1680, 1605, 1315, 1286, 1217, 1208, 1173, 1098, 733, 712  $\text{cm}^{-1}$ ; **HRMS (ESI/QTOF)**  $[\text{M} + \text{Na}]^+$  Calcd for  $\text{C}_{15}\text{H}_{21}\text{F}_2\text{N}_3\text{NaO}^+$  320.1545; Found 320.1538; **R<sub>f</sub>**: 0.34 (1:9 EtOAc/pentane).

**(E)-2-(3,3-diisopropyltriaz-1-en-1-yl)-2,2-difluoro-1-(5-iodothiophen-2-yl)ethan-1-one (3h):**

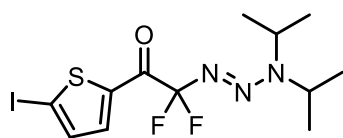

2.4 eq. DIH used. Obtained as yellow oil in 33 % yield (13.6 mg), **<sup>1</sup>H NMR** (400 MHz,  $\text{CDCl}_3$ )  $\delta$  (ppm) = 7.38 (dt,  $J = 4.1, 1.2$  Hz, 1H), 7.30 (d,  $J = 4.0$  Hz, 1H), 5.11 (hept,  $J = 6.8$  Hz, 1H), 3.90 (hept,  $J = 6.6$  Hz, 1H), 1.21 (d,  $J = 6.8$  Hz, 7H), 1.05 (d,  $J = 6.6$  Hz, 6H); **<sup>19</sup>F NMR** (376 MHz,  $\text{CDCl}_3$ )  $\delta$  (ppm) = -84.5; **IR (ATR):**  $\tilde{\nu}$  2978, 2929, 1687, 1469, 1434, 1401, 1370, 1223, 1132, 1061, 1024, 956, 860, 792, 736, 720  $\text{cm}^{-1}$ ; **HRMS**

**(ESI/QTOF)** m/z: [M + Na]<sup>+</sup> Calcd for C<sub>12</sub>H<sub>16</sub>F<sub>2</sub>IN<sub>3</sub>NaOS<sup>+</sup> 437.9919; Found 437.9923; **R<sub>f</sub>**: 0.27 (1:9 EtOAc/pentane). No successful <sup>13</sup>C NMR spectrum was recorded as **3h** rapidly converts to diketone **4h** within 15 minutes.

(E)-1-(3,3-diisopropyltriaz-1-en-1-yl)-2-(5-iodothiophen-2-yl)ethane-1,2-dione (**4h**):

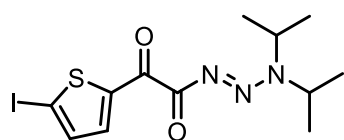

<sup>1</sup>H NMR (400 MHz, CDCl<sub>3</sub>) δ (ppm) = 7.31 (d, *J* = 3.9 Hz, 1H), 7.25 (d, *J* = 4.0 Hz, 1H), 5.51 (hept, *J* = 6.8 Hz, 1H), 4.17 (hept, *J* = 6.6 Hz, 1H), 1.31 (d, *J* = 6.8 Hz, 6H), 1.20 (d, *J* = 6.6 Hz, 6H); <sup>13</sup>C NMR (101 MHz, CDCl<sub>3</sub>) δ (ppm) = 185.9, 178.9, 147.0, 138.5, 136.1, 87.5, 52.7, 50.6, 23.2, 19.0; **IR (ATR):**  $\tilde{\nu}$  2970, 2929, 1680, 1477, 1400, 1370, 1138, 1000, 996, cm<sup>-1</sup>; **HRMS (ESI/QTOF)** m/z: [M + Na]<sup>+</sup> Calcd for C<sub>12</sub>H<sub>16</sub>IN<sub>3</sub>NaO<sub>2</sub>S<sup>+</sup> 415.9900; Found 415.9905; **R<sub>f</sub>**: 0.38 (1:2 EtOAc/pentane).

(E)-2,2-difluoro-1-phenyl-2-(piperidin-1-yl diazenyl)ethan-1-one (**3i**):

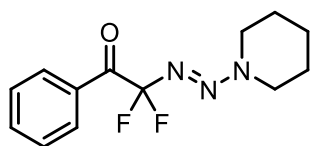

Obtained as yellow oil in 80 % yield (21.3 mg), <sup>1</sup>H NMR (400 MHz, CDCl<sub>3</sub>) δ (ppm) = 7.99 (d, *J* = 7.8 Hz, 2H), 7.57 (td, *J* = 7.2, 1.5 Hz, 1H), 7.45 (t, *J* = 7.8 Hz, 2H), 3.84 (t, *J* = 5.6 Hz, 2H), 3.58 (t, *J* = 5.7 Hz, 2H), 1.63 (m 6H); <sup>13</sup>C NMR (101 MHz, CDCl<sub>3</sub>) δ (ppm) = 188.4 (t, <sup>2</sup>*J*<sub>C-F</sub> = 35.2 Hz), 133.9, 132.4, 130.7 (t, <sup>3</sup>*J*<sub>C-F</sub> = 2.2 Hz), 128.6, 118.8 (t, <sup>1</sup>*J*<sub>C-F</sub> = 249.6 Hz), 53.6, 43.5, 26.3, 24.4, 23.9; <sup>19</sup>F NMR (376 MHz, CDCl<sub>3</sub>) δ (ppm) = -84.8; **IR (ATR):**  $\tilde{\nu}$  2923, 2852, 1680, 1598, 1453, 1408, 1260, 1227, 1196, 1175, 720 cm<sup>-1</sup>; **HRMS (ESI/QTOF)** m/z: [M + H]<sup>+</sup> Calcd for C<sub>13</sub>H<sub>16</sub>F<sub>2</sub>N<sub>3</sub>O<sup>+</sup> 268.1256; Found 268.1056; **R<sub>f</sub>**: 0.25 (1:9 EtOAc/pentane).

(E)-1-((E)-1-fluoro-2-iodo-2-(naphthalen-1-yl)vinyl)-3,3-diisopropyltriaz-1-ene, (E)-1-((Z)-1-fluoro-2-iodo-2-(naphthalen-1-yl)vinyl)-3,3-diisopropyltriaz-1-ene (**5a**):

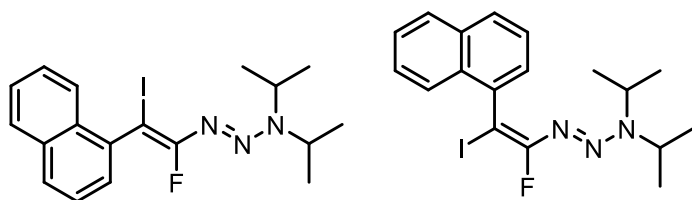

Isolated from reaction crude during optimizations. Obtained as yellow oil. <sup>1</sup>H NMR (400 MHz, CDCl<sub>3</sub>) δ (ppm) = **Trans isomer:** 8.10 (d, *J* = 8.3 Hz, 1H), 7.89–7.85 (m, 1H), 7.82 (d, *J* = 8.1 Hz, 1H), 7.62–7.39 (m, 4H, overlapped), 5.09 (hept, *J* = 6.8 Hz, 1H), 4.09 (hept, *J* = 6.6 Hz, 1H), 1.40 (dd, *J* = 6.8, 3.7 Hz, 6H), 1.36 (dd, *J* = 6.7, 2.7 Hz, 6H); **Cis isomer:** 8.04 (d, *J* = 8.4 Hz, 1H), 7.84 (d, *J* = 8.0 Hz, 1H, overlapped), 7.75 (d, *J* = 8.2 Hz, 1H), 7.61–7.38 (m, 4H, overlapped), 4.32 (hept, *J* = 6.8 Hz, 1H), 3.78 (hept, *J* = 6.6 Hz, 1H), 1.00 (t, *J* = 6.8 Hz, 6H), 0.79 (dd, *J* = 6.8, 3.4 Hz,

6H); **<sup>13</sup>C NMR** (101 MHz, CDCl<sub>3</sub>) δ (ppm) = 159.0 (d, <sup>1</sup>J<sub>C-F</sub> = 277.3 Hz), 154.5 (d, <sup>1</sup>J<sub>C-F</sub> = 298.5 Hz), 137.4 (d, <sup>3</sup>J<sub>C-F</sub> = 4.0 Hz), 136.9, 136.3, 135.5, 134.0, 133.9, 131.7, 131.5, 129.3, 128.7, 128.7 (d, <sup>3</sup>J<sub>C-F</sub> = 3.1 Hz), 128.4, 128.3, 128.2, 126.4, 126.2, 126.0, 125.9, 125.6, 125.5, 63.2 (d, <sup>2</sup>J<sub>C-F</sub> = 40.5 Hz), 59.3 (d, <sup>2</sup>J<sub>C-F</sub> = 40.0 Hz), 51.5, 51.1, 48.7, 47.9, 23.3, 23.2, 22.8, 22.8, 19.1, 19.0, 18.6, 18.6; **<sup>19</sup>F NMR** (376 MHz, CDCl<sub>3</sub>) δ (ppm) = -92.7; **IR (ATR):**  $\tilde{\nu}$  2972, 2930, 1718, 1688, 1625, 1574, 1467, 1399, 1379, 1367, 1249, 1221, 1195, 1157, 1129, 1099732, 695 cm<sup>-1</sup>; **HRMS (ESI/QTOF)** [M + H]<sup>+</sup> Calcd for C<sub>18</sub>H<sub>22</sub>FIN<sub>3</sub><sup>+</sup> 426.0837; Found 426.0831; **R<sub>f</sub>**: 0.84 (1:9 EtOAc/pentane).



## 5. General Procedure C for the Synthesis of $\alpha$ -Difluoro Acyl Triazenes **6**:

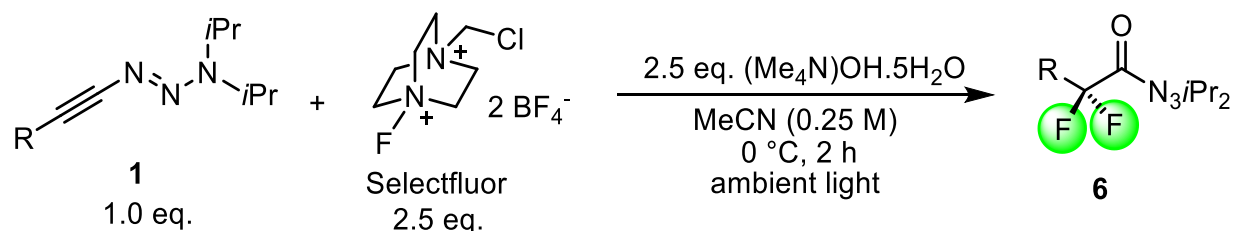

**General Procedure C:** Alkynyl triazene **1** (0.10 mmol, 1.0 eq.), Selectfluor (0.25 mmol, 88.6 mg, 2.5 eq.) and  $(\text{Me}_4\text{N})\text{OH}\cdot 5\text{H}_2\text{O}$  (0.25 mmol, 45.3 mg, 2.5 eq.) were weighed in a test tube containing a magnetic stirring bar.  $\text{MeCN}$  (0.25 mL) pre-cooled at  $0\text{ }^\circ\text{C}$  was added to the test tube. The mixture was stirred at  $0\text{ }^\circ\text{C}$  for 2 h under ambient light.

After completion of reaction, the mixture was concentrated under reduced pressure. Crude was then purified by silica gel chromatography eluting with pentane/ $\text{EtOAc}$  to afford the  $\alpha$ -difluoro acyl triazene product **6**.

### (E)-1-(3,3-diisopropyltriaz-1-en-1-yl)-2,2-difluoro-2-(naphthalen-1-yl)ethan-1-one (**6a**):

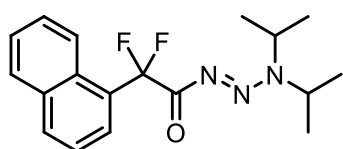

Obtained as white solid in 86 % yield (28.8 mg),  $^1\text{H NMR}$  (400 MHz,  $\text{CDCl}_3$ )  $\delta$  (ppm) = 8.39–8.27 (m, 1H), 7.91 (d,  $J$  = 7.7 Hz, 2H), 7.88–7.83 (m, 1H), 7.56–7.45 (m, 3H), 4.88 (m, 1H), 4.16 (m, 1H), 1.27 (d,  $J$  = 6.7 Hz, 6H), 1.08 (d,  $J$  = 6.9 Hz, 6H);  $^{13}\text{C NMR}$  (101 MHz,  $\text{CDCl}_3$ )  $\delta$  (ppm) = 174.2 (t,  $^2J_{\text{C-F}}$  = 29.4 Hz), 133.9, 131.1, 130.9 (t,  $^2J_{\text{C-F}}$  = 23.6 Hz), 129.8, 128.6, 127.1, 126.1, 125.3 (t,  $^4J_{\text{C-F}}$  = 3.0 Hz), 124.9 (t,  $^3J_{\text{C-F}}$  = 9.3 Hz), 124.6, 116.5 (t,  $^1J_{\text{C-F}}$  = 251.2 Hz), 54.4, 51.4, 22.6, 18.5;  $^{19}\text{F NMR}$  (376 MHz,  $\text{CDCl}_3$ )  $\delta$  (ppm) = -99.8; **IR (ATR):**  $\tilde{\nu}$  1645, 1450, 1400, 1260, 1120, 1048, 822, 695, 679  $\text{cm}^{-1}$ ; **HRMS (ESI/QTOF)**  $m/z$ :  $[\text{M} + \text{Na}]^+$  Calcd for  $\text{C}_{18}\text{H}_{21}\text{F}_2\text{N}_3\text{NaO}^+$  356.1545; Found 356.1540; **R<sub>f</sub>**: 0.30 (1:7  $\text{EtOAc}$ /pentane).

### (E)-1-(3,3-diisopropyltriaz-1-en-1-yl)-2,2-difluoro-2-phenylethan-1-one (**6b**):

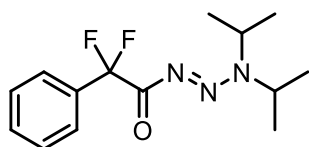

Obtained as yellow oil in 85 % yield (24.1 mg),  $^1\text{H NMR}$  (400 MHz,  $\text{CDCl}_3$ )  $\delta$  (ppm) = 7.70–7.61 (m, 2H), 7.41 (dd,  $J$  = 5.0, 1.9 Hz, 3H), 5.16 (m, 1H), 4.21 (m, 1H), 1.30 (d,  $J$  = 6.6 Hz, 6H), 1.25 (d,  $J$  = 6.9 Hz, 6H);  $^{13}\text{C NMR}$  (101 MHz,  $\text{CDCl}_3$ )  $\delta$  (ppm) = 174.1 (t,  $^2J_{\text{C-F}}$  = 29.2 Hz), 135.0 (t,  $^2J_{\text{C-F}}$  = 25.7 Hz), 130.3, 128.4, 125.7 (t,  $^3J_{\text{C-F}}$  = 6.1 Hz), 115.8 (t,  $^1J_{\text{C-F}}$  = 251.4 Hz), 53.9, 51.0, 22.8, 18.7;  $^{19}\text{F NMR}$  (376 MHz,  $\text{CDCl}_3$ )  $\delta$  (ppm) = -102.6; **IR (ATR):**  $\tilde{\nu}$  2960, 1644, 1453,

1397, 1262, 1060, 812, 699  $\text{cm}^{-1}$ ; **HRMS (ESI/QTOF)**  $m/z$ :  $[\text{M} + \text{Na}]^+$  Calcd for  $\text{C}_{14}\text{H}_{19}\text{F}_2\text{N}_3\text{NaO}^+$  306.1388; Found 306.1389; **R<sub>f</sub>**: 0.17 (1:7 EtOAc/pentane).

(E)-1-(3,3-diisopropyltriaz-1-en-1-yl)-2,2-difluoro-2-(4-fluorophenyl)ethan-1-one (6c):

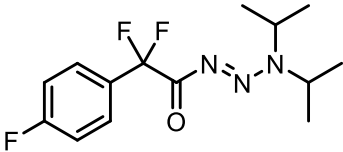 Obtained as yellow oil in 90 % yield (27.1 mg), **<sup>1</sup>H NMR** (400 MHz,  $\text{CDCl}_3$ )  $\delta$  (ppm) = 7.71–7.53 (m, 2H), 7.10 (t,  $J$  = 8.7 Hz, 2H), 5.16 (m, 1H), 4.23 (m, 1H), 1.34 (d,  $J$  = 6.7 Hz, 6H), 1.27 (d,  $J$  = 6.9 Hz, 6H); **<sup>13</sup>C NMR** (101 MHz,  $\text{CDCl}_3$ )  $\delta$  (ppm) 173.8 (t,  $^2J_{\text{C-F}}$  = 29.4 Hz), 163.9 (d,  $^1J_{\text{C-F}}$  = 249.5 Hz), 133.6 (d,  $^3J_{\text{C-F}}$  = 9.2 Hz), 131.65–130.52 (m), 128.0 (dt,  $^3J_{\text{C-F}}$  = 8.8, 6.0 Hz), 115.5 (d,  $^2J_{\text{C-F}}$  = 22.1 Hz), 54.0, 51.2, 22.9, 18.8; **<sup>19</sup>F NMR** (376 MHz,  $\text{CDCl}_3$ )  $\delta$  (ppm) = -102.2, -110.6 (t,  $J$  = 3.0 Hz).; **IR (ATR):**  $\tilde{\nu}$  1699, 1655, 1608, 1511, 1396, 1299, 1261, 1234, 1159, 1122, 1096, 842  $\text{cm}^{-1}$ ; **HRMS (ESI/QTOF)**  $m/z$ :  $[\text{M} + \text{Na}]^+$  Calcd for  $\text{C}_{14}\text{H}_{18}\text{F}_3\text{N}_3\text{NaO}^+$  324.1294; Found 324.1284; **R<sub>f</sub>**: 0.55 (1:3 EtOAc/pentane).

(E)-1-(3,3-diisopropyltriaz-1-en-1-yl)-2,2-difluoro-2-(4-methoxyphenyl)ethan-1-one (6d):

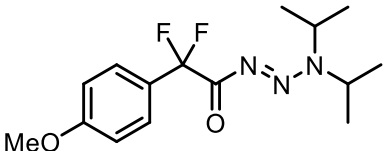 Obtained as yellow oil in 64 % yield (20.1 mg), **<sup>1</sup>H NMR** (400 MHz,  $\text{CDCl}_3$ )  $\delta$  (ppm) = 7.57 (d,  $J$  = 8.9 Hz, 2H), 6.92 (d,  $J$  = 8.8 Hz, 2H), 5.17 (m, 1H), 4.22 (m, 1H), 3.82 (s, 3H), 1.33 (d,  $J$  = 6.6 Hz, 6H), 1.27 (d,  $J$  = 6.8 Hz, 6H); **<sup>13</sup>C NMR** (101 MHz,  $\text{CDCl}_3$ )  $\delta$  (ppm) = 174.3 (t,  $^2J_{\text{C-F}}$  = 30.0 Hz), 161.1, 127.4 (t,  $^3J_{\text{C-F}}$  = 5.9 Hz), 127.1 (d,  $^2J_{\text{C-F}}$  = 26.4 Hz), 115.9 (t,  $^1J_{\text{C-F}}$  = 251.3 Hz), 113.8, 55.5, 53.8, 51.0, 22.9, 18.8; **<sup>19</sup>F NMR** (376 MHz,  $\text{CDCl}_3$ )  $\delta$  (ppm) = -101.6; **IR (ATR):**  $\tilde{\nu}$  1697, 1654, 1614, 1515, 1302, 1250, 1177, 1096, 1024, 988, 837  $\text{cm}^{-1}$ ; **HRMS (ESI/QTOF)**  $m/z$ :  $[\text{M} + \text{Na}]^+$  Calcd for  $\text{C}_{15}\text{H}_{21}\text{F}_2\text{N}_3\text{NaO}_2^+$  336.1494; Found 336.1499; **R<sub>f</sub>**: 0.70 (1:3 EtOAc/pentane).

(E)-1-(3,3-diisopropyltriaz-1-en-1-yl)-2,2-difluoro-2-(p-tolyl)ethan-1-one (6e):

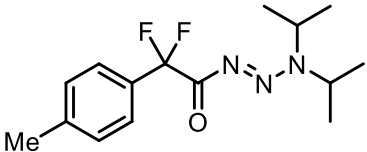 Obtained as yellow oil in 83 % yield (24.7 mg), **<sup>1</sup>H NMR** (400 MHz,  $\text{CDCl}_3$ )  $\delta$  (ppm) = 7.53 (d,  $J$  = 8.0 Hz, 2H), 7.21 (d,  $J$  = 8.5 Hz, 2H), 5.17 (m, 1H), 4.21 (m, 1H), 2.36 (s, 3H), 1.32 (d,  $J$  = 6.7 Hz, 6H), 1.26 (d,  $J$  = 6.8 Hz, 6H); **<sup>13</sup>C NMR** (101 MHz,  $\text{CDCl}_3$ )  $\delta$  (ppm) = 174.3 (t,  $^2J_{\text{C-F}}$  = 29.5 Hz), 140.3, 132.1 (t,  $^2J_{\text{C-F}}$  = 26.0 Hz), 129.1, 125.7 (t,  $^3J_{\text{C-F}}$  = 6.0 Hz), 116.0 (t,  $^1J_{\text{C-F}}$  = 251.3 Hz), 53.8, 50.9, 22.8, 21.5, 18.8; **<sup>19</sup>F NMR** (376 MHz,  $\text{CDCl}_3$ )  $\delta$  (ppm) = -102.2; **IR (ATR):**  $\tilde{\nu}$  1702, 1650, 1396, 1337, 1299, 1270, 1234, 1186, 1099,

1078, 999, 808  $\text{cm}^{-1}$ ; **HRMS (ESI/QTOF)**  $[\text{M} + \text{Na}]^+$  Calcd for  $\text{C}_{15}\text{H}_{21}\text{F}_2\text{N}_3\text{NaO}^+$  320.1545; Found 320.1540; **R<sub>f</sub>**: 0.29 (1:9 EtOAc/pentane).

(E)-1-(3,3-diisopropyltriaz-1-en-1-yl)-2,2-difluoro-2-(m-tolyl)ethan-1-one (6f):

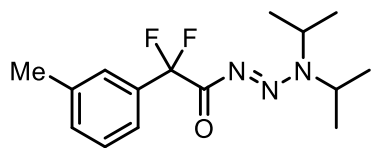

Obtained as yellow oil in 77 % yield (22.9 mg), **<sup>1</sup>H NMR** (400 MHz,  $\text{CDCl}_3$ )  $\delta$  (ppm) = 7.48–7.41 (m, 2H), 7.29 (t,  $J$  = 7.6 Hz, 1H), 7.24–7.20 (m, 1H), 5.17 (hept,  $J$  = 6.8 Hz, 1H), 4.21 (hept,  $J$  = 6.6 Hz, 1H), 2.37 (s, 3H), 1.31 (d,  $J$  = 6.6 Hz, 6H), 1.26 (d,  $J$  = 6.8 Hz, 6H); **<sup>13</sup>C NMR** (101 MHz,  $\text{CDCl}_3$ )  $\delta$  (ppm) = 174.3 (t,  $^2J_{\text{C-F}}$  = 29.3 Hz), 138.2, 134.9 (t,  $^2J_{\text{C-F}}$  = 25.4 Hz), 131.0, 128.3, 126.3 (t,  $^3J_{\text{C-F}}$  = 6.0 Hz), 122.8 (t,  $^3J_{\text{C-F}}$  = 6.1 Hz), 115.9 (t,  $^1J_{\text{C-F}}$  = 251.6 Hz), 53.9, 50.98, 22.8, 21.5, 18.7; **<sup>19</sup>F NMR** (376 MHz,  $\text{CDCl}_3$ )  $\delta$  (ppm) = -102.6; **IR (ATR):**  $\tilde{\nu}$  1698, 1650, 1395, 1336, 1296, 1277, 1234, 1185, 1155, 1095, 1079, 1003, 809, 797, 747  $\text{cm}^{-1}$ ; **HRMS (ESI/QTOF)**  $[\text{M} + \text{Na}]^+$  Calcd for  $\text{C}_{15}\text{H}_{21}\text{F}_2\text{N}_3\text{NaO}^+$  320.1545; Found 320.1539; **R<sub>f</sub>**: 0.39 (1:4 EtOAc/pentane).

(E)-1-(3,3-diisopropyltriaz-1-en-1-yl)-2,2-difluoro-2-(o-tolyl)ethan-1-one (6g):

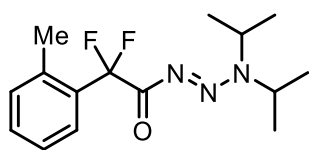

Obtained as yellow oil in 80 % yield (23.8 mg), **<sup>1</sup>H NMR** (400 MHz,  $\text{CDCl}_3$ )  $\delta$  (ppm) = 7.66–7.59 (m, 1H), 7.32–7.27 (m, 1H), 7.23 (t,  $J$  = 7.4 Hz, 1H), 7.18 (d,  $J$  = 7.5 Hz, 1H), 5.00 (m, 1H), 4.19 (m, 1H), 2.42 (t,  $J$  = 2.1 Hz, 3H), 1.28 (d,  $J$  = 6.6 Hz, 6H), 1.18 (d,  $J$  = 6.8 Hz, 6H); **<sup>13</sup>C NMR** (101 MHz,  $\text{CDCl}_3$ )  $\delta$  (ppm) = 174.1 (t,  $^2J_{\text{C-F}}$  = 29.4 Hz), 136.4 (t,  $^3J_{\text{C-F}}$  = 3.3 Hz), 133.5 (t,  $^2J_{\text{C-F}}$  = 23.6 Hz), 131.6, 130.0, 126.40 (t,  $^3J_{\text{C-F}}$  = 8.7 Hz), 125.6, 116.3 (t,  $^1J_{\text{C-F}}$  = 251.1 Hz), 54.2, 51.2, 22.7, 20.0 (d,  $^4J_{\text{C-F}}$  = 2.4 Hz), 18.6; **<sup>19</sup>F NMR** (376 MHz,  $\text{CDCl}_3$ )  $\delta$  (ppm) = -100.9; **IR (ATR):**  $\tilde{\nu}$  1698, 1655, 1326, 1295, 1274, 1233, 1156, 1078, 809, 797, 748  $\text{cm}^{-1}$ ; **HRMS (ESI/QTOF)**  $[\text{M} + \text{Na}]^+$  Calcd for  $\text{C}_{15}\text{H}_{21}\text{F}_2\text{N}_3\text{NaO}^+$  320.1545; Found 320.1544; **R<sub>f</sub>**: 0.70 (1:3 EtOAc/pentane).

(E)-1-(3,3-diisopropyltriaz-1-en-1-yl)-2,2-difluoro-2-(thiophen-2-yl)ethan-1-one (6h):

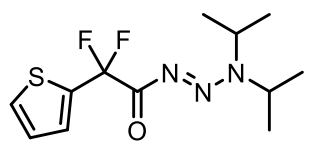

Obtained as yellow oil in 59 % yield (17.0 mg), **<sup>1</sup>H NMR** (400 MHz,  $\text{CDCl}_3$ )  $\delta$  (ppm) = 7.42 (dd,  $J$  = 5.1, 1.2 Hz, 1H), 7.39 (dt,  $J$  = 2.9, 1.5 Hz, 1H), 7.05–7.01 (m, 1H), 5.30 (m, 1H), 4.26 (m, 1H), 1.39 (d,  $J$  = 6.6 Hz, 6H), 1.32 (d,  $J$  = 6.8 Hz, 6H); **<sup>13</sup>C NMR** (101 MHz,  $\text{CDCl}_3$ )  $\delta$  (ppm) = 173.0 (t,  $^2J_{\text{C-F}}$  = 29.1 Hz), 136.5 (t,  $^2J_{\text{C-F}}$  = 30.6 Hz), 128.3, 128.1 (t,  $^3J_{\text{C-F}}$  = 5.6 Hz), 126.9, 114.0 (t,  $^1J_{\text{C-F}}$  = 250.1 Hz), 53.9, 51.2, 23.0, 18.9; **<sup>19</sup>F NMR** (376 MHz,  $\text{CDCl}_3$ )  $\delta$  (ppm) = -92.3; **IR (ATR):**  $\tilde{\nu}$  2930, 1698, 1432, 1335, 1260, 1241, 1098, 1042,

1012, 717, 456, 418  $\text{cm}^{-1}$ ; **HRMS (ESI/QTOF)**  $m/z$ :  $[\text{M} + \text{Na}]^+$  Calcd for  $\text{C}_{12}\text{H}_{17}\text{F}_2\text{N}_3\text{NaOS}^+$  312.0953; Found 312.0958; **R<sub>f</sub>**: 0.70 (1:3 EtOAc/pentane).

(E)-2,2-difluoro-2-phenyl-1-(piperidin-1-yl)diazenylethan-1-one (6i):

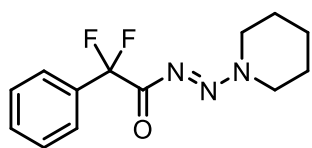

Obtained as yellow oil in 79 % yield (21.0 mg), **<sup>1</sup>H NMR** (400 MHz,  $\text{CDCl}_3$ )  $\delta$  (ppm) = 7.66 (dd,  $J = 7.5, 2.2$  Hz, 2H), 7.45–7.37 (m, 3H), 4.08–4.03 (m, 2H), 4.00–3.93 (m, 2H), 1.88–1.81 (m, 2H), 1.77 (ddd,  $J = 10.6, 8.3, 4.6$  Hz, 2H), 1.71 (q,  $J = 6.1$  Hz, 2H); **<sup>13</sup>C NMR** (101 MHz,  $\text{CDCl}_3$ )  $\delta$  (ppm) = 174.8 (t,  $^2J_{\text{C-F}} = 30.1$  Hz), 134.6 (t,  $^2J_{\text{C-F}} = 26.0$  Hz), 130.4, 128.4, 125.9 (t,  $^3J_{\text{C-F}} = 6.1$  Hz), 115.6 (t,  $^1J_{\text{C-F}} = 251.4$  Hz), 55.9, 46.5, 26.6, 25.1, 23.7; **<sup>19</sup>F NMR** (376 MHz,  $\text{CDCl}_3$ )  $\delta$  (ppm) = -104.0; **IR (ATR):**  $\tilde{\nu}$  2950, 1644, 1452, 1397, 1261, 1123, 1058, 814, 700, 677  $\text{cm}^{-1}$ ; **HRMS (ESI/QTOF)**  $m/z$ :  $[\text{M} + \text{H}]^+$  Calcd for  $\text{C}_{14}\text{H}_{15}\text{F}_2\text{O}_3^+$  268.1256; Found 268.1256; **R<sub>f</sub>**: 0.18 (1:3 EtOAc/pentane).

(E)-2-cyclopropyl-1-(3,3-diisopropyltriaz-1-en-1-yl)-2,2-difluoroethan-1-one (6j):

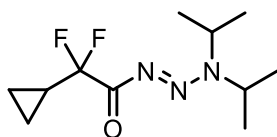

Obtained as yellow oil in 89 % yield (22.0 mg), **<sup>1</sup>H NMR** (400 MHz,  $\text{CDCl}_3$ )  $\delta$  (ppm) = 5.27 (hept,  $J = 6.8$  Hz, 1H), 4.29 (hept,  $J = 6.6$  Hz, 1H), 1.72–1.55 (m, 1H), 1.44 (d,  $J = 6.7$  Hz, 6H), 1.34 (d,  $J = 6.9$  Hz, 6H), 0.86–0.77 (m, 2H), 0.69–0.58 (m, 2H); **<sup>13</sup>C NMR** (101 MHz,  $\text{CDCl}_3$ )  $\delta$  (ppm) = 174.4 (t,  $^2J_{\text{C-F}} = 29.5$  Hz), 117.0 (t,  $^1J_{\text{C-F}} = 248.7$  Hz), 53.8, 50.9, 23.1, 18.8, 14.6 (t,  $^2J_{\text{C-F}} = 28.2$  Hz), 1.55 (t,  $^3J_{\text{C-F}} = 4.3$  Hz); **<sup>19</sup>F NMR** (376 MHz,  $\text{CDCl}_3$ )  $\delta$  (ppm) = -110.4; **IR (ATR):**  $\tilde{\nu}$  2982, 1698, 1653, 1470, 1444, 1385, 1372, 1337, 1302, 1262, 1216, 1187, 1157, 1134, 1095, 1071, 1004, 920, 857  $\text{cm}^{-1}$ ; **HRMS (ESI/QTOF)**  $m/z$ :  $[\text{M} + \text{Na}]^+$  Calcd for  $\text{C}_{11}\text{H}_{19}\text{F}_2\text{N}_3\text{NaO}^+$  270.1388; Found 270.1398; **R<sub>f</sub>**: 0.60 (1:4 EtOAc/pentane).

(E)-2-cyclopentyl-1-(3,3-diisopropyltriaz-1-en-1-yl)-2,2-difluoroethan-1-one (6k):

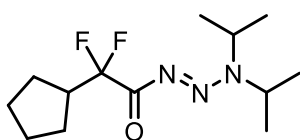

Obtained as yellow oil in 84 % yield (23.2 mg), **<sup>1</sup>H NMR** (400 MHz,  $\text{CDCl}_3$ )  $\delta$  (ppm) = 5.25 (m, 1H), 4.27 (m, 1H), 2.75 (m, 1H), 1.81–1.62 (m, 6H), 1.61–1.51 (m, 2H), 1.44 (d,  $J = 6.6$  Hz, 6H), 1.33 (d,  $J = 6.8$  Hz, 6H); **<sup>13</sup>C NMR** (101 MHz,  $\text{CDCl}_3$ )  $\delta$  (ppm) = 174.8 (t,  $^2J_{\text{C-F}} = 28.3$  Hz), 119.5 (t,  $^1J_{\text{C-F}} = 250.9$  Hz), 53.7, 50.9, 43.6 (t,  $^2J_{\text{C-F}} = 22.9$  Hz), 26.2, 26.0 (t,  $^3J_{\text{C-F}} = 3.8$  Hz), 23.0, 18.9; **<sup>19</sup>F NMR** (376 MHz,  $\text{CDCl}_3$ )  $\delta$  (ppm) = -111.8; **IR (ATR):**  $\tilde{\nu}$  2965, 1697, 1444, 1371, 1336, 1300, 1250, 1207, 1156, 1133,

1099, 1061, 1002, 925  $\text{cm}^{-1}$ ; **HRMS (ESI/QTOF)**  $m/z$ :  $[\text{M} + \text{Na}]^+$  Calcd for  $\text{C}_{13}\text{H}_{23}\text{F}_2\text{N}_3\text{NaO}^+$  298.1701; Found 298.1708; **R<sub>f</sub>**: 0.54 (1:3 EtOAc/pentane).

(E)-1-(3,3-diisopropyltriaz-1-en-1-yl)-2,2-difluoro-3,3-dimethylbutan-1-one (6l):

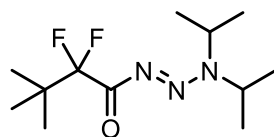

Obtained as white solid in 63 % yield (16.7 mg), **<sup>1</sup>H NMR** (400 MHz,  $\text{CDCl}_3$ )  $\delta$  (ppm) = 5.16 (hept,  $J = 6.8$  Hz, 1H), 4.28 (hept,  $J = 6.6$  Hz, 1H), 1.44 (d,  $J = 6.6$  Hz, 6H), 1.33 (d,  $J = 6.8$  Hz, 6H), 1.13 (s, 9H); **<sup>13</sup>C NMR** (101 MHz,  $\text{CDCl}_3$ )  $\delta$  (ppm) = 174.7 (t,  $^2J_{\text{C-F}} = 28.3$  Hz), 120.8 (t,  $^1J_{\text{C-F}} = 255.1$  Hz), 54.0, 51.1, 37.8 (t,  $^2J_{\text{C-F}} = 22.5$  Hz), 24.2 (t,  $^3J_{\text{C-F}} = 4.0$  Hz), 23.0, 18.9; **<sup>19</sup>F NMR** (376 MHz,  $\text{CDCl}_3$ )  $\delta$  (ppm) = -115.5; **IR (ATR):**  $\tilde{\nu}$  2968, 1699, 1445, 1370, 1250, 1156, 1120, 1096, 1061, 929  $\text{cm}^{-1}$ ; **HRMS (ESI/QTOF)**  $m/z$ :  $[\text{M} + \text{Na}]^+$  Calcd for  $\text{C}_{12}\text{H}_{23}\text{F}_2\text{N}_3\text{NaO}^+$  286.1701; Found 286.1709; **R<sub>f</sub>**: 0.41 (1:4 EtOAc/pentane).

(E)-1-(3,3-diisopropyltriaz-1-en-1-yl)-2,2-difluoro-3-methoxypropan-1-one (6m):

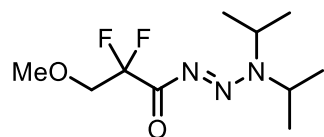

Obtained as yellow oil in 39 % yield (9.9 mg), **<sup>1</sup>H NMR** (400 MHz,  $\text{CDCl}_3$ )  $\delta$  (ppm) = 5.32 (m, 1H), 4.29 (m, 1H), 3.95 (t,  $J = 13.3$  Hz, 2H), 3.48 (s, 3H), 1.44 (d,  $J = 6.6$  Hz, 6H), 1.34 (d,  $J = 6.8$  Hz, 6H); **<sup>13</sup>C NMR** (101 MHz,  $\text{CDCl}_3$ )  $\delta$  (ppm) = 173.1 (t,  $^2J_{\text{C-F}} = 25.9$  Hz), 115.9 (t,  $^1J_{\text{C-F}} = 253.3$  Hz), 72.5 (t,  $^2J_{\text{C-F}} = 27.8$  Hz), 60.4, 53.8, 51.0, 23.1, 18.9; **<sup>19</sup>F NMR** (376 MHz,  $\text{CDCl}_3$ )  $\delta$  (ppm) = -112.5; **IR (ATR):**  $\tilde{\nu}$  2093, 2926, 2854, 1703, 1647, 1469, 1397, 1339, 1297, 1260, 1208, 1153, 1100, 1016  $\text{cm}^{-1}$ ; **HRMS (ESI/QTOF)**  $m/z$ :  $[\text{M} + \text{Na}]^+$  Calcd for  $\text{C}_{10}\text{H}_{19}\text{F}_2\text{N}_3\text{NaO}_2^+$  274.1338; Found 274.1344; **R<sub>f</sub>**: 0.68 (1:4 EtOAc/pentane).

(E)-1-(3,3-diisopropyltriaz-1-en-1-yl)-2-fluoro-2-phenylethan-1-one (8b):

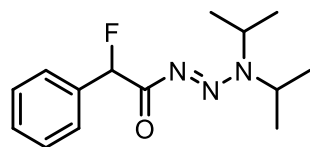

Isolated from reaction crude during optimizations. Obtained as yellow oil. **<sup>1</sup>H NMR** (400 MHz,  $\text{CDCl}_3$ )  $\delta$  (ppm) = 7.46 (dt,  $J = 7.7, 1.9$  Hz, 2H), 7.40–7.31 (m, 3H), 6.38 (d,  $J = 49.6$  Hz, 1H), 5.34 (hept,  $J = 6.8$  Hz, 1H), 4.12 (hept,  $J = 6.5$  Hz, 1H), 1.36 (d,  $J = 6.6$  Hz, 3H), 1.22 (d,  $J = 6.8$  Hz, 3H), 1.17 (d,  $J = 6.8$  Hz, 3H), 1.12 (d,  $J = 6.6$  Hz, 3H); **<sup>13</sup>C NMR** (101 MHz,  $\text{CDCl}_3$ )  $\delta$  (ppm) = 180.4 (d,  $^2J_{\text{C-F}} = 21.9$  Hz), 135.8 (d,  $^2J_{\text{C-F}} = 19.6$  Hz), 129.3 (d,  $^3J_{\text{C-F}} = 2.9$  Hz), 128.7, 128.0 (d,  $^3J_{\text{C-F}} = 5.0$  Hz), 91.2 (d,  $^1J_{\text{C-F}} = 180.5$  Hz), 52.0, 49.5, 23.4, 23.1, 18.90; **<sup>19</sup>F NMR** (376 MHz,  $\text{CDCl}_3$ )  $\delta$  (ppm) = -174.2; **IR (ATR):**  $\tilde{\nu}$  2978, 1702, 1468, 1455, 1431, 1343, 1328, 1285, 1268, 1219, 1170, 1134, 1098, 1041, 1012, 767,

739, 698, 609  $\text{cm}^{-1}$ ; **HRMS (ESI/QTOF)**  $m/z$ :  $[\text{M} + \text{Na}]^+$  Calcd for  $\text{C}_{14}\text{H}_{20}\text{FN}_3\text{NaO}^+$  288.1483; Found 288.1483; **R<sub>f</sub>**: 0.33 (2:3 EtOAc/pentane).

## 6. Product Derivatizations:

### Methyl 2,2-difluoro-2-(naphthalen-1-yl)acetate (11a):

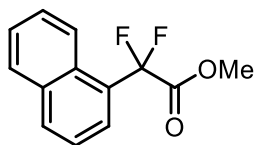

**6a** (0.10 mmol, 35.5 mg, 1.0 eq.) was dissolved in 1.0 mL MeOH, followed by 0.12 mL  $\text{BF}_3 \cdot \text{OEt}_2$  (10.0 eq.). Reaction mixture was stirred at 60 °C for 2 h. After completion of reaction, the mixture was concentrated under reduced pressure. Crude was then purified by silica gel chromatography eluting with pentane/EtOAc to afford the product.

Obtained as white solid in 80 % yield (18.9 mg),  **$^1\text{H NMR}$**  (400 MHz,  $\text{CDCl}_3$ )  $\delta$  (ppm) = 8.18 (d,  $J = 8.3$  Hz, 1H), 7.99 (d,  $J = 8.3$  Hz, 1H), 7.93–7.89 (m, 1H), 7.87 (d,  $J = 7.3$  Hz, 1H), 7.56 (tt,  $J = 10.0, 6.6$  Hz, 3H), 3.82 (s, 3H);  **$^{13}\text{C NMR}$**  (101 MHz,  $\text{CDCl}_3$ )  $\delta$  (ppm) = 165.1 (t,  $^2J_{\text{C-F}} = 35.2$  Hz), 134.0, 132.2, 129.5, 129.1, 128.4 (t,  $^2J_{\text{C-F}} = 23.2$  Hz), 127.6, 126.5, 125.04 (t,  $^3J_{\text{C-F}} = 9.4$  Hz), 124.7, 124.3, 114.5 (t,  $^1J_{\text{C-F}} = 251.5$  Hz), 53.9;  **$^{19}\text{F NMR}$**  (376 MHz,  $\text{CDCl}_3$ )  $\delta$  (ppm) = -99.96. The spectra obtained fit with reported literature.<sup>3</sup>

### 2,2-Difluoro-1-mesityl-2-phenylethan-1-one (12b):

**6a** (0.10 mmol, 35.5 mg, 1.0 eq.) was dissolved in 1.0 mL *p*-xylene, followed by 0.12 mL  $\text{BF}_3 \cdot \text{OEt}_2$  (10.0 eq.). Reaction mixture was stirred at 60 °C for 2 h. After completion of reaction, the mixture was concentrated under reduced pressure. Crude was then purified by silica gel chromatography eluting with pentane/EtOAc to afford the product.

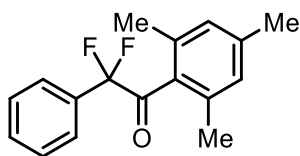

Obtained a colourless oil in 92 % yield (28.4 mg),  **$^1\text{H NMR}$**  (400 MHz,  $\text{CDCl}_3$ )  $\delta$  (ppm) = 8.10 (d,  $J = 7.8$  Hz, 2H), 7.63 (t,  $J = 7.2$  Hz, 1H), 7.48 (t,  $J = 7.8$  Hz, 2H), 6.90 (s, 2H), 2.33 (t,  $J = 4.0$  Hz, 6H), 2.30 (s, 3H);  **$^{19}\text{F NMR}$**  (376 MHz,  $\text{CDCl}_3$ )  $\delta$  (ppm) = -89.9. The spectra obtained fit with reported literature.<sup>4</sup>

## 7. Control Experiments:

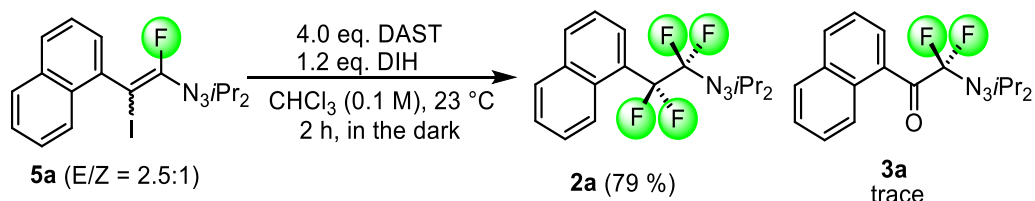

**5a** (0.10 mmol, 42.5 mg, 1.0 eq.) and DIH (0.12 mmol, 45.6 mg, 1.2 eq.) were weighed in Falcon tube containing a magnetic stirring bar. Addition of  $\text{CHCl}_3$  (1.0 mL) at RT was immediately followed by addition of DAST (0.40 mmol, 52.8  $\mu\text{L}$ , 4.0 eq.) *via* a micro pipette. The mixture was stirred at RT for 2 h, in the dark with aluminium foil. After completion of reaction, the mixture was concentrated under reduced pressure. Crude was then purified by silica gel chromatography eluting with pentane/EtOAc to afford product **2a** in 79 % yield (28.0 mg). Trace amount of **3a** was observed on crude NMR.

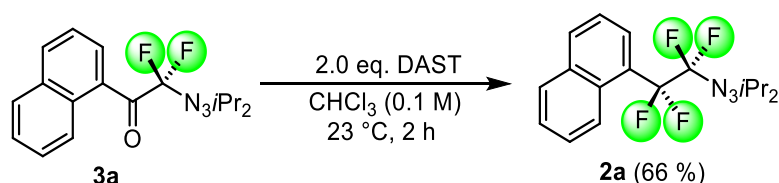

**3a** (0.10 mmol, 33.3 mg, 1.0 eq.) was weighed in Falcon tube containing a magnetic stirring bar. Addition of  $\text{CHCl}_3$  (1.0 mL) at RT was immediately followed by addition of DAST (0.20 mmol, 26.4  $\mu\text{L}$ , 2.0 eq.) *via* a micro pipette. The mixture was stirred at RT for 2 h. After completion of reaction, the mixture was concentrated under reduced pressure. Crude was then purified by silica gel chromatography eluting with pentane/EtOAc to afford product **2a** in 66 % yield (23.4 mg).

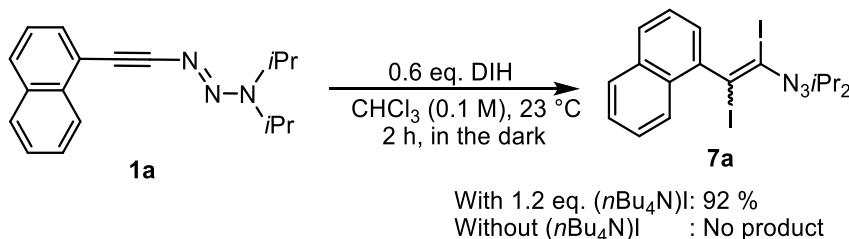

Alkynyl triazene **1a** (0.10 mmol, 27.9 mg, 1.0 eq.),  $(n\text{Bu}_4\text{N})\text{I}$  (0.12 mmol, 44.3 mg, 1.2 eq.) and DIH (0.06 mmol, 22.8 mg, 0.6 eq.) were weighed in Falcon tube containing a magnetic stirring bar.  $\text{CHCl}_3$  (1.0 mL) was added at RT. The mixture was stirred at RT for 2 h in the dark with aluminium foil. After completion of reaction, the mixture was

concentrated under reduced pressure. Crude was then purified by silica gel chromatography eluting with pentane/EtOAc to afford **7a** in 92 % yield (48.8 mg). When no (*n*Bu<sub>4</sub>N)I was added, full decomposition of **1a** was observed with no defined product formed.

1-(1,2-diiodo-2-(naphthalen-1-yl)vinyl)-3,3-diisopropyltriazen-1-ene (**7a**):

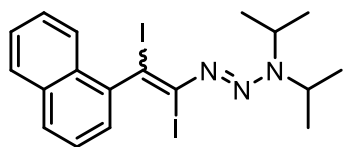

Obtained as yellow oil. <sup>1</sup>H NMR (400 MHz, CDCl<sub>3</sub>) δ (ppm) = 7.98 (d, *J* = 8.3 Hz, 1H), 7.92–7.83 (m, 2H), 7.58–7.41 (m, 4H), 5.14 (hept, *J* = 6.8 Hz, 1H), 4.10 (hept, *J* = 6.6 Hz, 1H), 1.44 (dd, *J* = 6.6, 2.9 Hz, 6H), 1.40 (dd, *J* = 6.8, 3.3 Hz, 6H); <sup>13</sup>C NMR (101 MHz, CDCl<sub>3</sub>) δ (ppm) = 143.0, 134.0, 130.8, 128.6, 128.5, 127.9, 126.3, 126.3, 126.2, 125.8, 118.8, 82.0, 51.5, 51.4, 23.8, 23.8, 19.2, 19.1; IR (ATR):  $\tilde{\nu}$  2974, 1463, 1415, 1382, 1365, 1275, 801, 781, cm<sup>-1</sup>; HRMS (ESI/QTOF) *m/z*: [M + H]<sup>+</sup> Calcd for C<sub>18</sub>H<sub>22</sub>I<sub>2</sub>N<sub>3</sub><sup>+</sup> 533.9898; Found 533.9910; R<sub>f</sub>: 0.88 (1:9 EtOAc/pentane).

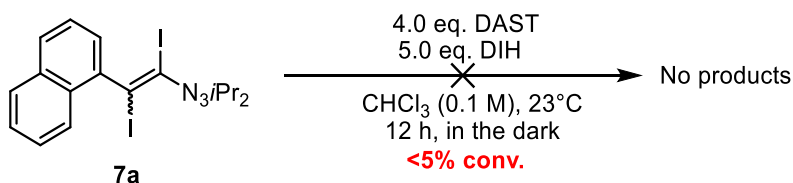

**7a** (0.08 mmol, 42.7 mg, 1.0 eq.), and DIH (0.40 mmol, 152.0 mg, 5.0 eq.) were weighed in Falcon tube containing a magnetic stirring bar. Addition of CHCl<sub>3</sub> (1.0 mL) at RT was immediately followed by addition of DAST (0.32 mmol, 42.3 μL, 4.0 eq.) *via* a micro pipette. The mixture was stirred at RT for 12 h, in the dark with aluminium foil. After completion of reaction, the mixture was concentrated under reduced pressure. Crude was then purified by silica gel chromatography eluting with pentane/EtOAc to recover >95 % **7a**.



## 8. X-ray Structures:

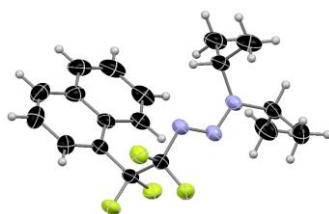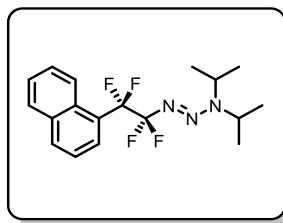

| Compound                                       | 2a                                                            |
|------------------------------------------------|---------------------------------------------------------------|
| Formula                                        | C <sub>18</sub> H <sub>21</sub> F <sub>4</sub> N <sub>3</sub> |
| <i>D</i> <sub>calc.</sub> / g cm <sup>-3</sup> | 1.340                                                         |
| <i>μ</i> /mm <sup>-1</sup>                     | 0.941                                                         |
| Formula Weight                                 | 355.38                                                        |
| Colour                                         | colourless                                                    |
| Shape                                          | prism                                                         |
| Size/mm <sup>3</sup>                           | 0.36×0.25×0.11                                                |
| <i>T</i> /K                                    | 140.00(10)                                                    |
| Crystal System                                 | monoclinic                                                    |
| Space Group                                    | <i>P</i> 2 <sub>1</sub> / <i>n</i>                            |
| <i>a</i> /Å                                    | 9.21581(8)                                                    |
| <i>b</i> /Å                                    | 14.44752(14)                                                  |
| <i>c</i> /Å                                    | 13.23644(14)                                                  |
| <i>α</i> /°                                    | 90                                                            |
| <i>β</i> /°                                    | 91.4811(9)                                                    |
| <i>γ</i> /°                                    | 90                                                            |
| <i>V</i> /Å <sup>3</sup>                       | 1761.79(3)                                                    |
| <i>Z</i>                                       | 4                                                             |
| <i>Z</i> '                                     | 1                                                             |
| Wavelength/Å                                   | 1.54184                                                       |
| Radiation type                                 | CuK $\alpha$                                                  |
| <i>θ</i> <sub>min</sub> /°                     | 4.531                                                         |
| <i>θ</i> <sub>max</sub> /°                     | 76.037                                                        |
| Measured Refl's.                               | 18746                                                         |
| Indep't Refl's                                 | 3665                                                          |
| Refl's I $\geq$ 2 $\sigma$ (I)                 | 3433                                                          |
| <i>R</i> <sub>int</sub>                        | 0.0214                                                        |
| Parameters                                     | 230                                                           |
| Restraints                                     | 0                                                             |
| Largest Peak/e Å <sup>-3</sup>                 | 0.285                                                         |
| Deepest Hole/e Å <sup>-3</sup>                 | -0.213                                                        |
| Goof                                           | 1.019                                                         |
| <i>wR</i> <sub>2</sub> (all data)              | 0.1065                                                        |
| <i>wR</i> <sub>2</sub>                         | 0.1043                                                        |
| <i>R</i> <sub>1</sub> (all data)               | 0.0397                                                        |
| <i>R</i> <sub>1</sub>                          | 0.0378                                                        |

## Reflection Statistics

|                                     |                                                                |                               |                |
|-------------------------------------|----------------------------------------------------------------|-------------------------------|----------------|
| Total reflections (after filtering) | 19120                                                          | Unique reflections            | 3665           |
| Completeness                        | 0.994                                                          | Mean $I/\sigma$               | 37.26          |
| $hkl_{\max}$ collected              | (11, 17, 16)                                                   | $hkl_{\min}$ collected        | (-9, -18, -16) |
| $hkl_{\max}$ used                   | (11, 18, 16)                                                   | $hkl_{\min}$ used             | (-11, 0, 0)    |
| Lim $d_{\max}$ collected            | 100.0                                                          | Lim $d_{\min}$ collected      | 0.77           |
| $d_{\max}$ used                     | 14.45                                                          | $d_{\min}$ used               | 0.79           |
| Friedel pairs                       | 2692                                                           | Friedel pairs merged          | 1              |
| Inconsistent equivalents            | 0                                                              | $R_{\text{int}}$              | 0.0214         |
| $R_{\text{sigma}}$                  | 0.0148                                                         | Intensity transformed         | 0              |
| Omitted reflections                 | 0                                                              | Omitted by user (OMIT $hkl$ ) | 0              |
| Multiplicity                        | (5105, 2803, 1133, 398, 216, 108, 56, 55, 29, 26, 11, 9, 4, 4) | Maximum multiplicity          | 19             |
| Removed systematic absences         | 374                                                            | Filtered off (Shel/OMIT)      | 0              |

**Table 1:** Fractional Atomic Coordinates ( $\times 10^4$ ) and Equivalent Isotropic Displacement Parameters ( $\text{\AA}^2 \times 10^3$ ) for **2a**.  $U_{\text{eq}}$  is defined as 1/3 of the trace of the orthogonalised  $U_{ij}$ .

| Atom | x          | y          | z           | $U_{\text{eq}}$ |
|------|------------|------------|-------------|-----------------|
| F1   | 8272.3(7)  | 5216.0(5)  | 8664.7(5)   | 43.59(19)       |
| F2   | 7384.6(8)  | 4308.7(5)  | 7491.6(5)   | 41.87(18)       |
| F3   | 8510.5(7)  | 6614.7(5)  | 7396.5(5)   | 42.82(18)       |
| F4   | 9523.7(7)  | 5352.5(6)  | 6876.9(6)   | 46.8(2)         |
| N1   | 5953.0(10) | 5473.3(7)  | 7954.3(7)   | 34.0(2)         |
| N2   | 5856.0(10) | 6078.5(7)  | 8656.7(7)   | 34.1(2)         |
| N3   | 4546.0(10) | 6369.7(7)  | 8832.6(8)   | 38.1(2)         |
| C1   | 7417.8(12) | 5206.4(8)  | 7812.8(8)   | 34.4(2)         |
| C2   | 8199.5(11) | 5768.7(8)  | 6995.9(9)   | 35.1(2)         |
| C3   | 7398.9(12) | 5821.5(8)  | 5989.0(8)   | 34.7(2)         |
| C4   | 7661.9(15) | 5113.1(9)  | 5328.1(10)  | 43.7(3)         |
| C5   | 6946.6(18) | 5063.4(11) | 4375.8(10)  | 54.6(3)         |
| C6   | 5974.2(17) | 5725.7(11) | 4097.2(10)  | 52.6(3)         |
| C7   | 5665.6(13) | 6470.3(9)  | 4751.4(10)  | 43.2(3)         |
| C8   | 4646.9(14) | 7156.6(11) | 4450.0(11)  | 52.5(3)         |
| C9   | 4350.2(14) | 7885.7(11) | 5056.8(13)  | 57.1(4)         |
| C10  | 5059.0(15) | 7962.1(10) | 6012.6(12)  | 51.2(3)         |
| C11  | 6033.0(13) | 7305.4(9)  | 6343.3(10)  | 41.4(3)         |
| C12  | 6376.5(11) | 6534.8(8)  | 5721.1(9)   | 35.4(2)         |
| C13  | 4439.6(13) | 7060.4(9)  | 9651.6(10)  | 43.9(3)         |
| C14  | 5161.8(17) | 7959.0(10) | 9360.8(14)  | 60.1(4)         |
| C15  | 5040.6(17) | 6683.3(11) | 10649.7(11) | 55.6(4)         |
| C16  | 3229.1(12) | 6028.0(10) | 8286.9(10)  | 43.8(3)         |
| C17  | 2436.5(15) | 6816.7(12) | 7755.2(12)  | 56.1(4)         |
| C18  | 2255.7(15) | 5509.2(11) | 9015.5(13)  | 55.7(4)         |

**Table 2:** Anisotropic Displacement Parameters ( $\times 10^4$ ) for **2a**. The anisotropic displacement factor exponent takes the form:  $-2\pi^2[h^2a^{*2} \times U_{11} + \dots + 2hka^* \times b^* \times U_{12}]$

| Atom | $U_{11}$ | $U_{22}$ | $U_{33}$ | $U_{23}$ | $U_{13}$ | $U_{12}$ |
|------|----------|----------|----------|----------|----------|----------|
| F1   | 36.1(3)  | 57.8(4)  | 36.7(4)  | -0.3(3)  | -2.8(3)  | 9.2(3)   |
| F2   | 42.7(4)  | 35.9(4)  | 47.2(4)  | -1.3(3)  | 5.3(3)   | 6.2(3)   |
| F3   | 36.5(4)  | 45.5(4)  | 46.4(4)  | -5.3(3)  | -1.0(3)  | -8.5(3)  |
| F4   | 26.0(3)  | 65.3(5)  | 49.3(4)  | -2.2(3)  | 5.6(3)   | 8.6(3)   |
| N1   | 28.9(4)  | 38.4(5)  | 35.0(4)  | -1.4(4)  | 4.6(3)   | 1.5(3)   |
| N2   | 29.3(4)  | 36.4(5)  | 37.0(5)  | -0.6(4)  | 6.9(3)   | 0.7(3)   |
| N3   | 27.9(4)  | 43.4(5)  | 43.3(5)  | -7.0(4)  | 7.9(4)   | 0.6(4)   |
| C1   | 30.7(5)  | 38.3(6)  | 34.0(5)  | -2.5(4)  | 0.6(4)   | 4.5(4)   |
| C2   | 24.3(5)  | 41.2(6)  | 39.8(6)  | -3.9(4)  | 3.3(4)   | 1.9(4)   |
| C3   | 30.1(5)  | 39.2(6)  | 34.8(5)  | 0.0(4)   | 4.0(4)   | -2.6(4)  |
| C4   | 47.9(6)  | 43.5(6)  | 39.8(6)  | -2.8(5)  | 4.6(5)   | 2.6(5)   |
| C5   | 69.6(9)  | 53.9(8)  | 40.1(7)  | -8.7(6)  | 0.8(6)   | -4.2(7)  |
| C6   | 57.4(8)  | 62.3(8)  | 37.6(6)  | 1.2(6)   | -5.7(5)  | -13.8(6) |
| C7   | 34.9(6)  | 50.8(7)  | 43.9(6)  | 10.9(5)  | -1.1(5)  | -9.8(5)  |
| C8   | 37.2(6)  | 63.2(8)  | 56.6(8)  | 22.0(7)  | -4.7(5)  | -6.3(6)  |
| C9   | 34.7(6)  | 59.6(8)  | 77.3(10) | 30.3(7)  | 7.3(6)   | 4.3(6)   |
| C10  | 43.1(6)  | 41.9(7)  | 69.4(9)  | 10.6(6)  | 15.0(6)  | 5.0(5)   |
| C11  | 35.2(6)  | 40.0(6)  | 49.4(6)  | 3.3(5)   | 7.6(5)   | -0.5(4)  |
| C12  | 27.8(5)  | 38.3(6)  | 40.4(6)  | 4.3(4)   | 4.1(4)   | -5.2(4)  |
| C13  | 35.2(5)  | 43.9(6)  | 53.3(7)  | -12.3(5) | 13.8(5)  | 0.0(5)   |
| C14  | 55.1(8)  | 42.1(7)  | 84.0(11) | -11.5(7) | 21.3(8)  | -2.4(6)  |
| C15  | 57.6(8)  | 62.7(9)  | 47.1(7)  | -15.4(6) | 11.2(6)  | -1.1(6)  |
| C16  | 27.9(5)  | 53.9(7)  | 49.7(7)  | -8.7(5)  | 3.4(5)   | 1.1(5)   |
| C17  | 36.8(6)  | 73.2(10) | 58.5(8)  | 15.2(7)  | 3.8(6)   | -1.6(6)  |
| C18  | 37.8(6)  | 52.1(8)  | 77.2(10) | 9.1(7)   | 0.9(6)   | -6.5(5)  |

**Table 3:** Bond Lengths in Å for **2a**.

| Atom | Atom | Length/Å   | Atom | Atom | Length/Å   |
|------|------|------------|------|------|------------|
| F1   | C1   | 1.3587(13) | C5   | C6   | 1.356(2)   |
| F2   | C1   | 1.3649(13) | C6   | C7   | 1.415(2)   |
| F3   | C2   | 1.3599(13) | C7   | C8   | 1.4156(19) |
| F4   | C2   | 1.3732(12) | C7   | C12  | 1.4290(17) |
| N1   | N2   | 1.2812(13) | C8   | C9   | 1.357(2)   |
| N1   | C1   | 1.4210(13) | C9   | C10  | 1.413(2)   |
| N2   | N3   | 1.3051(13) | C10  | C11  | 1.3701(18) |
| N3   | C13  | 1.4785(15) | C11  | C12  | 1.4252(17) |
| N3   | C16  | 1.4809(15) | C13  | C14  | 1.5132(19) |
| C1   | C2   | 1.5455(16) | C13  | C15  | 1.520(2)   |
| C2   | C3   | 1.5085(15) | C16  | C17  | 1.517(2)   |
| C3   | C4   | 1.3720(17) | C16  | C18  | 1.5302(19) |
| C3   | C12  | 1.4347(16) |      |      |            |
| C4   | C5   | 1.4091(19) |      |      |            |

**Table 4:** Bond Angles in ° for **2a**.

| Atom | Atom | Atom | Angle/°    | Atom | Atom | Atom | Angle/°   |
|------|------|------|------------|------|------|------|-----------|
| N2   | N1   | C1   | 111.42(9)  | C13  | N3   | C16  | 120.90(9) |
| N1   | N2   | N3   | 115.57(9)  | F1   | C1   | F2   | 106.03(9) |
| N2   | N3   | C13  | 115.31(9)  | F1   | C1   | N1   | 114.84(9) |
| N2   | N3   | C16  | 123.76(10) | F1   | C1   | C2   | 107.74(9) |

| Atom | Atom | Atom | Angle/°    | Atom | Atom | Atom | Angle/°    |
|------|------|------|------------|------|------|------|------------|
| F2   | C1   | N1   | 106.57(9)  | C6   | C7   | C12  | 120.31(12) |
| F2   | C1   | C2   | 106.77(9)  | C8   | C7   | C12  | 119.52(13) |
| N1   | C1   | C2   | 114.27(9)  | C9   | C8   | C7   | 121.29(13) |
| F3   | C2   | F4   | 105.03(9)  | C8   | C9   | C10  | 119.67(12) |
| F3   | C2   | C1   | 107.28(9)  | C11  | C10  | C9   | 121.05(14) |
| F3   | C2   | C3   | 113.11(9)  | C10  | C11  | C12  | 120.65(13) |
| F4   | C2   | C1   | 106.36(9)  | C7   | C12  | C3   | 117.26(11) |
| F4   | C2   | C3   | 109.67(9)  | C11  | C12  | C3   | 124.93(11) |
| C3   | C2   | C1   | 114.74(9)  | C11  | C12  | C7   | 117.80(11) |
| C4   | C3   | C2   | 115.80(10) | N3   | C13  | C14  | 110.77(11) |
| C4   | C3   | C12  | 120.26(11) | N3   | C13  | C15  | 111.45(11) |
| C12  | C3   | C2   | 123.90(10) | C14  | C13  | C15  | 112.07(13) |
| C3   | C4   | C5   | 121.48(13) | N3   | C16  | C17  | 110.77(11) |
| C6   | C5   | C4   | 119.87(13) | N3   | C16  | C18  | 110.02(11) |
| C5   | C6   | C7   | 120.82(12) | C17  | C16  | C18  | 112.17(11) |
| C6   | C7   | C8   | 120.17(13) |      |      |      |            |

**Table 5:** Torsion Angles in ° for **2a**.

| Atom | Atom | Atom | Atom | Angle/°    |
|------|------|------|------|------------|
| F1   | C1   | C2   | F3   | -53.96(11) |
| F1   | C1   | C2   | F4   | 58.03(11)  |
| F1   | C1   | C2   | C3   | 179.47(9)  |
| F2   | C1   | C2   | F3   | -167.48(8) |
| F2   | C1   | C2   | F4   | -55.50(11) |
| F2   | C1   | C2   | C3   | 65.94(11)  |
| F3   | C2   | C3   | C4   | 148.93(10) |
| F3   | C2   | C3   | C12  | -33.36(14) |
| F4   | C2   | C3   | C4   | 32.07(14)  |
| F4   | C2   | C3   | C12  | -          |
|      |      |      |      | 150.23(10) |
| N1   | N2   | N3   | C13  | 179.36(10) |
| N1   | N2   | N3   | C16  | 1.12(16)   |
| N1   | C1   | C2   | F3   | 74.95(11)  |
| N1   | C1   | C2   | F4   | -173.07(9) |
| N1   | C1   | C2   | C3   | -51.63(13) |
| N2   | N1   | C1   | F1   | 32.44(13)  |
| N2   | N1   | C1   | F2   | 149.52(9)  |
| N2   | N1   | C1   | C2   | -92.79(11) |
| N2   | N3   | C13  | C14  | 66.62(15)  |
| N2   | N3   | C13  | C15  | -58.89(14) |
| N2   | N3   | C16  | C17  | -          |
|      |      |      |      | 120.88(13) |
| N2   | N3   | C16  | C18  | 114.54(13) |
| C1   | N1   | N2   | N3   | 179.46(9)  |
| C1   | C2   | C3   | C4   | -87.55(12) |
| C1   | C2   | C3   | C12  | 90.15(13)  |
| C2   | C3   | C4   | C5   | 177.85(12) |
| C2   | C3   | C12  | C7   | -          |
|      |      |      |      | 177.72(10) |
| C2   | C3   | C12  | C11  | 3.11(17)   |
| C3   | C4   | C5   | C6   | 0.0(2)     |
| C4   | C3   | C12  | C7   | -0.11(16)  |
| C4   | C3   | C12  | C11  | -          |
|      |      |      |      | 179.29(11) |
| C4   | C5   | C6   | C7   | 0.0(2)     |
| C5   | C6   | C7   | C8   | -          |
|      |      |      |      | 179.97(13) |
| C5   | C6   | C7   | C12  | -0.1(2)    |
| C6   | C7   | C8   | C9   | -          |
|      |      |      |      | 178.89(12) |

| Atom | Atom | Atom | Atom | Angle <sup>o</sup> |
|------|------|------|------|--------------------|
| C6   | C7   | C12  | C3   | 0.13(17)           |
| C6   | C7   | C12  | C11  | 179.37(11)         |
| C7   | C8   | C9   | C10  | -0.52(19)          |
| C8   | C7   | C12  | C3   | -                  |
|      |      |      |      | 179.99(10)         |
| C8   | C7   | C12  | C11  | -0.75(16)          |
| C8   | C9   | C10  | C11  | -0.69(19)          |
| C9   | C10  | C11  | C12  | 1.16(19)           |
| C10  | C11  | C12  | C3   | 178.76(11)         |
| C10  | C11  | C12  | C7   | -0.42(17)          |
| C12  | C3   | C4   | C5   | 0.05(19)           |
| C12  | C7   | C8   | C9   | 1.24(19)           |
| C13  | N3   | C16  | C17  | 60.98(15)          |
| C13  | N3   | C16  | C18  | -63.61(15)         |
| C16  | N3   | C13  | C14  | -                  |
|      |      |      |      | 115.09(13)         |
| C16  | N3   | C13  | C15  | 119.41(13)         |

**Table 6:** Hydrogen Fractional Atomic Coordinates ( $\times 10^4$ ) and Equivalent Isotropic Displacement Parameters ( $\text{\AA}^2 \times 10^3$ ) for **2a**.  $U_{eq}$  is defined as 1/3 of the trace of the orthogonalised  $U_{ij}$ .

| Atom | x       | y       | z        | $U_{eq}$ |
|------|---------|---------|----------|----------|
| H4   | 8341.38 | 4645.67 | 5516.71  | 52       |
| H5   | 7145.42 | 4566.65 | 3929.92  | 65       |
| H6   | 5494.07 | 5689.22 | 3454.62  | 63       |
| H8   | 4161.64 | 7105.55 | 3810.47  | 63       |
| H9   | 3669.27 | 8342.56 | 4840.11  | 68       |
| H10  | 4856.92 | 8476.98 | 6432.6   | 61       |
| H11  | 6483.92 | 7364.27 | 6993.64  | 50       |
| H13  | 3385.9  | 7193.8  | 9740.73  | 53       |
| H14A | 6199.68 | 7851.48 | 9267.17  | 90       |
| H14B | 5035.48 | 8416.83 | 9897.69  | 90       |
| H14C | 4718.11 | 8190.6  | 8729.22  | 90       |
| H15A | 4589.44 | 6084.06 | 10789.04 | 83       |
| H15B | 4825.99 | 7118.16 | 11194.11 | 83       |
| H15C | 6093.72 | 6604.63 | 10609.44 | 83       |
| H16  | 3543.45 | 5579.81 | 7760.01  | 53       |
| H17A | 2110.71 | 7264.28 | 8257.3   | 84       |
| H17B | 1593.96 | 6572.36 | 7375.06  | 84       |
| H17C | 3092.62 | 7122.91 | 7289.64  | 84       |
| H18A | 2811.53 | 5011.3  | 9346.74  | 84       |
| H18B | 1425.42 | 5244.52 | 8638.99  | 84       |
| H18C | 1906.75 | 5939.47 | 9527.52  | 84       |

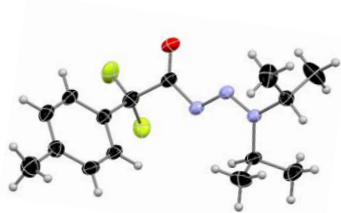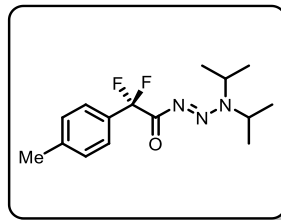

| Compound                                       | 6e                                                              |
|------------------------------------------------|-----------------------------------------------------------------|
| Formula                                        | C <sub>15</sub> H <sub>21</sub> F <sub>2</sub> N <sub>3</sub> O |
| <i>D</i> <sub>calc.</sub> / g cm <sup>-3</sup> | 1.215                                                           |
| $\mu$ /mm <sup>-1</sup>                        | 0.783                                                           |
| Formula Weight                                 | 297.35                                                          |
| Colour                                         | colourless                                                      |
| Shape                                          | prism-shaped                                                    |
| Size/mm <sup>3</sup>                           | 0.31×0.07×0.04                                                  |
| <i>T</i> /K                                    | 140.00(10)                                                      |
| Crystal System                                 | triclinic                                                       |
| Space Group                                    | <i>P</i> $\bar{1}$                                              |
| <i>a</i> /Å                                    | 9.5957(2)                                                       |
| <i>b</i> /Å                                    | 9.9111(3)                                                       |
| <i>c</i> /Å                                    | 10.2433(2)                                                      |
| $\alpha$ <sup>o</sup>                          | 104.216(2)                                                      |
| $\beta$ <sup>o</sup>                           | 114.117(2)                                                      |
| $\gamma$ <sup>o</sup>                          | 101.164(2)                                                      |
| <i>V</i> /Å <sup>3</sup>                       | 812.95(4)                                                       |
| <i>Z</i>                                       | 2                                                               |
| <i>Z</i> '                                     | 1                                                               |
| Wavelength/Å                                   | 1.54184                                                         |
| Radiation type                                 | CuK $\alpha$                                                    |
| $\theta$ <sub>min</sub> <sup>o</sup>           | 4.880                                                           |
| $\theta$ <sub>max</sub> <sup>o</sup>           | 75.125                                                          |
| Measured Refl's.                               | 12419                                                           |
| Indep't Refl's                                 | 3276                                                            |
| Refl's $\geq 2\sigma$ (I)                      | 3033                                                            |
| <i>R</i> <sub>int</sub>                        | 0.0085                                                          |
| Parameters                                     | 196                                                             |
| Restraints                                     | 0                                                               |
| Largest Peak/e Å <sup>-3</sup>                 | 0.232                                                           |
| Deepest Hole/e Å <sup>-3</sup>                 | -0.183                                                          |
| Goof                                           | 1.060                                                           |
| <i>wR</i> <sub>2</sub> (all data)              | 0.0948                                                          |
| <i>wR</i> <sub>2</sub>                         | 0.0931                                                          |
| <i>R</i> <sub>1</sub> (all data)               | 0.0378                                                          |
| <i>R</i> <sub>1</sub>                          | 0.0356                                                          |

**Table 7:** Fractional Atomic Coordinates ( $\times 10^4$ ) and Equivalent Isotropic Displacement Parameters ( $\text{\AA}^2 \times 10^3$ ) for **6e**.  $U_{eq}$  is defined as 1/3 of the trace of the orthogonalised  $U_{ij}$ .

| Atom | x          | y          | z           | $U_{eq}$ |
|------|------------|------------|-------------|----------|
| F1   | 4983.2(8)  | 2835.2(8)  | 8173.3(9)   | 40.6(2)  |
| F2   | 3189.6(10) | 729.2(8)   | 6420.5(10)  | 47.5(2)  |
| O1   | 2035.5(12) | 2115.2(9)  | 4565.5(10)  | 42.3(2)  |
| N1   | 3478.0(11) | 4398.2(10) | 6618.7(10)  | 25.6(2)  |
| N2   | 2894.0(10) | 5010.5(9)  | 5615.0(10)  | 24.8(2)  |
| N3   | 3392.5(10) | 6429.4(9)  | 6152.8(10)  | 24.2(2)  |
| C1   | 2869.7(13) | 2875.1(12) | 5909.6(13)  | 28.1(2)  |
| C2   | 3348.0(14) | 2154.9(12) | 7130.2(14)  | 32.1(3)  |
| C3   | 2368.0(13) | 2201.9(12) | 7958.7(13)  | 27.7(2)  |
| C4   | 1061.6(14) | 984.4(12)  | 7550.2(14)  | 32.5(3)  |
| C5   | 151.2(14)  | 1078.5(13) | 8302.7(14)  | 35.5(3)  |
| C6   | 510.2(15)  | 2372.2(13) | 9470.6(14)  | 34.6(3)  |
| C7   | 1810.3(14) | 3589.8(13) | 9852.9(13)  | 33.2(3)  |
| C8   | 2724.5(13) | 3512.4(12) | 9107.2(13)  | 29.8(2)  |
| C9   | -462.3(19) | 2467.2(17) | 10308.1(19) | 51.9(4)  |
| C10  | 4548.7(14) | 7346.6(12) | 7783.8(13)  | 32.3(3)  |
| C11  | 3625(2)    | 7932.5(17) | 8554.8(16)  | 52.9(4)  |
| C12  | 5909.2(17) | 8549.5(15) | 7928.8(17)  | 48.8(4)  |
| C13  | 2624.3(13) | 7118.2(12) | 5039.1(13)  | 29.1(2)  |
| C14  | 3259(2)    | 6979(2)    | 3899.8(18)  | 56.7(4)  |
| C15  | 797.0(16)  | 6474.9(18) | 4274.8(19)  | 51.7(4)  |

**Table 8:** Anisotropic Displacement Parameters ( $\times 10^4$ ) for **6e**. The anisotropic displacement factor exponent takes the form:  $-2\pi^2[h^2a^{*2} \times U_{11} + \dots + 2hka^* \times b^* \times U_{12}]$

| Atom | $U_{11}$ | $U_{22}$ | $U_{33}$ | $U_{23}$ | $U_{13}$ | $U_{12}$ |
|------|----------|----------|----------|----------|----------|----------|
| F1   | 26.3(3)  | 49.3(4)  | 50.5(4)  | 26.3(4)  | 17.4(3)  | 13.6(3)  |
| F2   | 67.1(5)  | 27.3(4)  | 68.9(5)  | 20.7(4)  | 44.9(5)  | 26.1(4)  |
| O1   | 50.5(5)  | 26.0(4)  | 34.2(5)  | 1.3(4)   | 14.7(4)  | 4.6(4)   |
| N1   | 24.4(4)  | 21.5(4)  | 27.7(5)  | 7.1(4)   | 10.7(4)  | 7.4(3)   |
| N2   | 21.7(4)  | 22.7(4)  | 26.7(4)  | 5.7(3)   | 10.9(4)  | 6.7(3)   |
| N3   | 22.7(4)  | 21.2(4)  | 24.6(4)  | 6.2(3)   | 9.1(4)   | 6.5(3)   |
| C1   | 25.4(5)  | 22.8(5)  | 32.7(6)  | 5.3(4)   | 14.1(5)  | 6.8(4)   |
| C2   | 31.3(6)  | 22.8(5)  | 41.8(6)  | 10.3(5)  | 16.8(5)  | 11.2(4)  |
| C3   | 24.7(5)  | 24.2(5)  | 30.9(6)  | 10.9(4)  | 9.7(4)   | 8.3(4)   |
| C4   | 32.7(6)  | 21.0(5)  | 35.6(6)  | 6.8(4)   | 12.7(5)  | 5.1(4)   |
| C5   | 30.2(6)  | 27.2(6)  | 41.4(7)  | 11.4(5)  | 14.5(5)  | 1.6(4)   |
| C6   | 32.7(6)  | 34.8(6)  | 35.9(6)  | 13.4(5)  | 16.5(5)  | 9.1(5)   |
| C7   | 32.9(6)  | 27.8(6)  | 28.3(6)  | 4.3(4)   | 10.2(5)  | 5.8(5)   |
| C8   | 23.1(5)  | 24.6(5)  | 30.0(6)  | 6.8(4)   | 6.3(4)   | 2.3(4)   |
| C9   | 55.9(9)  | 50.1(8)  | 59.4(9)  | 18.0(7)  | 39.6(8)  | 12.9(7)  |
| C10  | 34.7(6)  | 22.7(5)  | 24.5(5)  | 4.8(4)   | 4.9(5)   | 5.0(4)   |
| C11  | 71.6(10) | 48.9(8)  | 34.7(7)  | 6.2(6)   | 28.3(7)  | 18.2(7)  |
| C12  | 35.0(7)  | 37.6(7)  | 44.7(8)  | 9.2(6)   | 3.5(6)   | -4.0(5)  |
| C13  | 28.4(5)  | 29.3(5)  | 29.4(6)  | 13.2(4)  | 11.5(5)  | 11.1(4)  |
| C14  | 64.1(10) | 86.3(12) | 46.7(8)  | 39.3(8)  | 35.6(8)  | 40.1(9)  |
| C15  | 29.1(6)  | 60.3(9)  | 66.1(10) | 39.9(8)  | 12.5(6)  | 17.4(6)  |

**Table 9:** Bond Lengths in  $\text{\AA}$  for **6e**.

| Atom | Atom | Length/ $\text{\AA}$ | Atom | Atom | Length/ $\text{\AA}$ |
|------|------|----------------------|------|------|----------------------|
| F1   | C2   | 1.3873(14)           | N1   | N2   | 1.3064(13)           |
| F2   | C2   | 1.3675(13)           | N1   | C1   | 1.3860(13)           |
| O1   | C1   | 1.2084(14)           | N2   | N3   | 1.2859(12)           |

| Atom | Atom | Length/Å   |
|------|------|------------|
| N3   | C10  | 1.4823(13) |
| N3   | C13  | 1.4836(14) |
| C1   | C2   | 1.5426(16) |
| C2   | C3   | 1.5022(16) |
| C3   | C4   | 1.3929(15) |
| C3   | C8   | 1.3916(16) |
| C4   | C5   | 1.3830(17) |
| C5   | C6   | 1.3902(17) |

| Atom | Atom | Length/Å   |
|------|------|------------|
| C6   | C7   | 1.3970(17) |
| C6   | C9   | 1.5047(18) |
| C7   | C8   | 1.3798(17) |
| C10  | C11  | 1.5144(19) |
| C10  | C12  | 1.5164(18) |
| C13  | C14  | 1.5119(17) |
| C13  | C15  | 1.5146(17) |

**Table 10:** Bond Angles in ° for **6e**.

| Atom | Atom | Atom | Angle/°    |
|------|------|------|------------|
| N2   | N1   | C1   | 110.08(9)  |
| N3   | N2   | N1   | 115.20(8)  |
| N2   | N3   | C10  | 124.04(9)  |
| N2   | N3   | C13  | 115.03(8)  |
| C10  | N3   | C13  | 120.77(8)  |
| O1   | C1   | N1   | 129.90(11) |
| O1   | C1   | C2   | 120.21(10) |
| N1   | C1   | C2   | 109.84(9)  |
| F1   | C2   | C1   | 109.37(9)  |
| F1   | C2   | C3   | 110.07(9)  |
| F2   | C2   | F1   | 105.13(9)  |
| F2   | C2   | C1   | 108.08(9)  |
| F2   | C2   | C3   | 110.50(9)  |
| C3   | C2   | C1   | 113.34(9)  |
| C4   | C3   | C2   | 121.37(10) |

| Atom | Atom | Atom | Angle/°    |
|------|------|------|------------|
| C8   | C3   | C2   | 119.20(10) |
| C8   | C3   | C4   | 119.35(11) |
| C5   | C4   | C3   | 119.96(11) |
| C4   | C5   | C6   | 121.34(11) |
| C5   | C6   | C7   | 118.03(11) |
| C5   | C6   | C9   | 121.36(11) |
| C7   | C6   | C9   | 120.61(12) |
| C8   | C7   | C6   | 121.21(11) |
| C7   | C8   | C3   | 120.09(10) |
| N3   | C10  | C11  | 108.91(10) |
| N3   | C10  | C12  | 111.22(10) |
| C11  | C10  | C12  | 113.34(11) |
| N3   | C13  | C14  | 110.28(10) |
| N3   | C13  | C15  | 110.60(9)  |
| C14  | C13  | C15  | 112.82(12) |

**Table 11:** Torsion Angles in ° for **6e**.

| Atom | Atom | Atom | Atom | Angle/°     |
|------|------|------|------|-------------|
| F1   | C2   | C3   | C4   | -137.95(11) |
| F1   | C2   | C3   | C8   | 45.26(13)   |
| F2   | C2   | C3   | C4   | -22.27(15)  |
| F2   | C2   | C3   | C8   | 160.94(10)  |
| O1   | C1   | C2   | F1   | 134.86(11)  |
| O1   | C1   | C2   | F2   | 20.91(14)   |
| O1   | C1   | C2   | C3   | -101.92(12) |
| N1   | N2   | N3   | C10  | 0.18(14)    |
| N1   | N2   | N3   | C13  | -175.15(8)  |
| N1   | C1   | C2   | F1   | -47.42(12)  |
| N1   | C1   | C2   | F2   | -161.37(9)  |
| N1   | C1   | C2   | C3   | 75.80(11)   |
| N2   | N1   | C1   | O1   | 6.16(16)    |
| N2   | N1   | C1   | C2   | -171.28(8)  |
| N2   | N3   | C10  | C11  | -103.47(12) |
| N2   | N3   | C10  | C12  | 130.91(11)  |
| N2   | N3   | C13  | C14  | -73.44(13)  |
| N2   | N3   | C13  | C15  | 52.05(13)   |
| C1   | N1   | N2   | N3   | -179.50(8)  |
| C1   | C2   | C3   | C4   | 99.21(12)   |
| C1   | C2   | C3   | C8   | -77.58(13)  |
| C2   | C3   | C4   | C5   | -177.90(11) |
| C2   | C3   | C8   | C7   | 178.22(10)  |
| C3   | C4   | C5   | C6   | -0.01(19)   |
| C4   | C3   | C8   | C7   | 1.37(17)    |
| C4   | C5   | C6   | C7   | 0.87(19)    |
| C4   | C5   | C6   | C9   | -178.94(12) |
| C5   | C6   | C7   | C8   | -0.61(18)   |



| Atom | Atom | Atom | Atom | Angle/°     |
|------|------|------|------|-------------|
| C6   | C7   | C8   | C3   | -0.50(18)   |
| C8   | C3   | C4   | C5   | -1.12(17)   |
| C9   | C6   | C7   | C8   | 179.19(12)  |
| C10  | N3   | C13  | C14  | 111.07(13)  |
| C10  | N3   | C13  | C15  | -123.44(12) |
| C13  | N3   | C10  | C11  | 71.60(13)   |
| C13  | N3   | C10  | C12  | -54.02(14)  |

**Table 12:** Hydrogen Fractional Atomic Coordinates ( $\times 10^4$ ) and Equivalent Isotropic Displacement Parameters ( $\text{\AA}^2 \times 10^3$ ) for **6e**.  $U_{eq}$  is defined as 1/3 of the trace of the orthogonalised  $U_{ij}$ .

| Atom | x        | y       | z        | $U_{eq}$ |
|------|----------|---------|----------|----------|
| H4   | 796.23   | 89.88   | 6755.12  | 39       |
| H5   | -737.53  | 242.15  | 8015.72  | 43       |
| H7   | 2069.66  | 4487.67 | 10640.81 | 40       |
| H8   | 3598.52  | 4354.94 | 9378.13  | 36       |
| H9A  | 131.03   | 2376.61 | 11302.37 | 78       |
| H9B  | -1506.32 | 1667.15 | 9696.38  | 78       |
| H9C  | -644.92  | 3419.73 | 10470.84 | 78       |
| H10  | 5040.16  | 6690.8  | 8291.86  | 39       |
| H11A | 3141.34  | 8591.59 | 8087.59  | 79       |
| H11B | 4367.06  | 8478.8  | 9651.42  | 79       |
| H11C | 2767.8   | 7106.15 | 8424.35  | 79       |
| H12A | 6414.35  | 8108.55 | 7354.78  | 73       |
| H12B | 6720.12  | 9062.2  | 9012.9   | 73       |
| H12C | 5472.42  | 9255.03 | 7512.55  | 73       |
| H13  | 2942.81  | 8193.71 | 5626.09  | 35       |
| H14A | 4435.87  | 7461.93 | 4448.86  | 85       |
| H14B | 2755.92  | 7451.96 | 3181.78  | 85       |
| H14C | 2996.03  | 5932.87 | 3330.17  | 85       |
| H15A | 447.48   | 5421.12 | 3677.48  | 77       |
| H15B | 310.71   | 6984.08 | 3591.23  | 77       |
| H15C | 450.46   | 6603.22 | 5061.07  | 77       |

## 9. NMR Spectra:

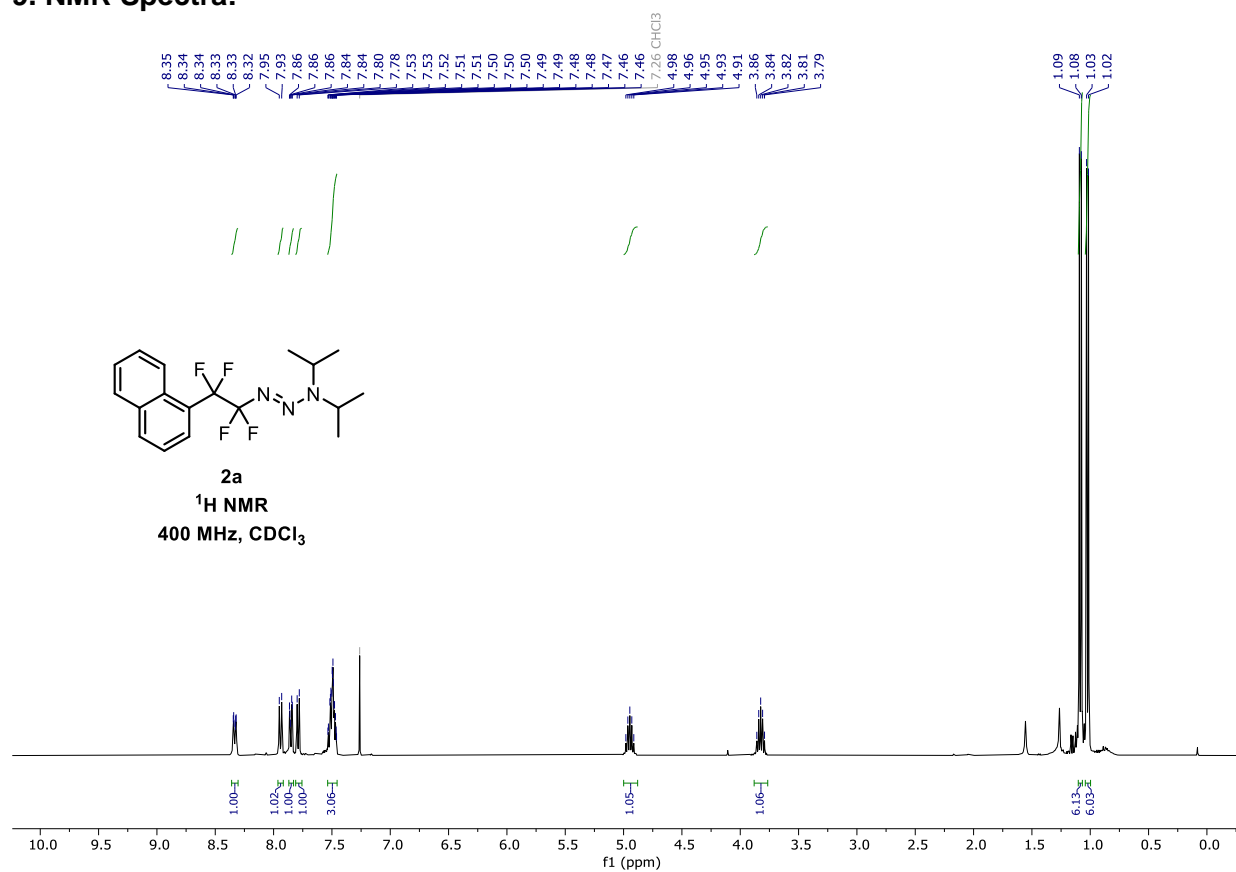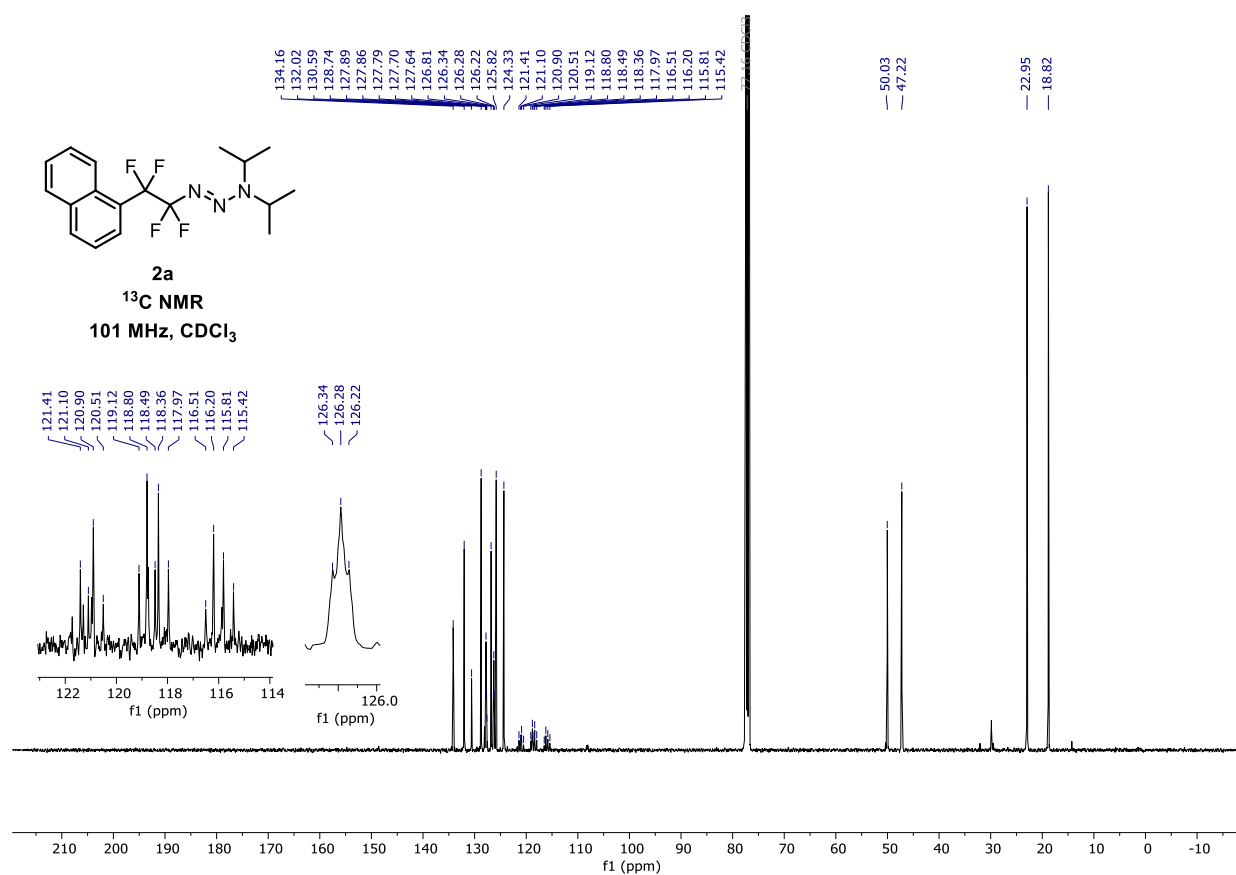

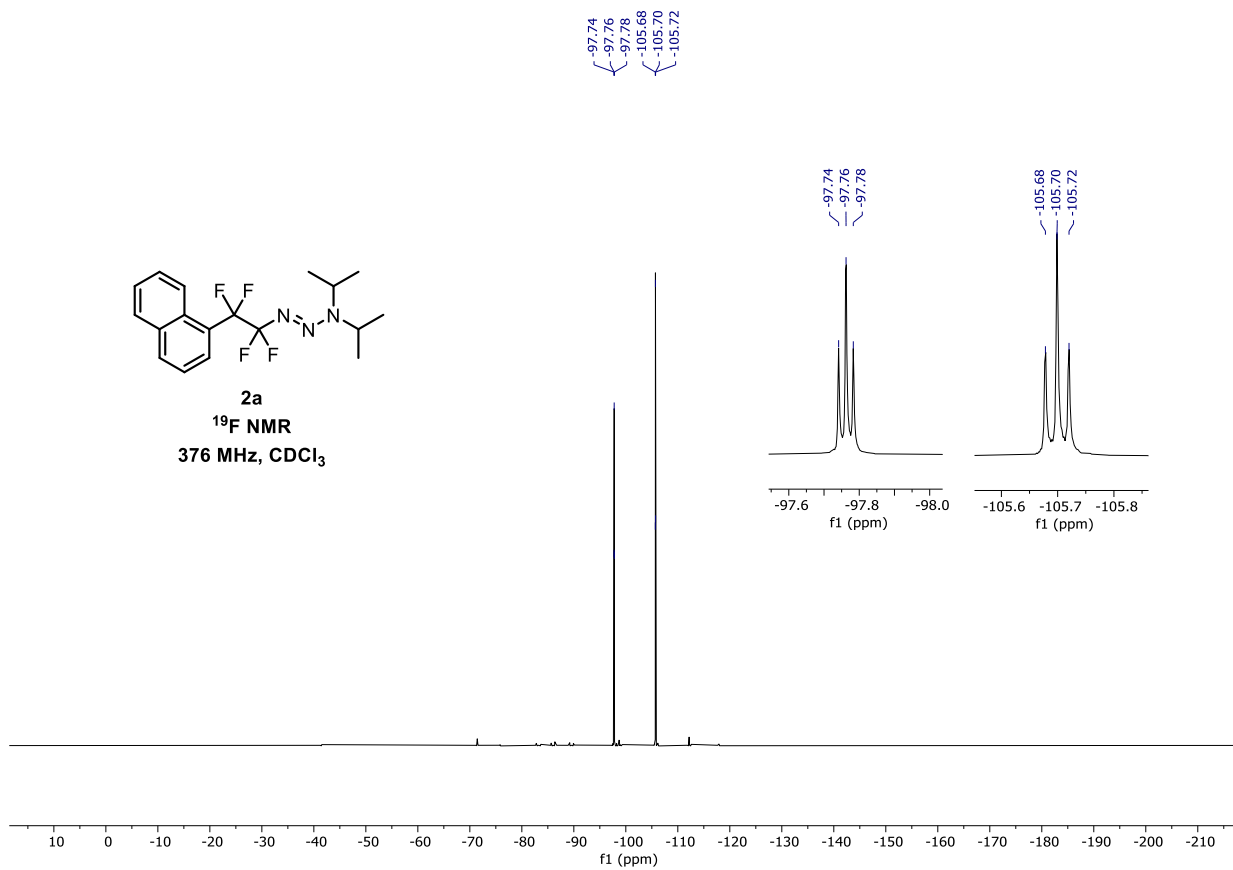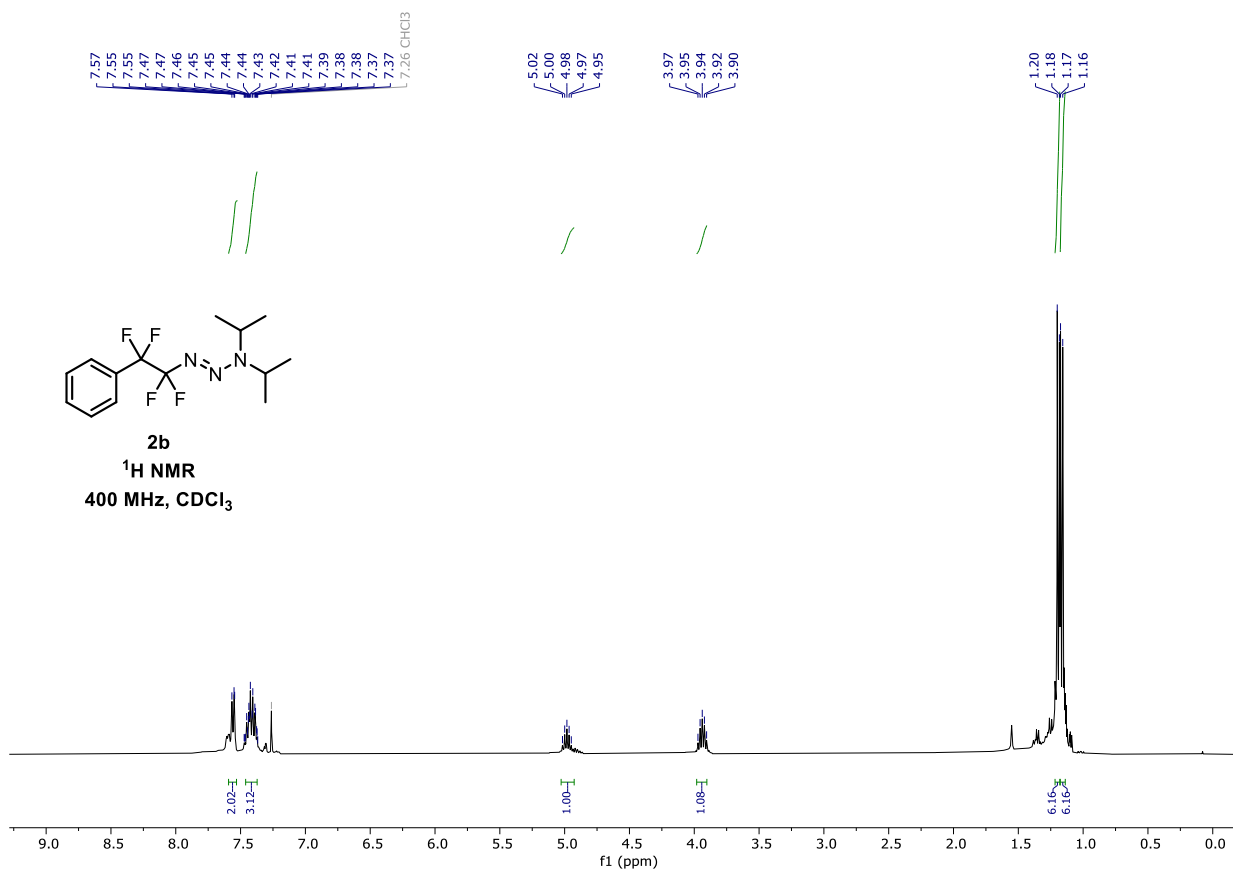

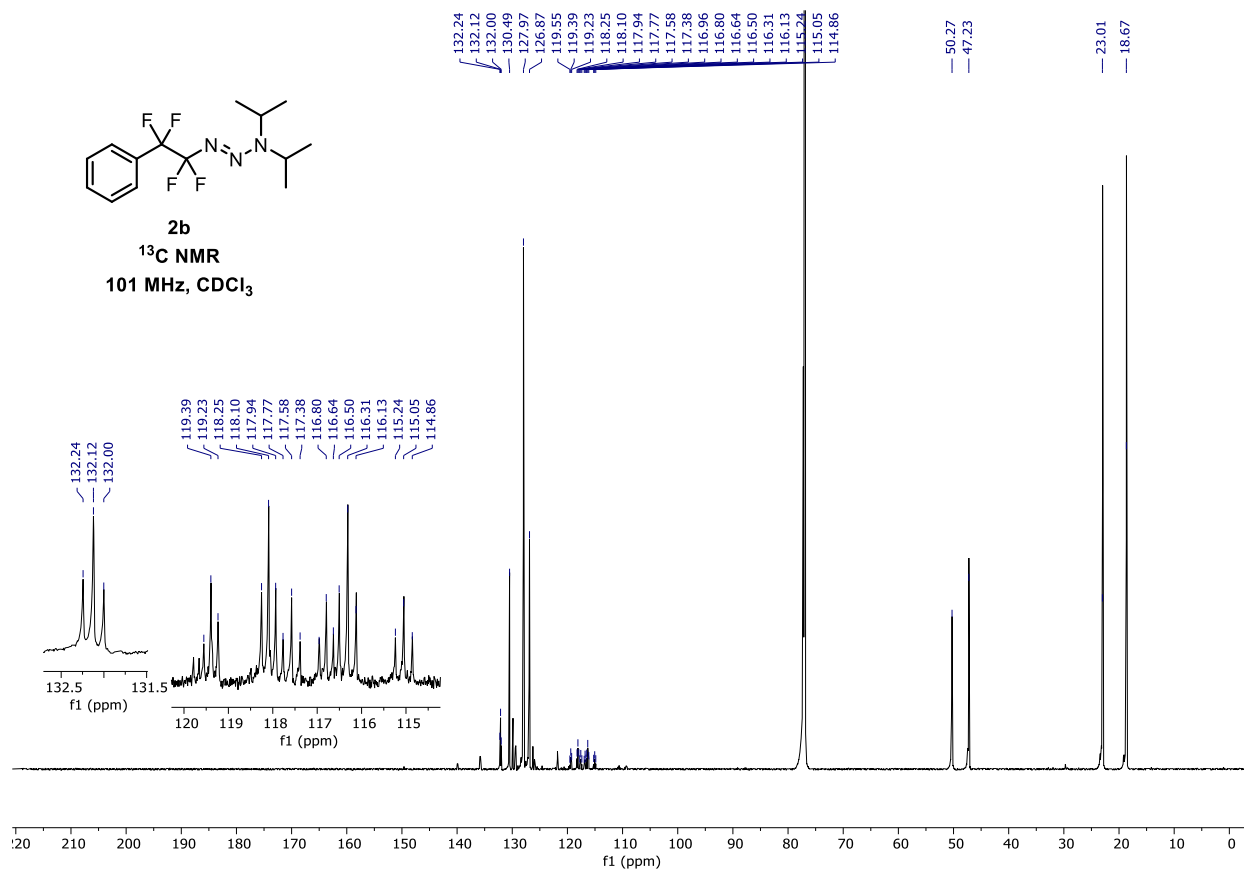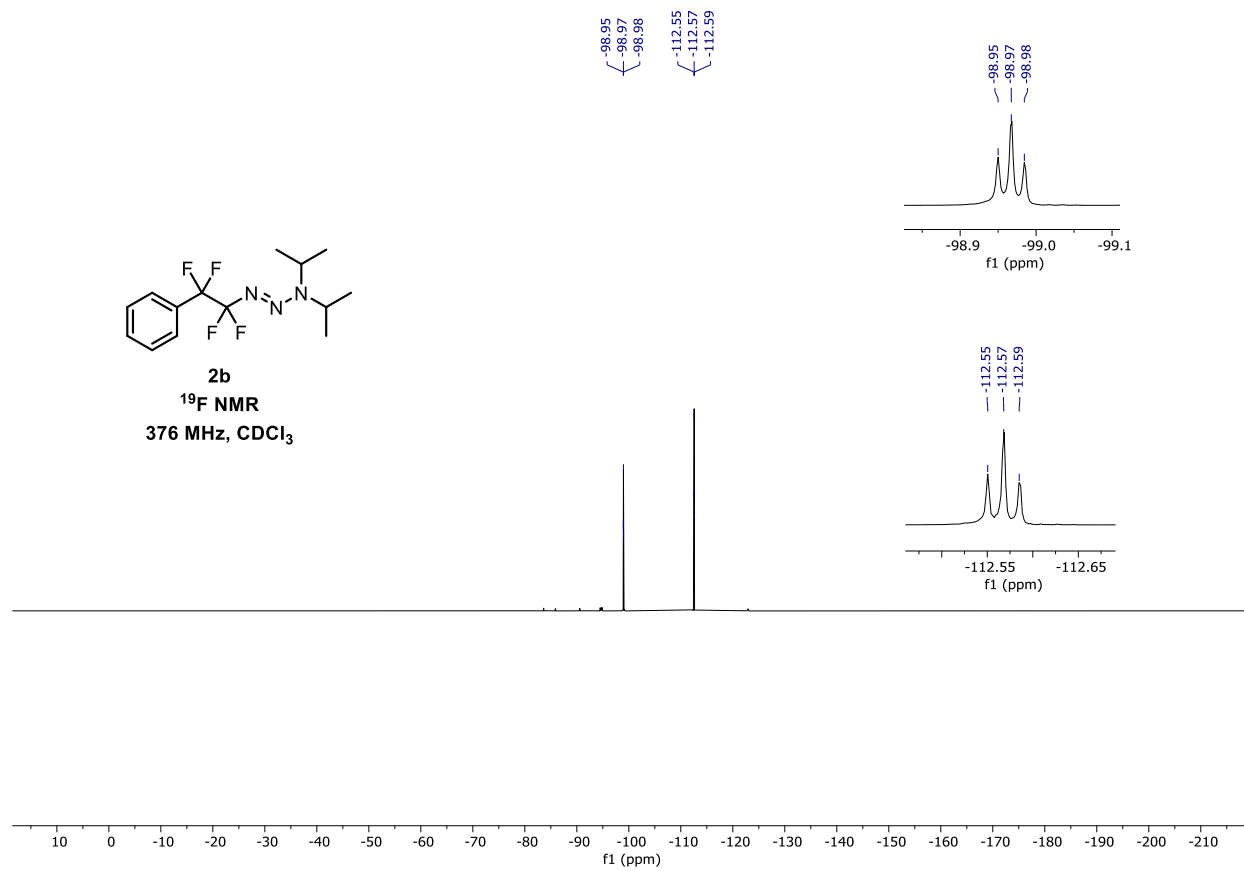

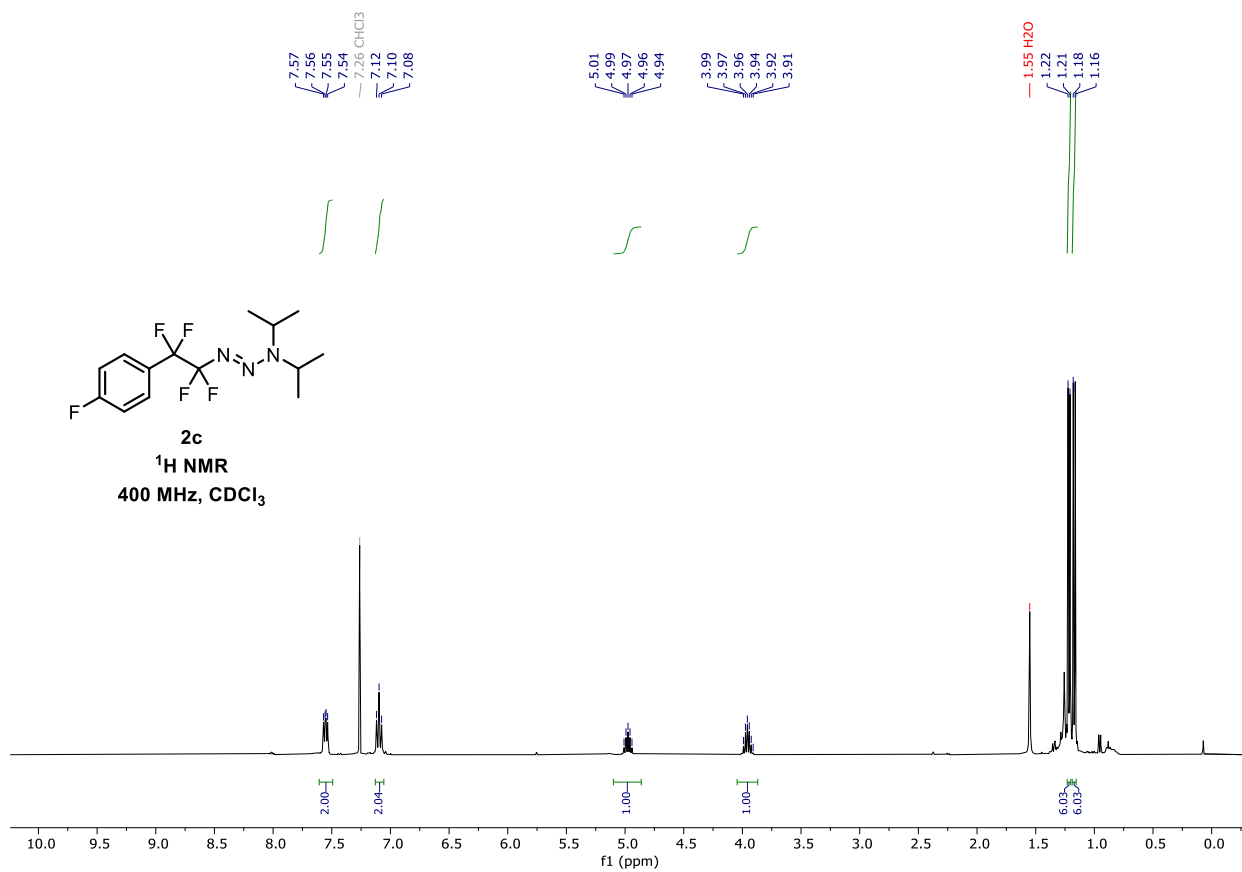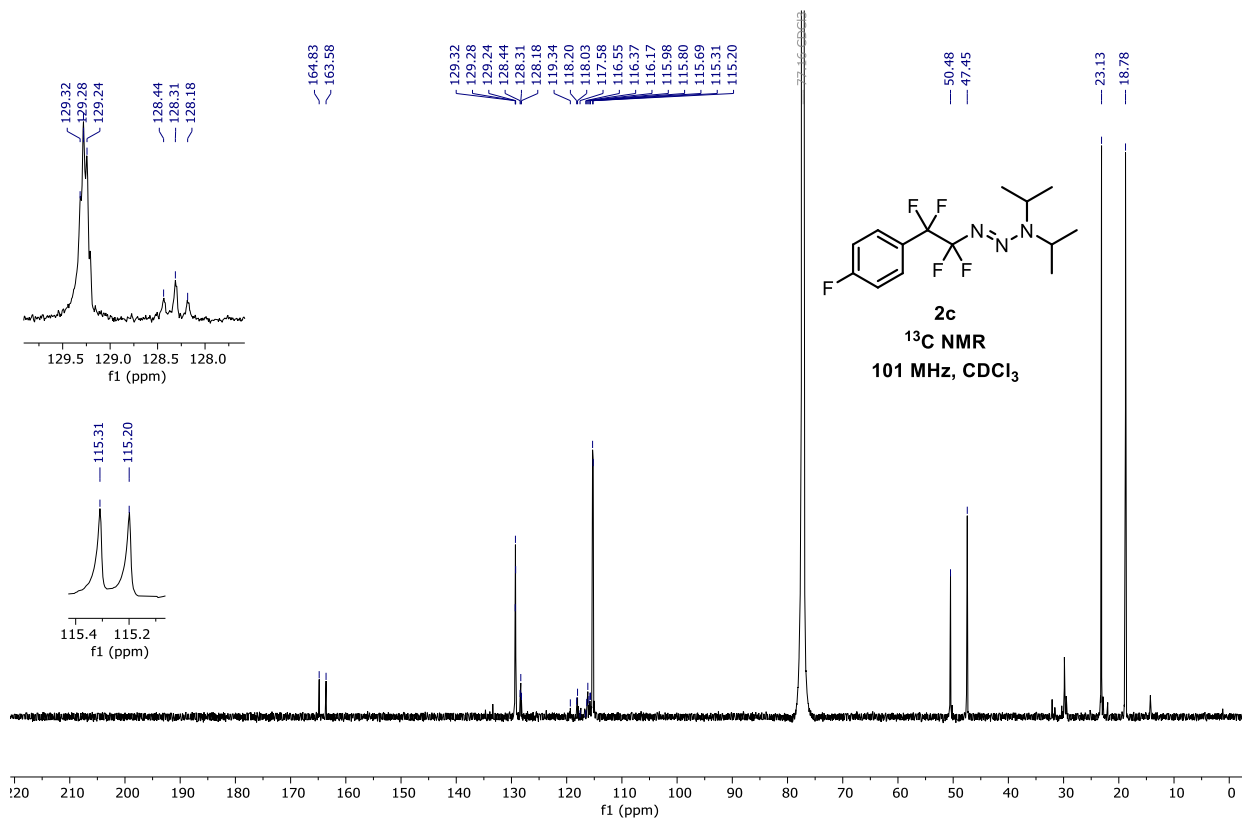

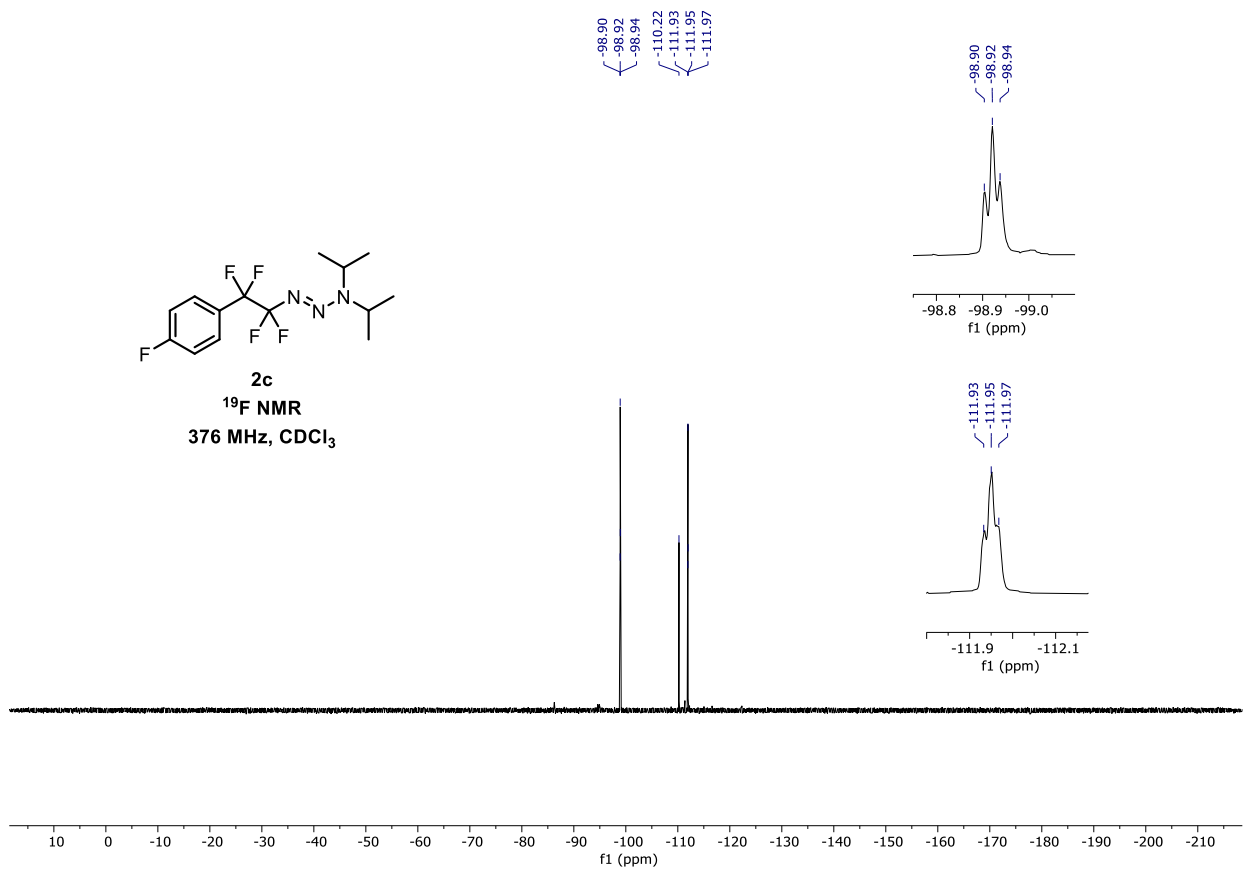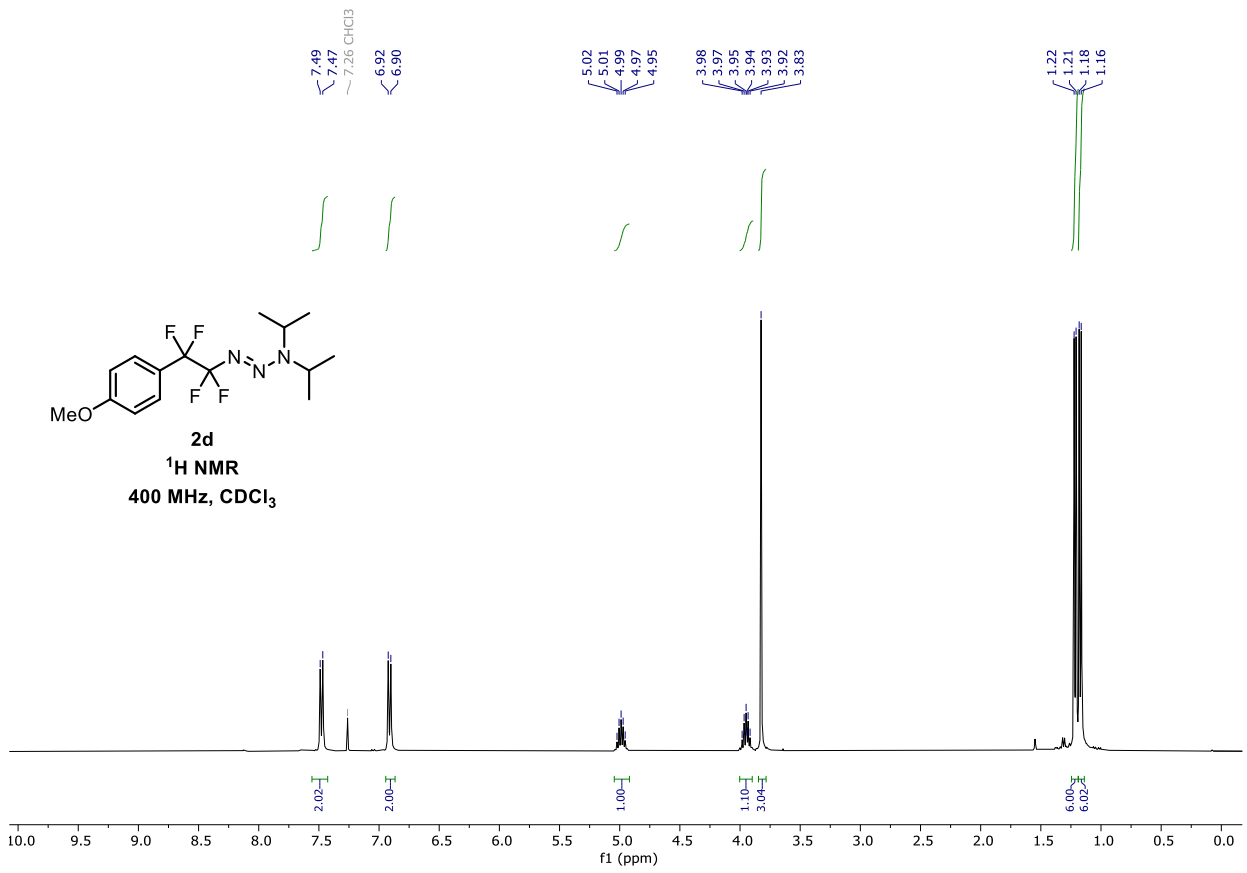

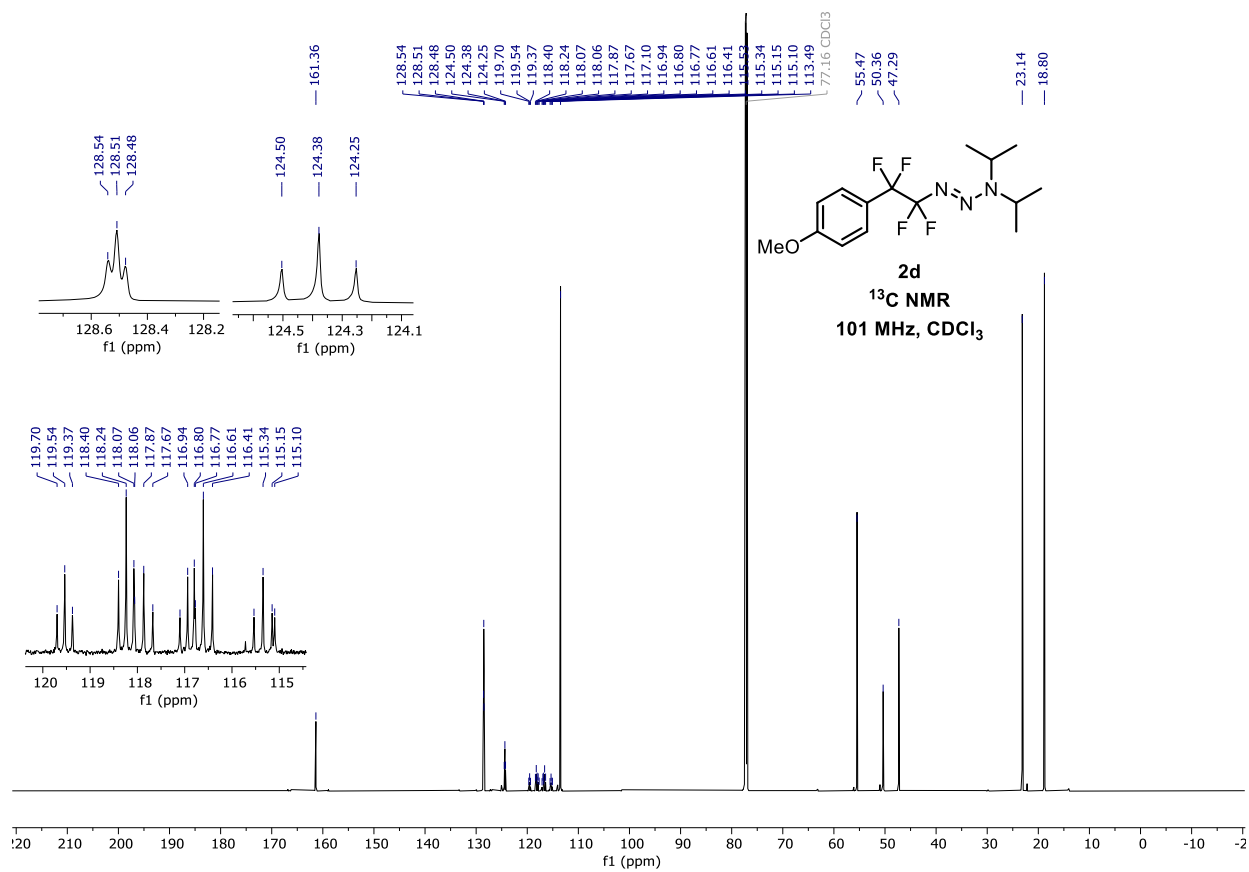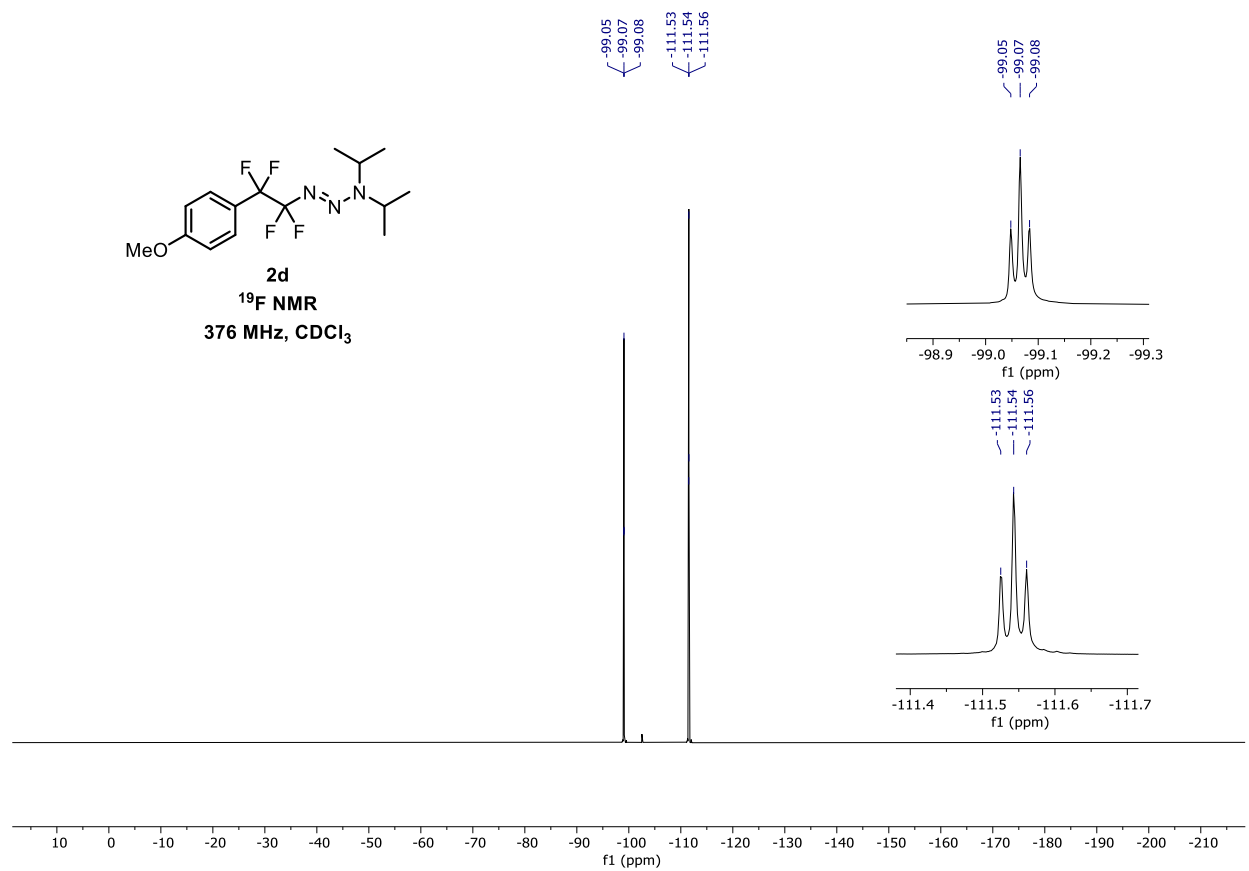

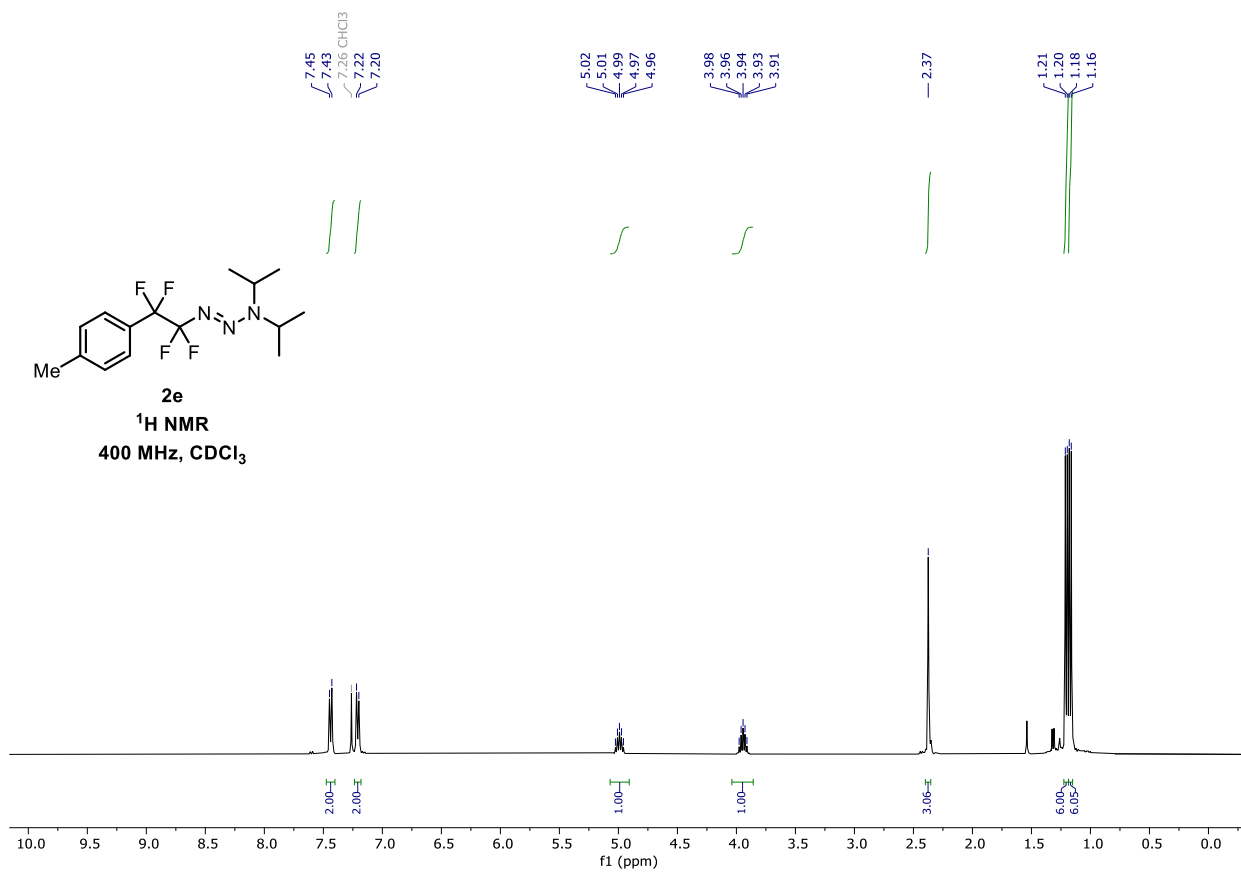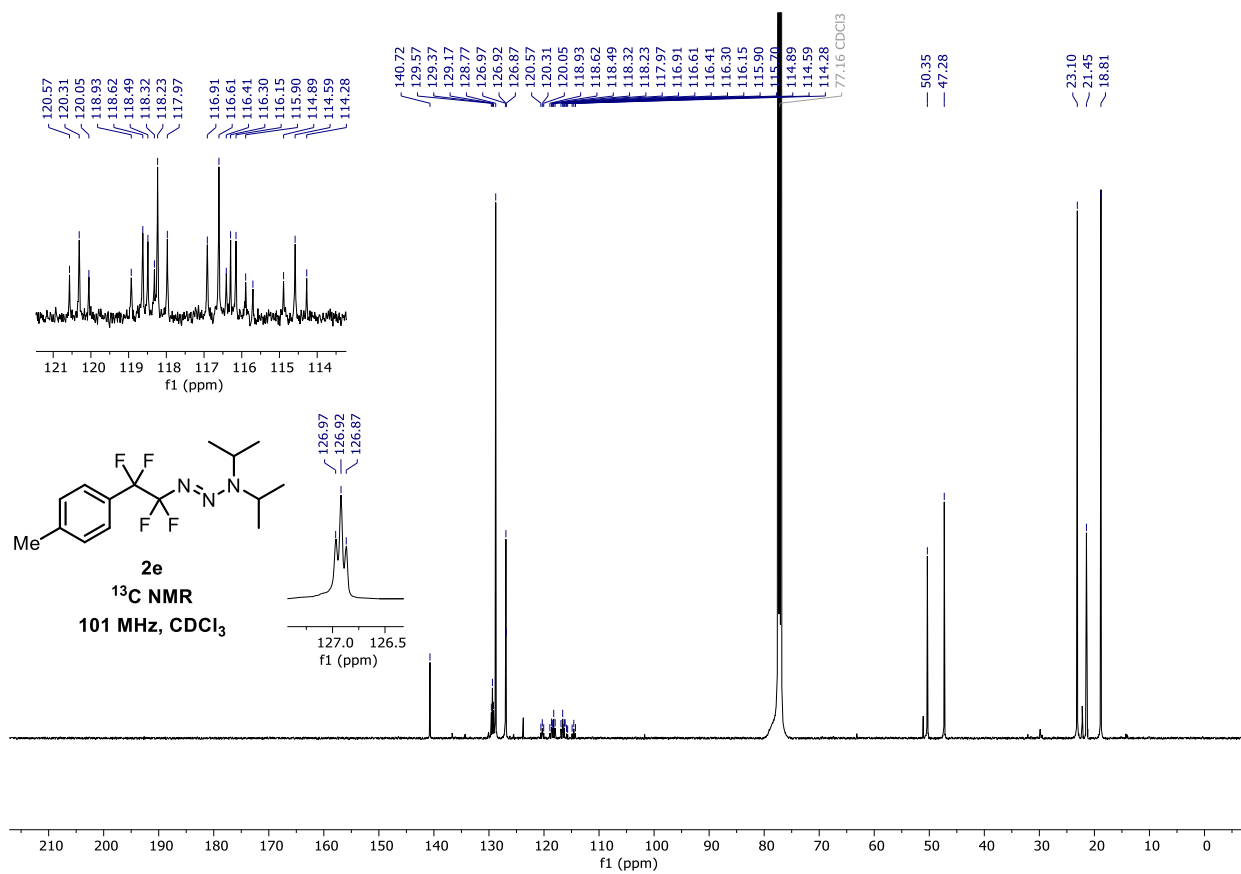



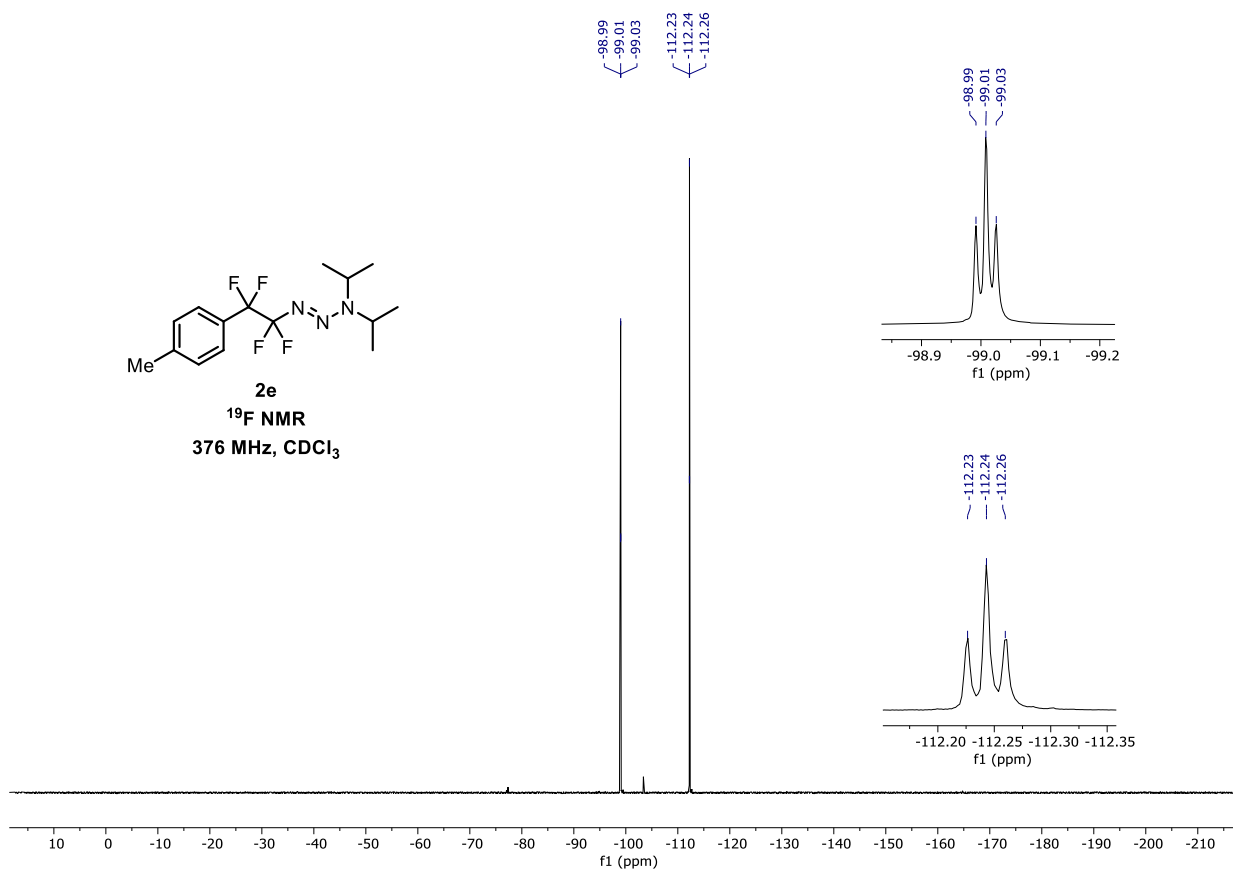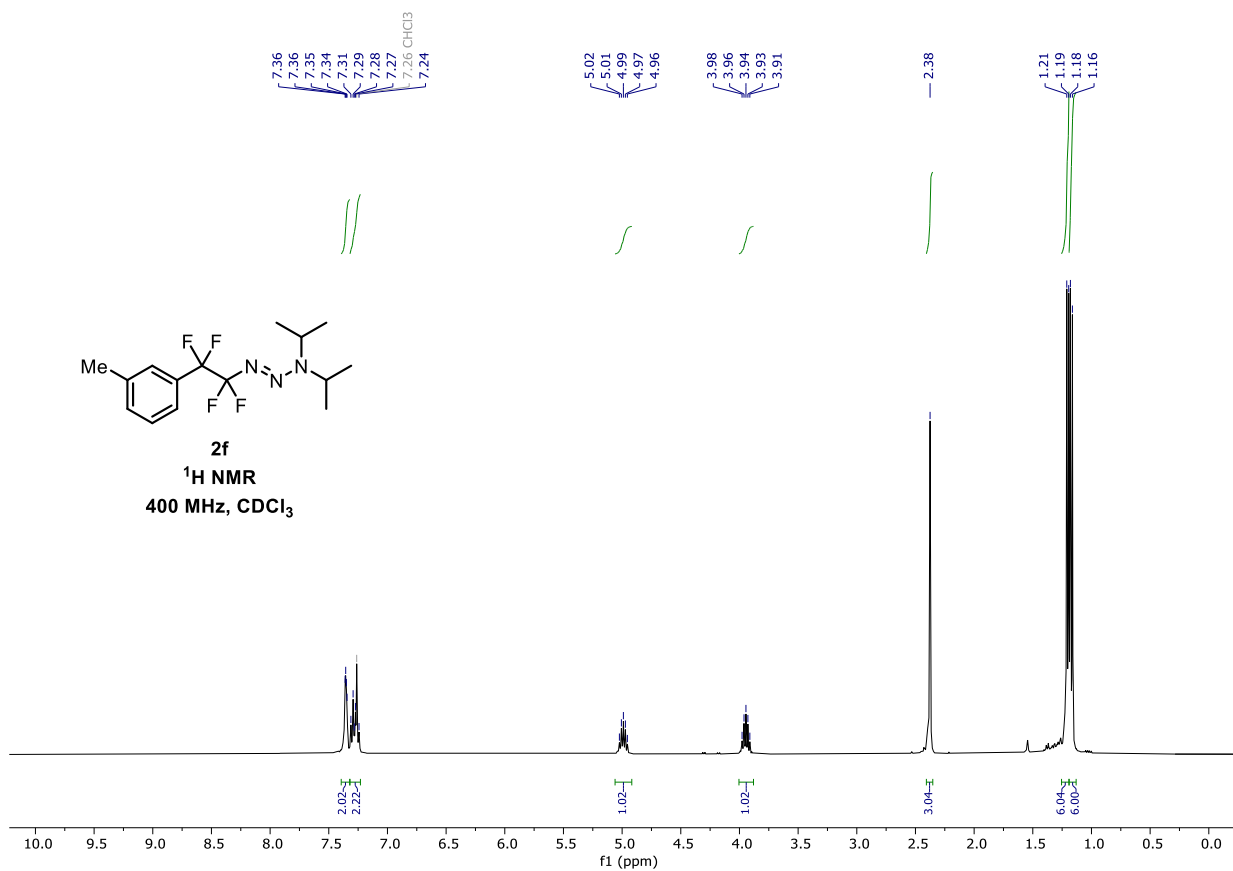

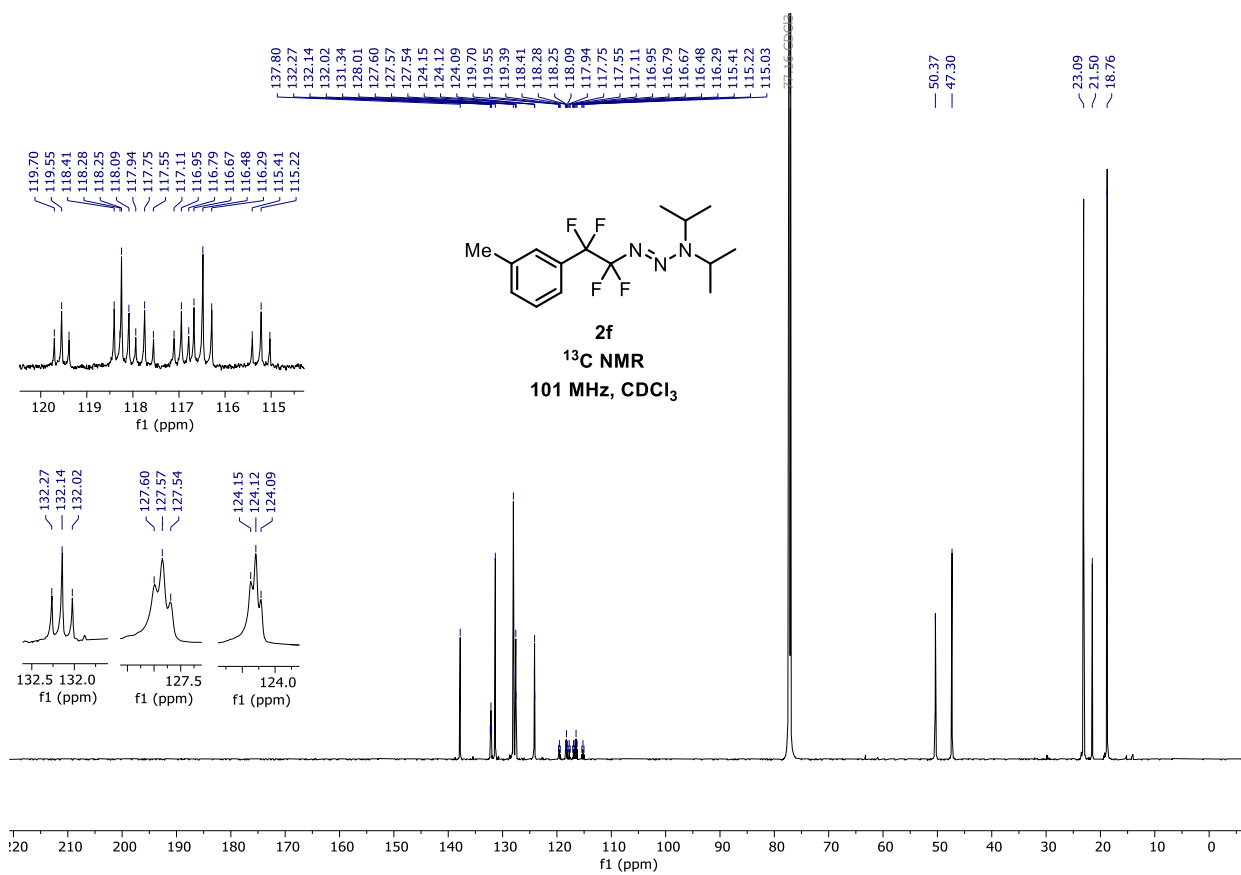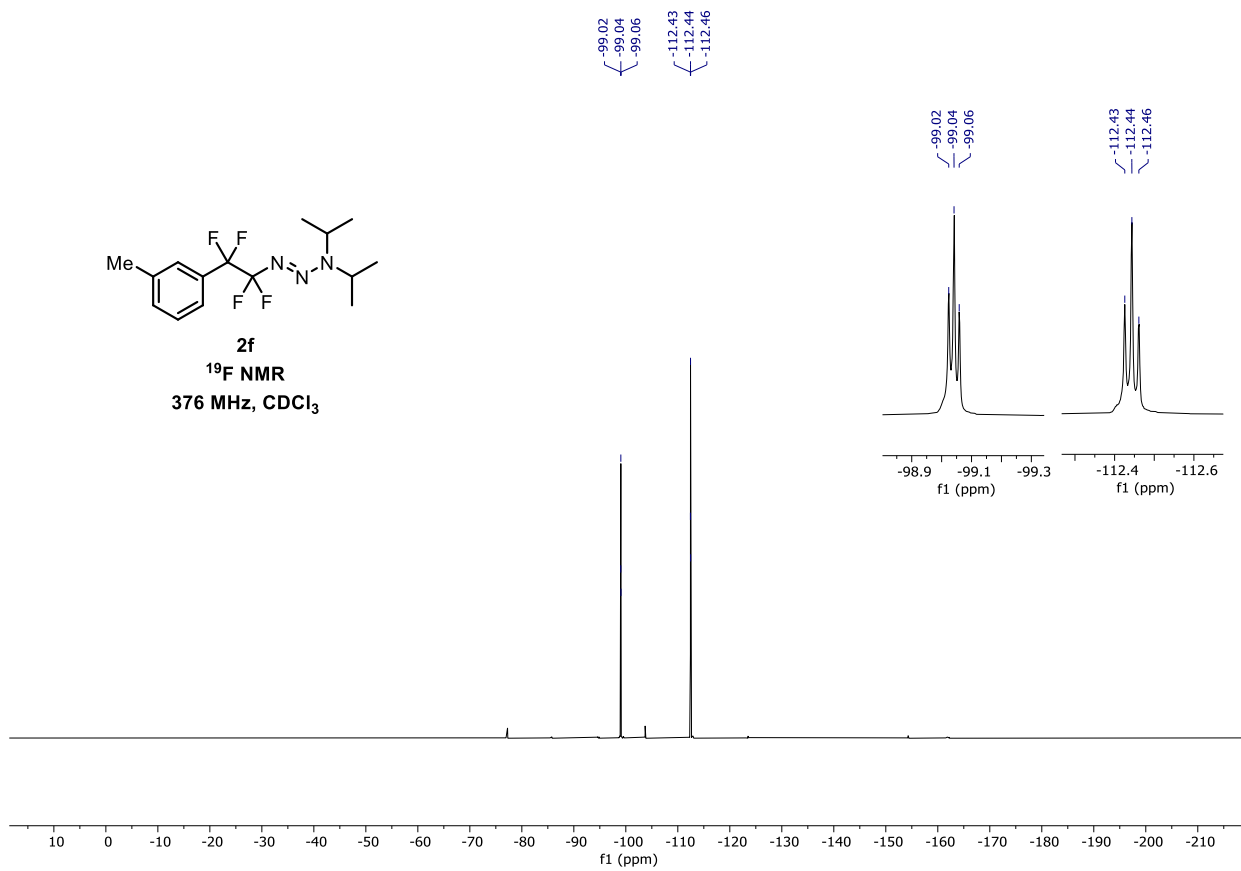

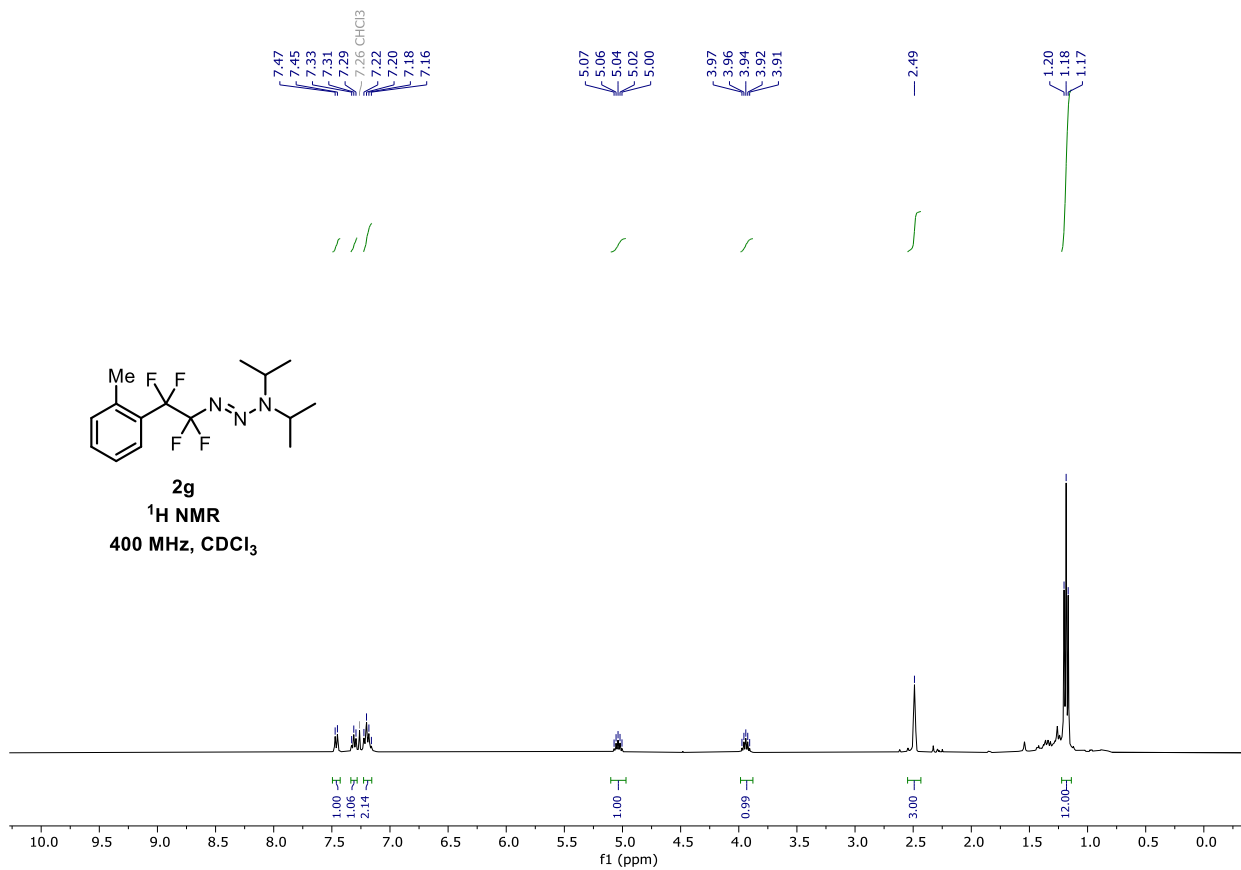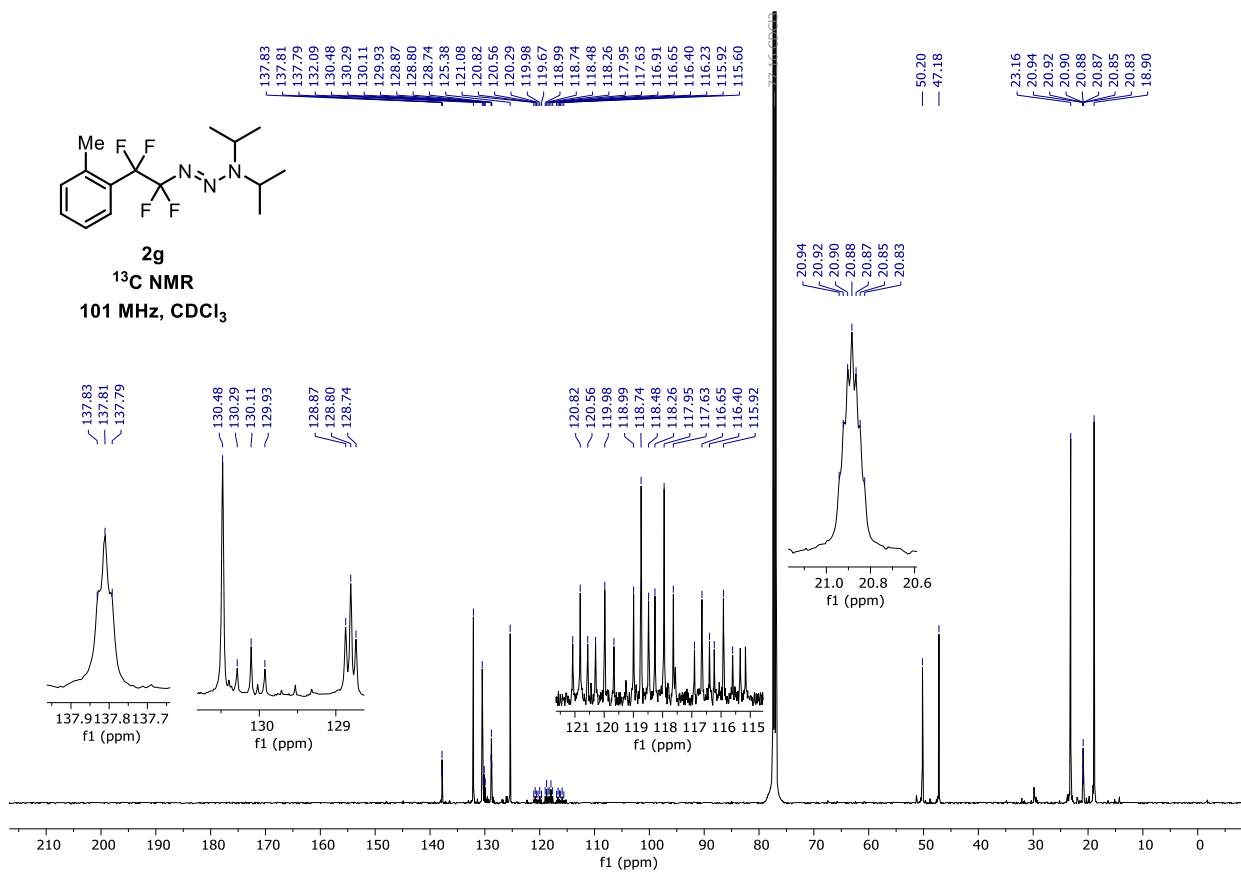

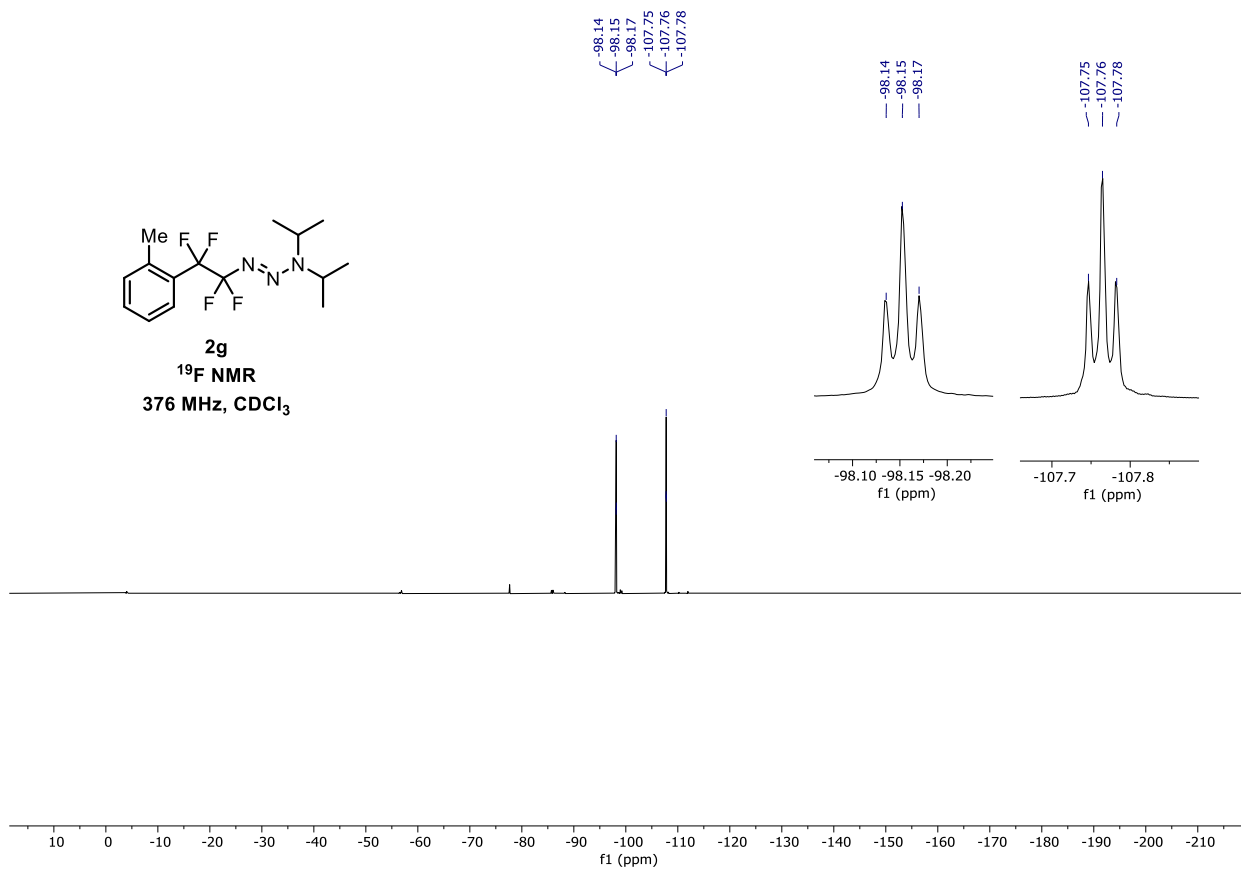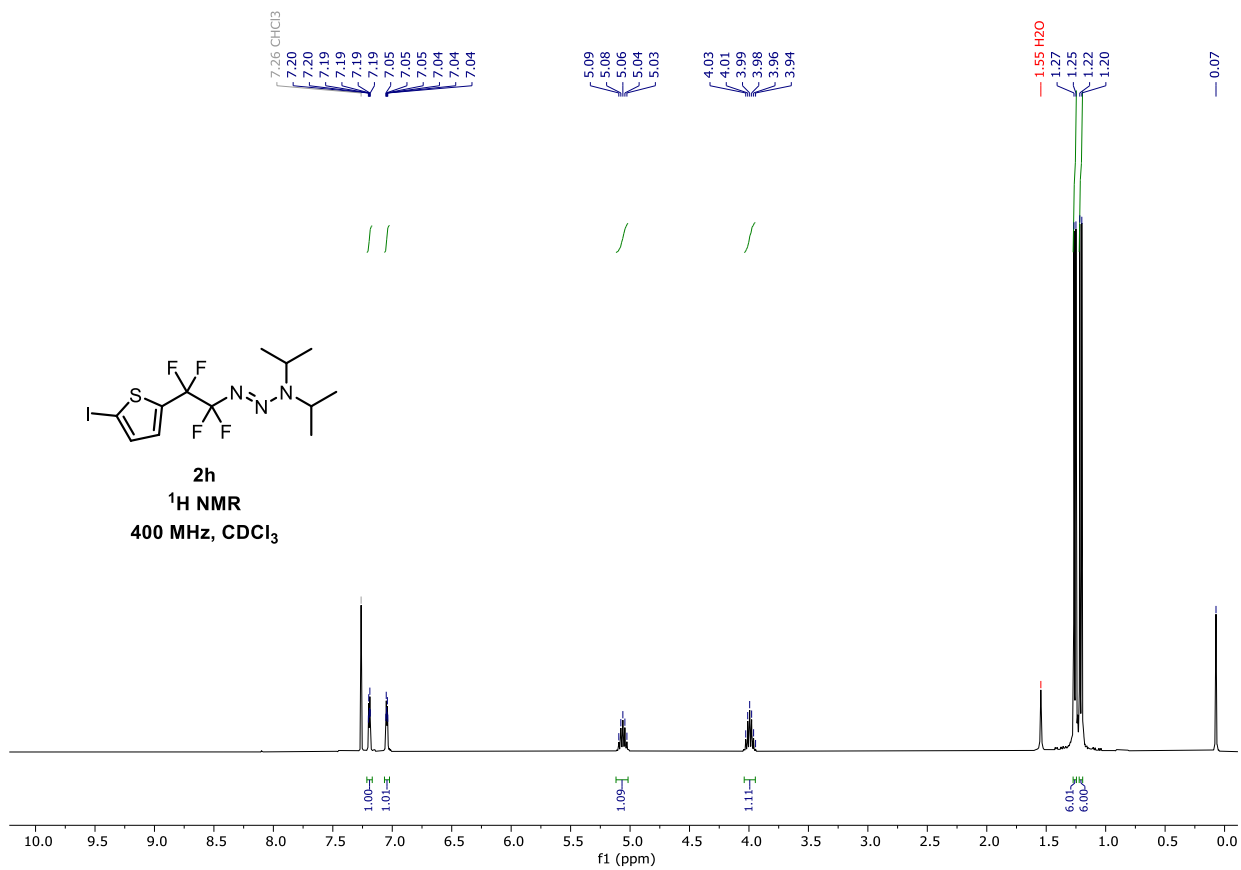

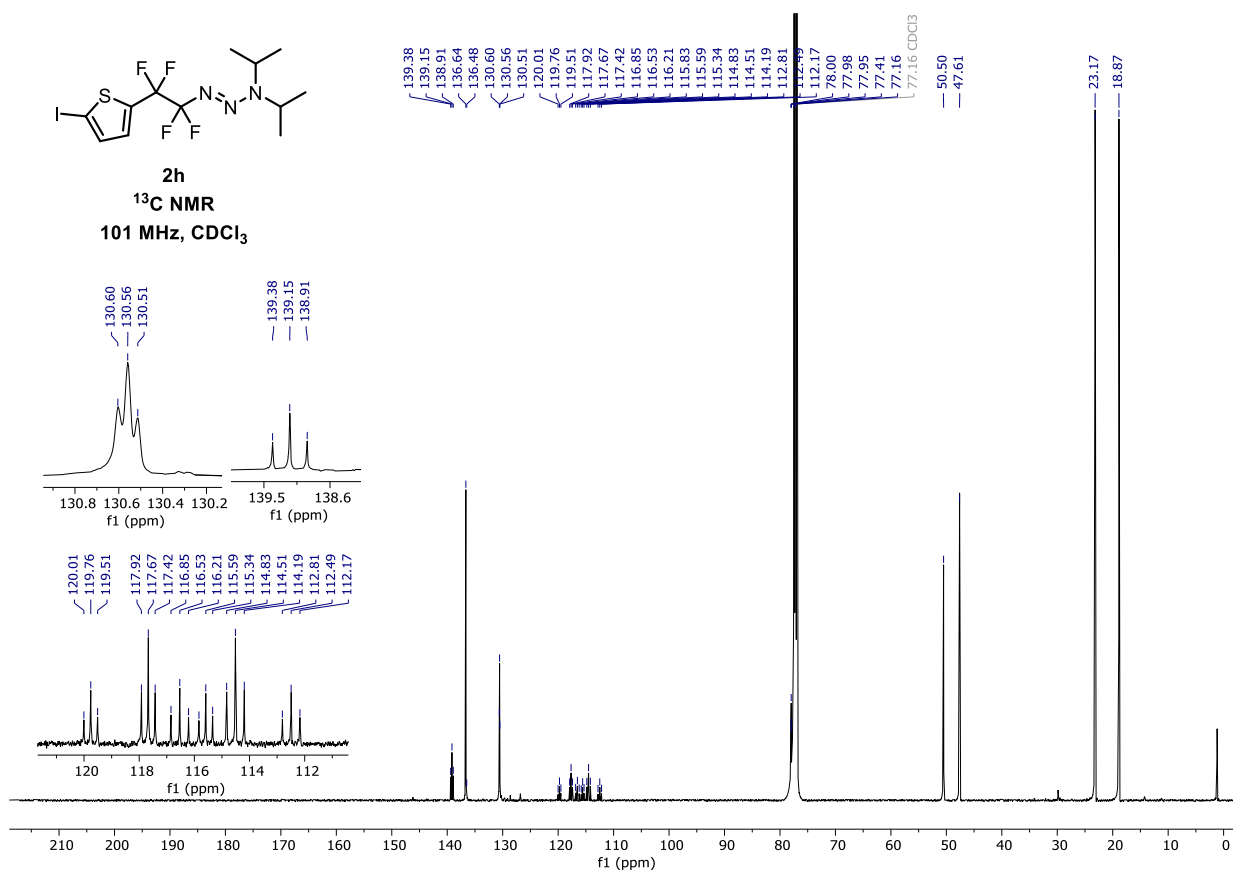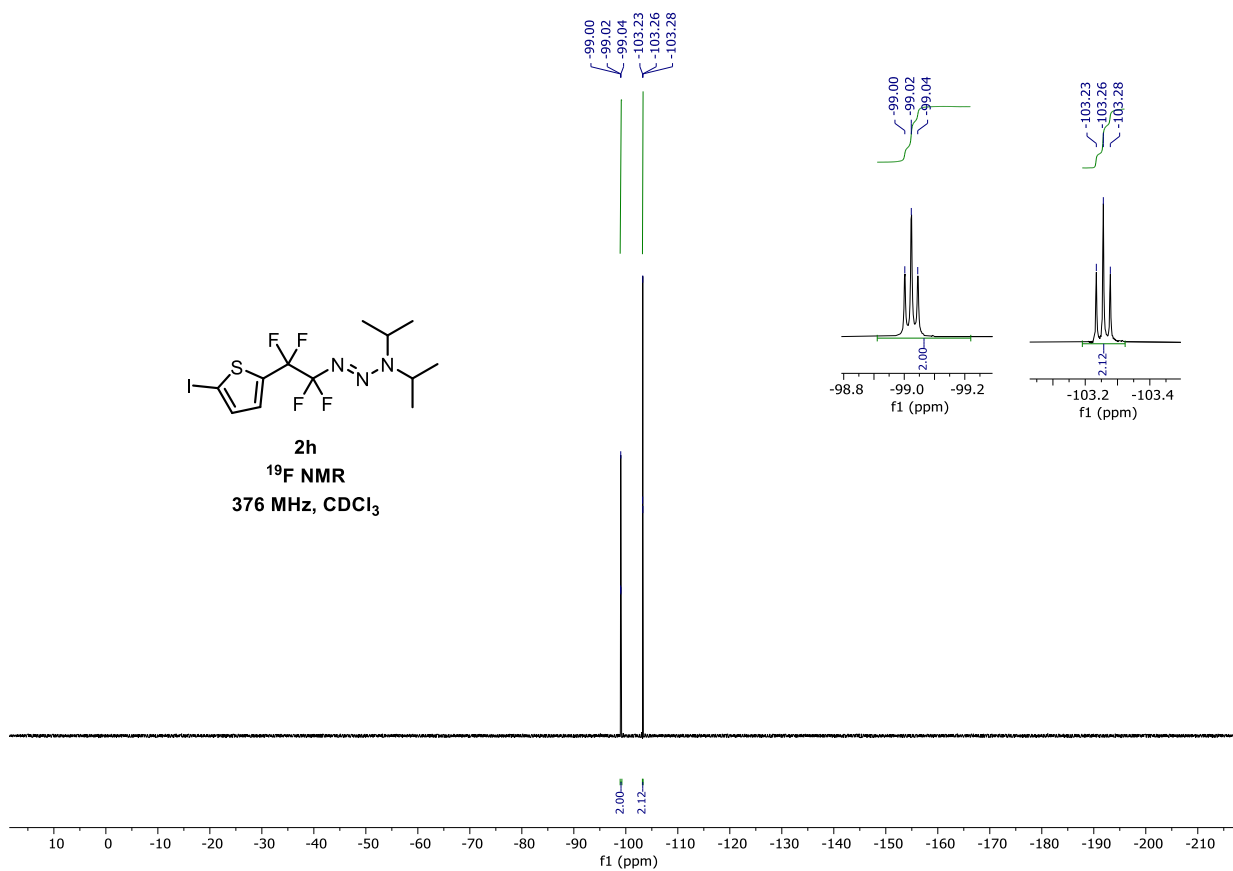

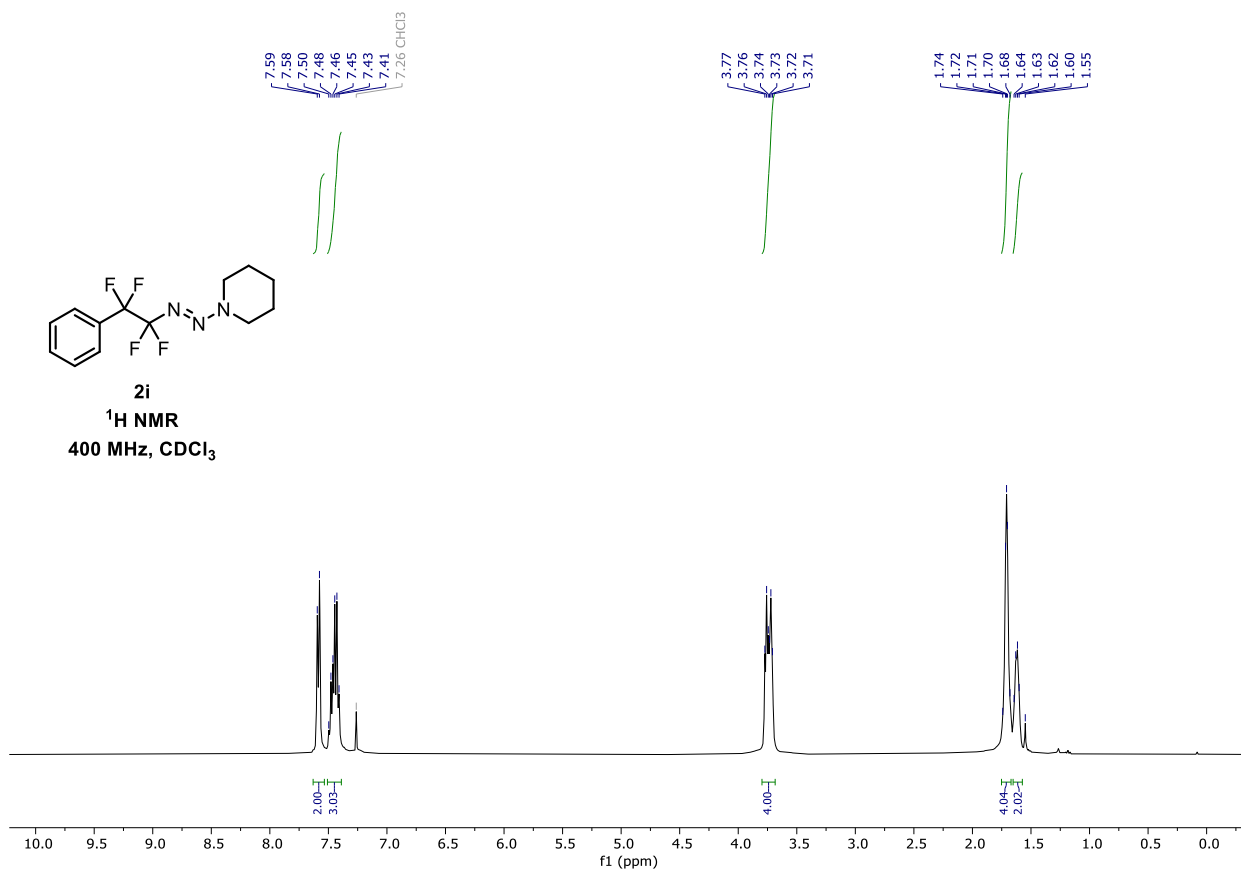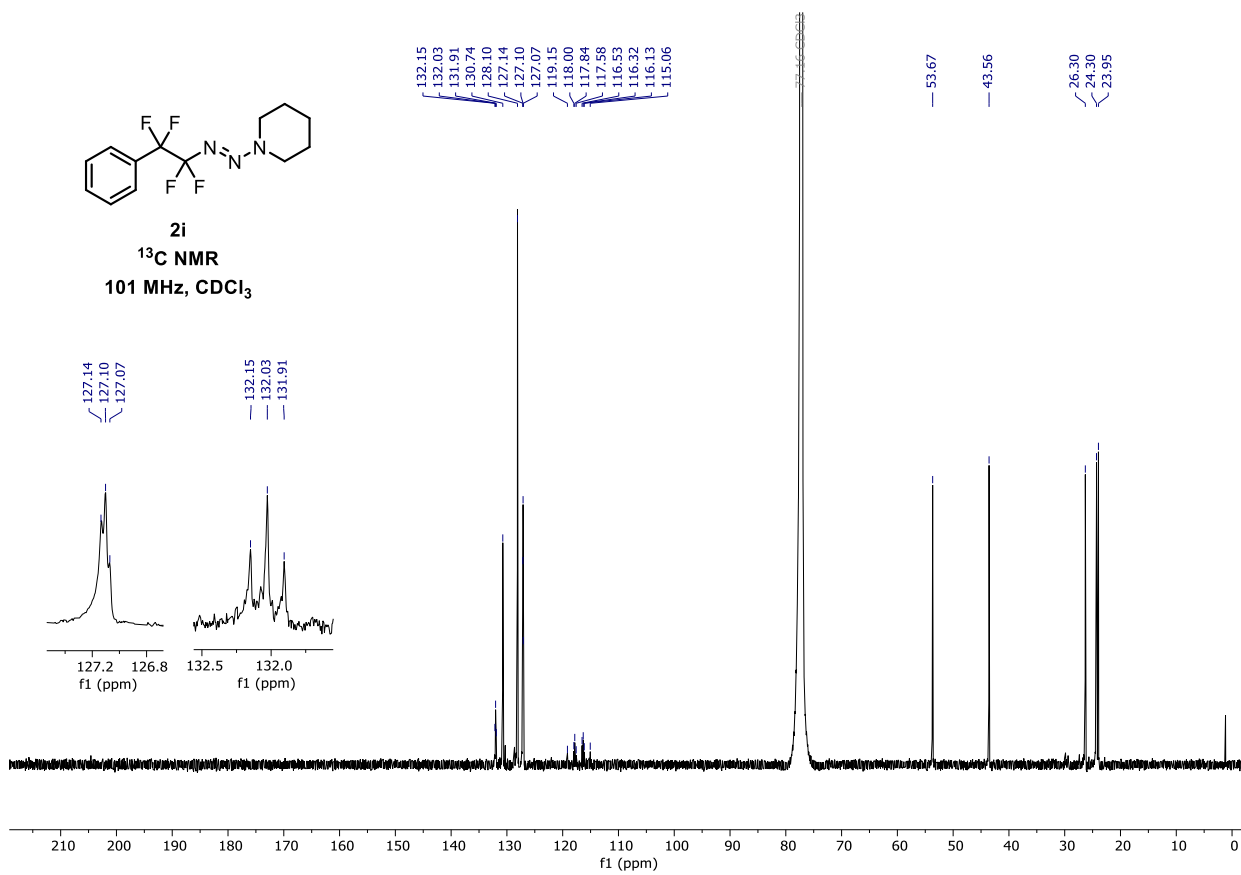

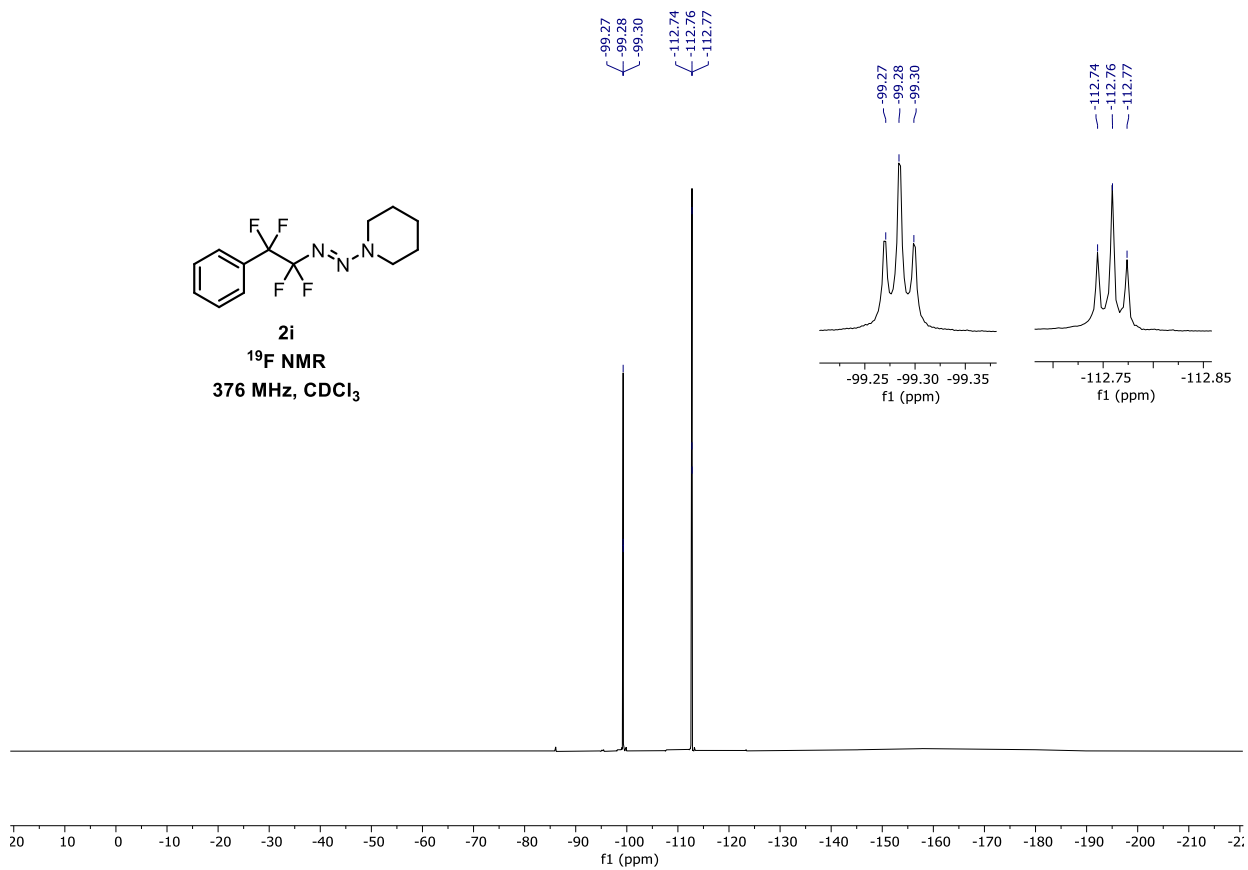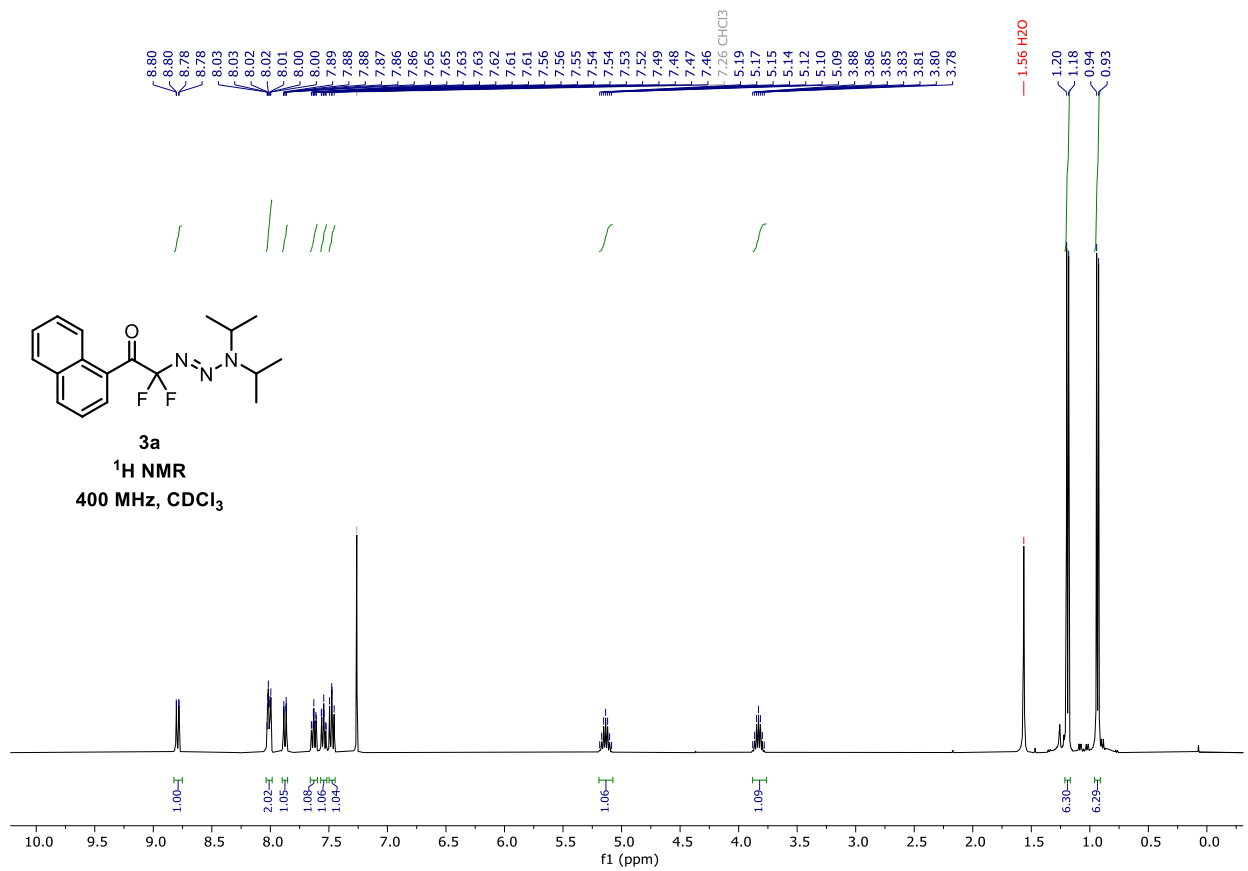

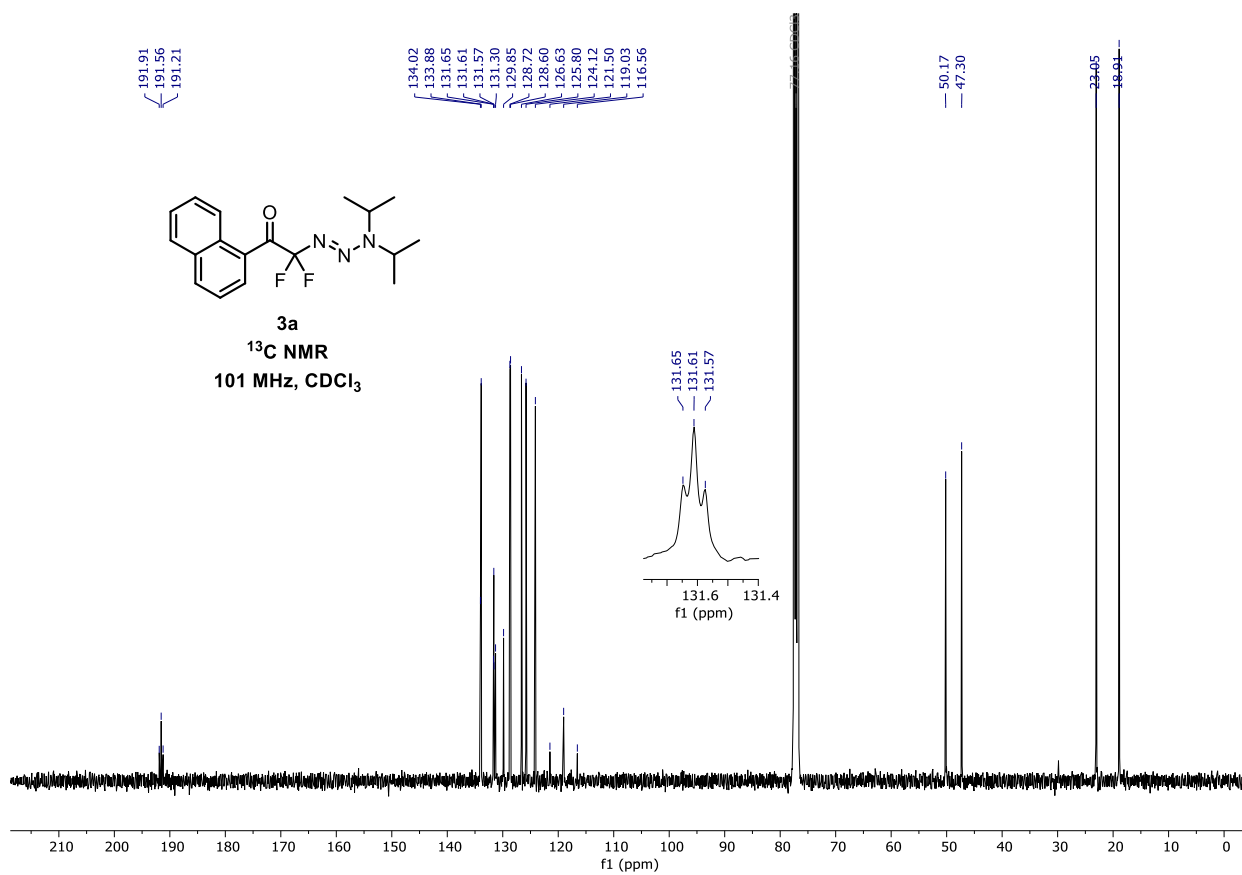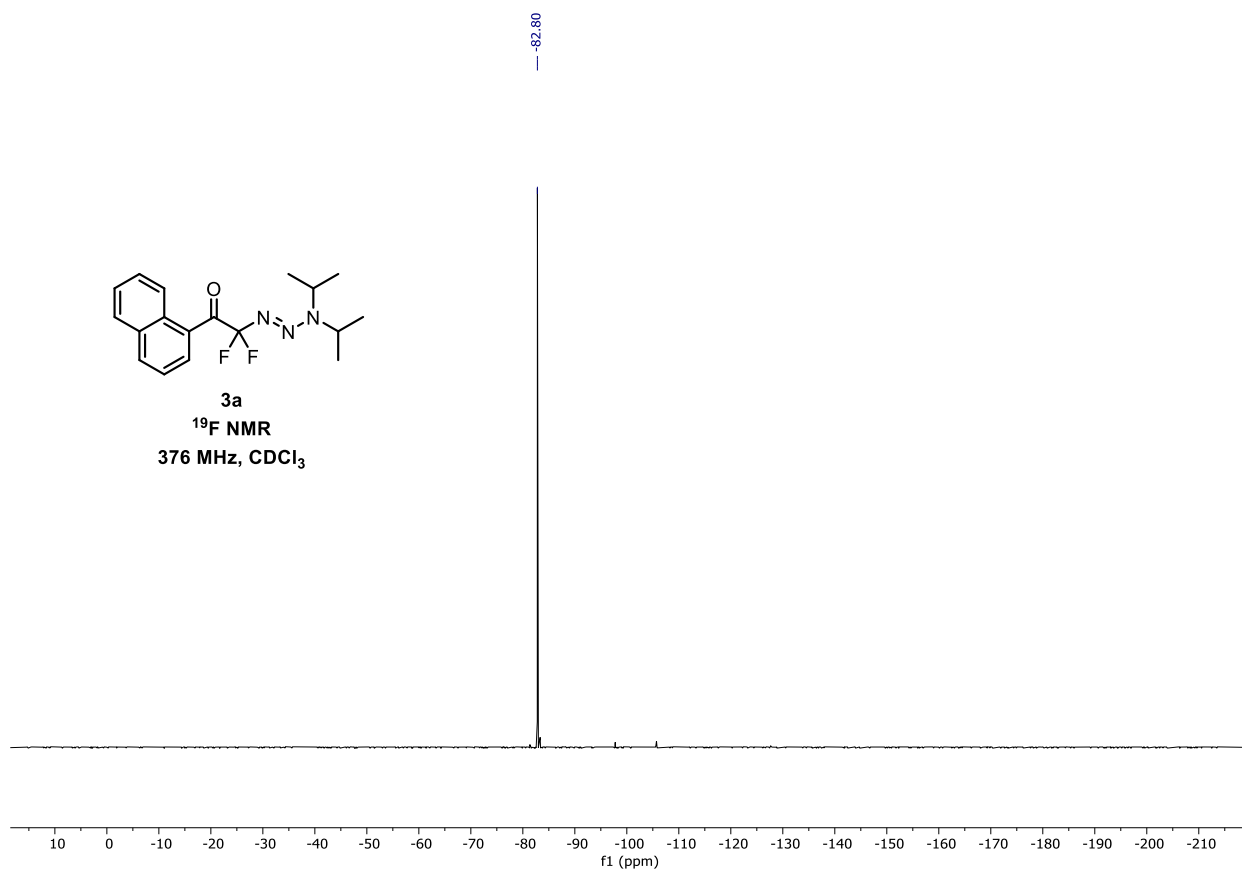



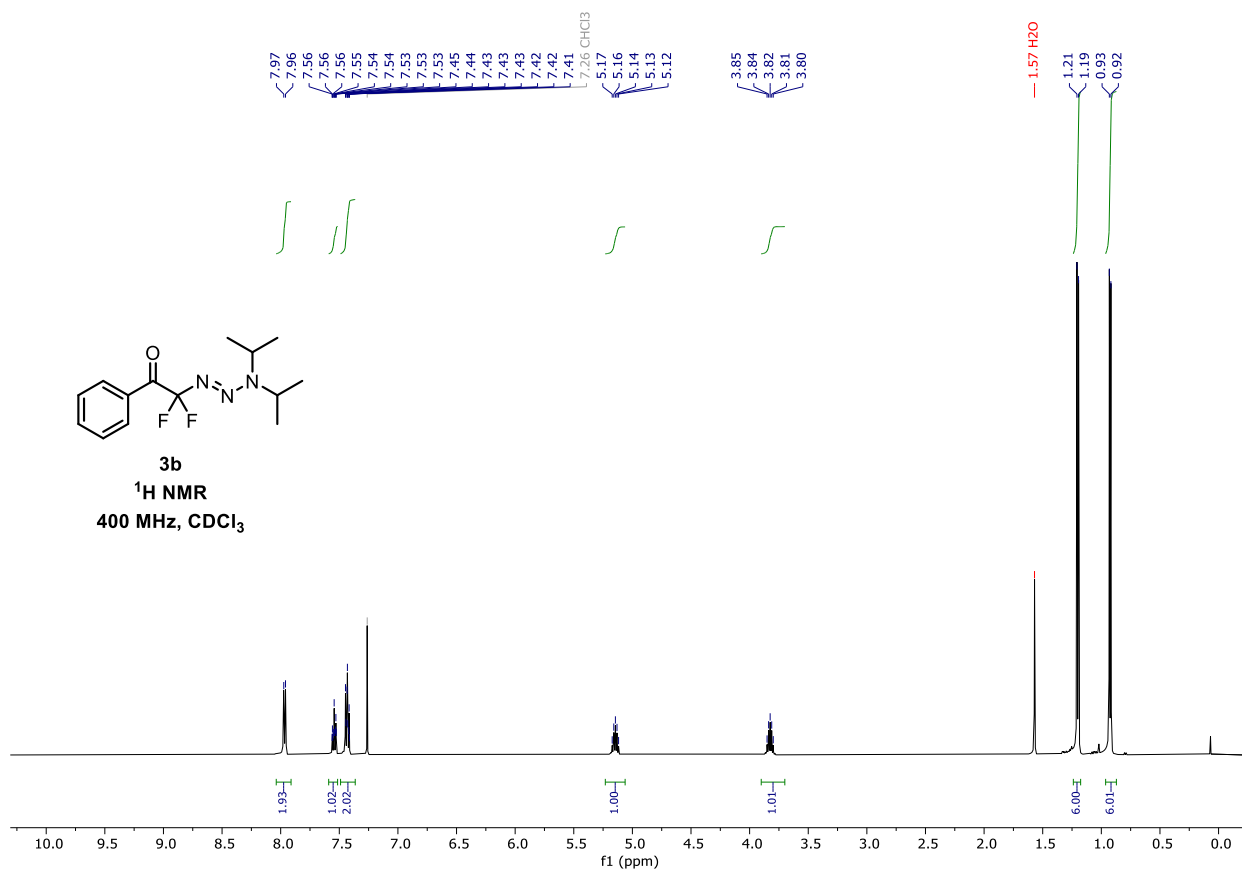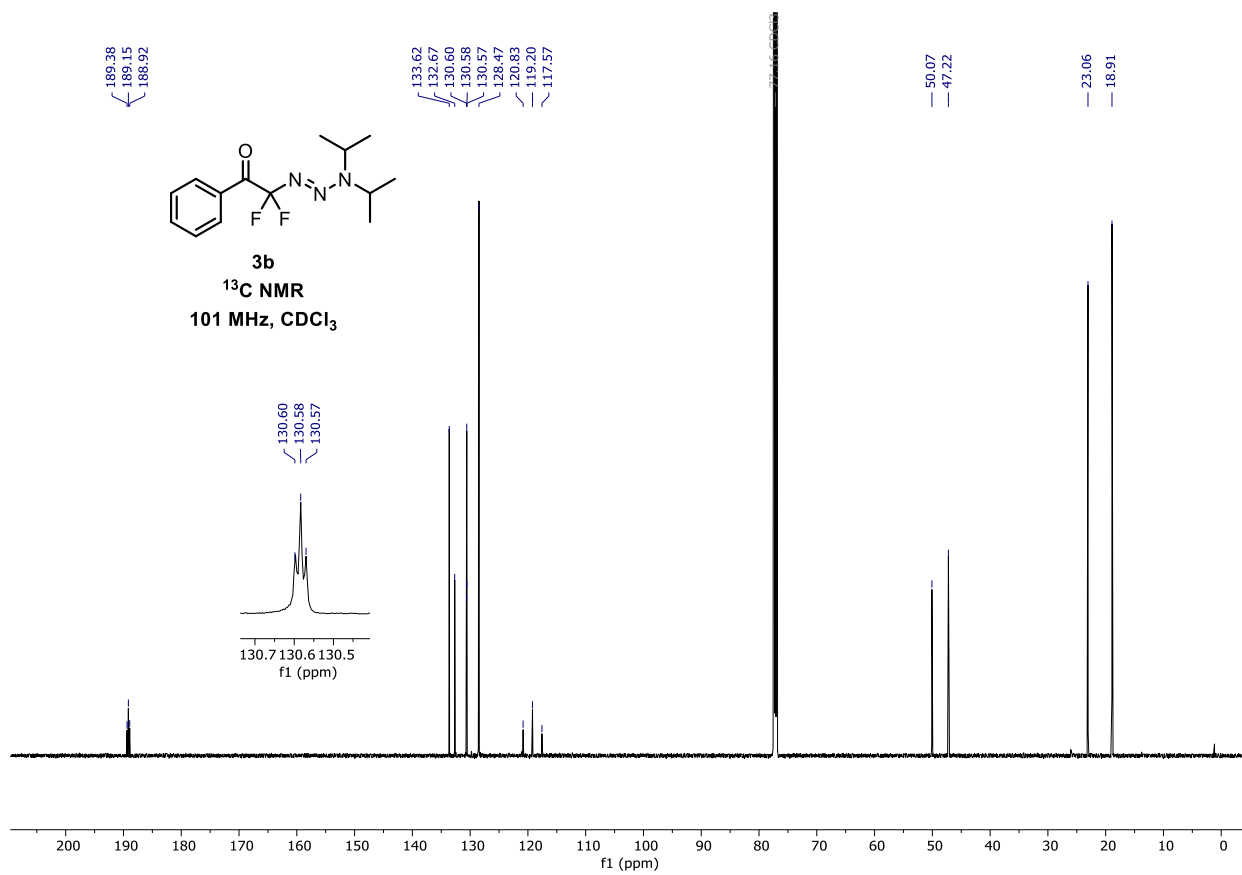

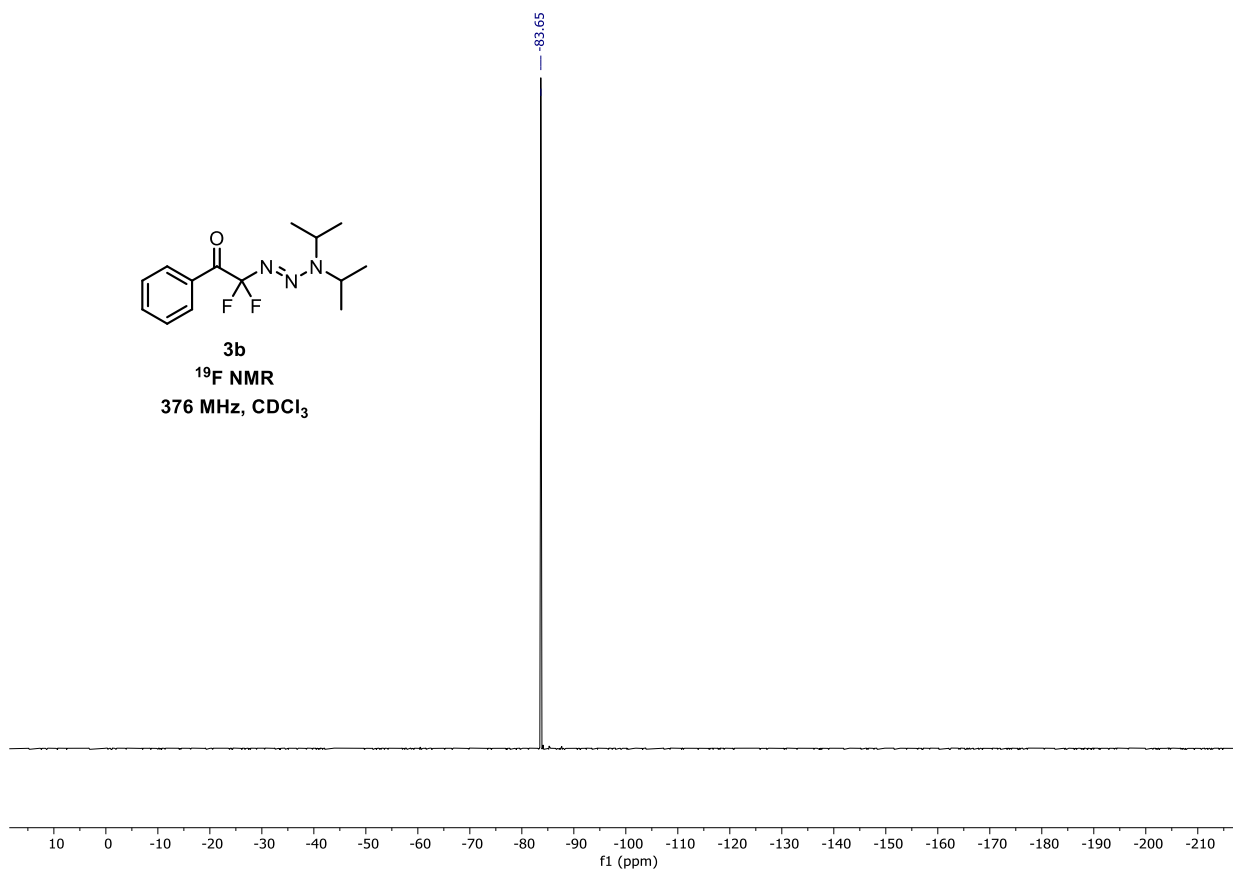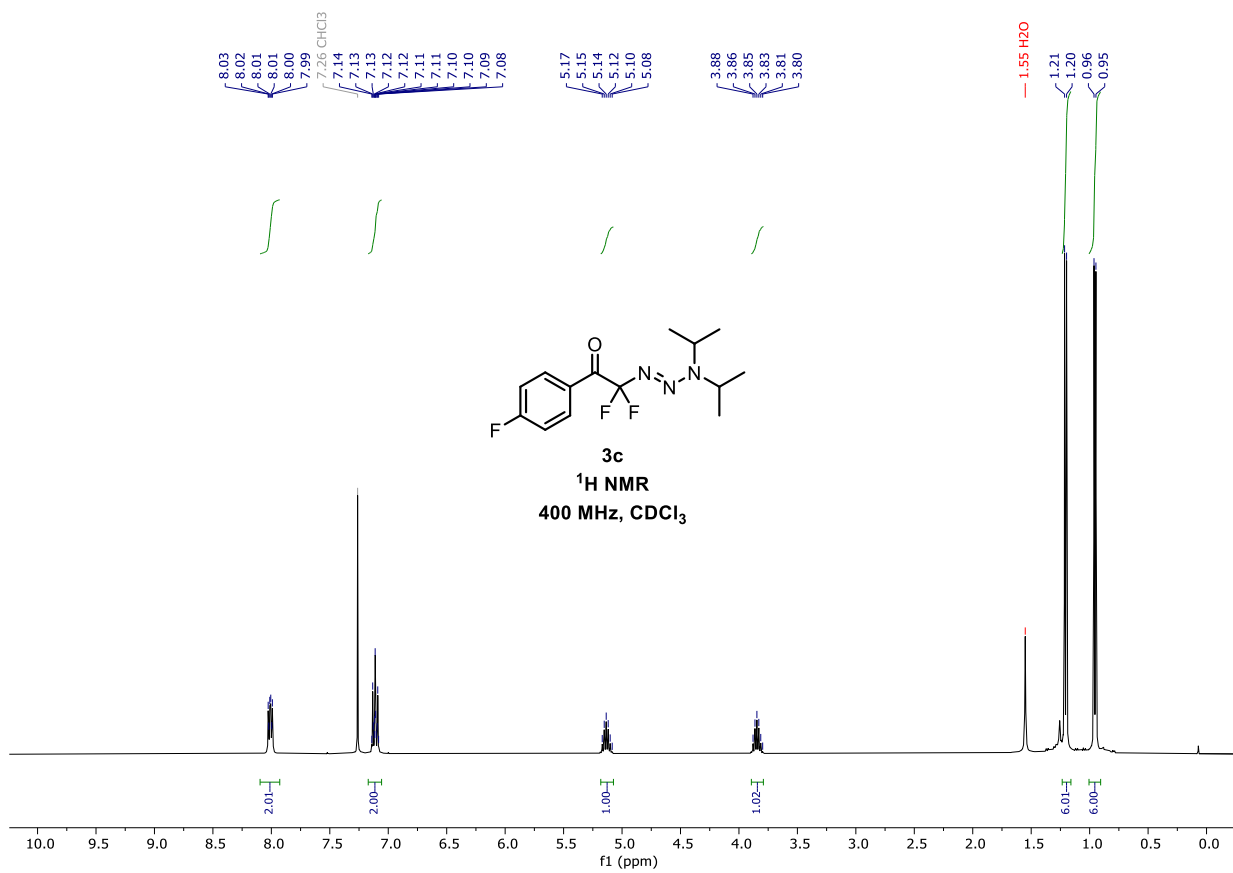

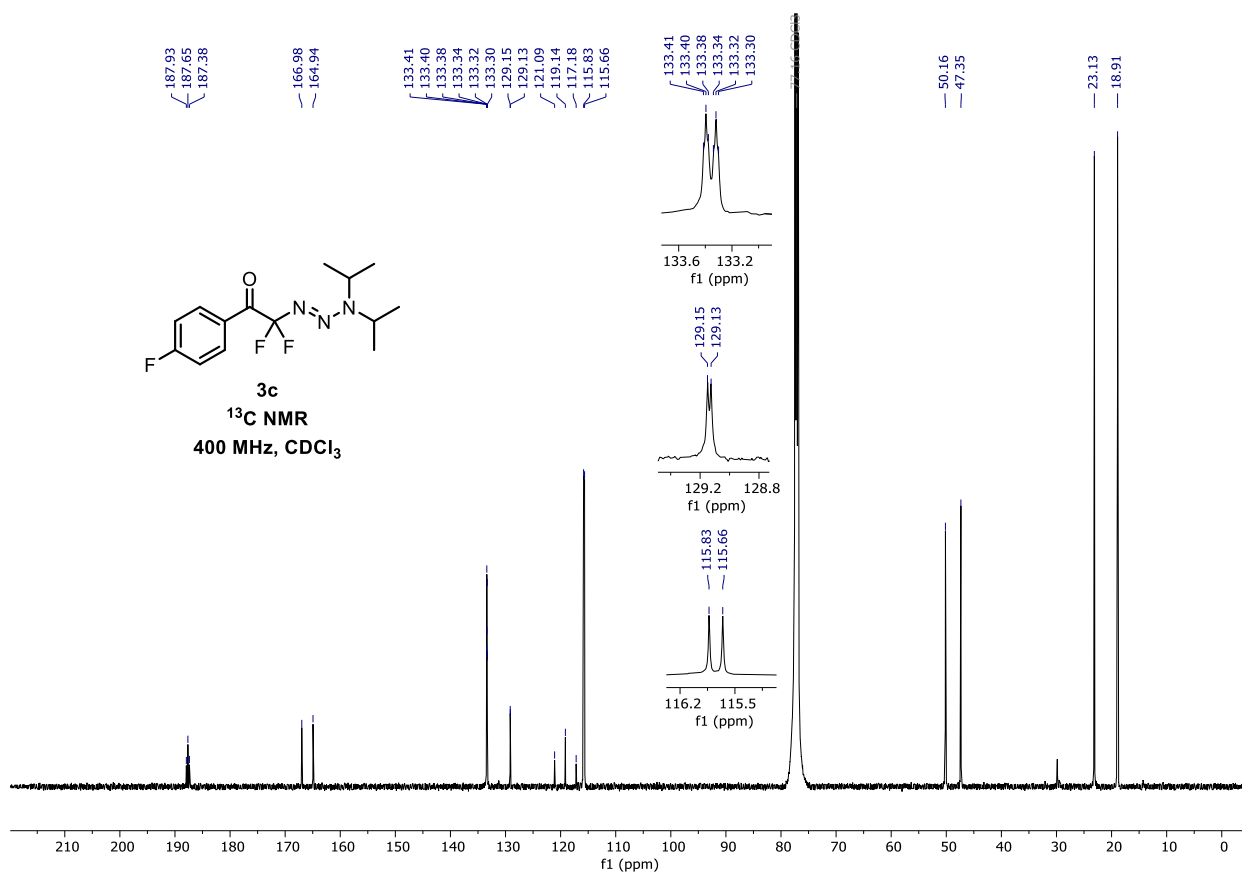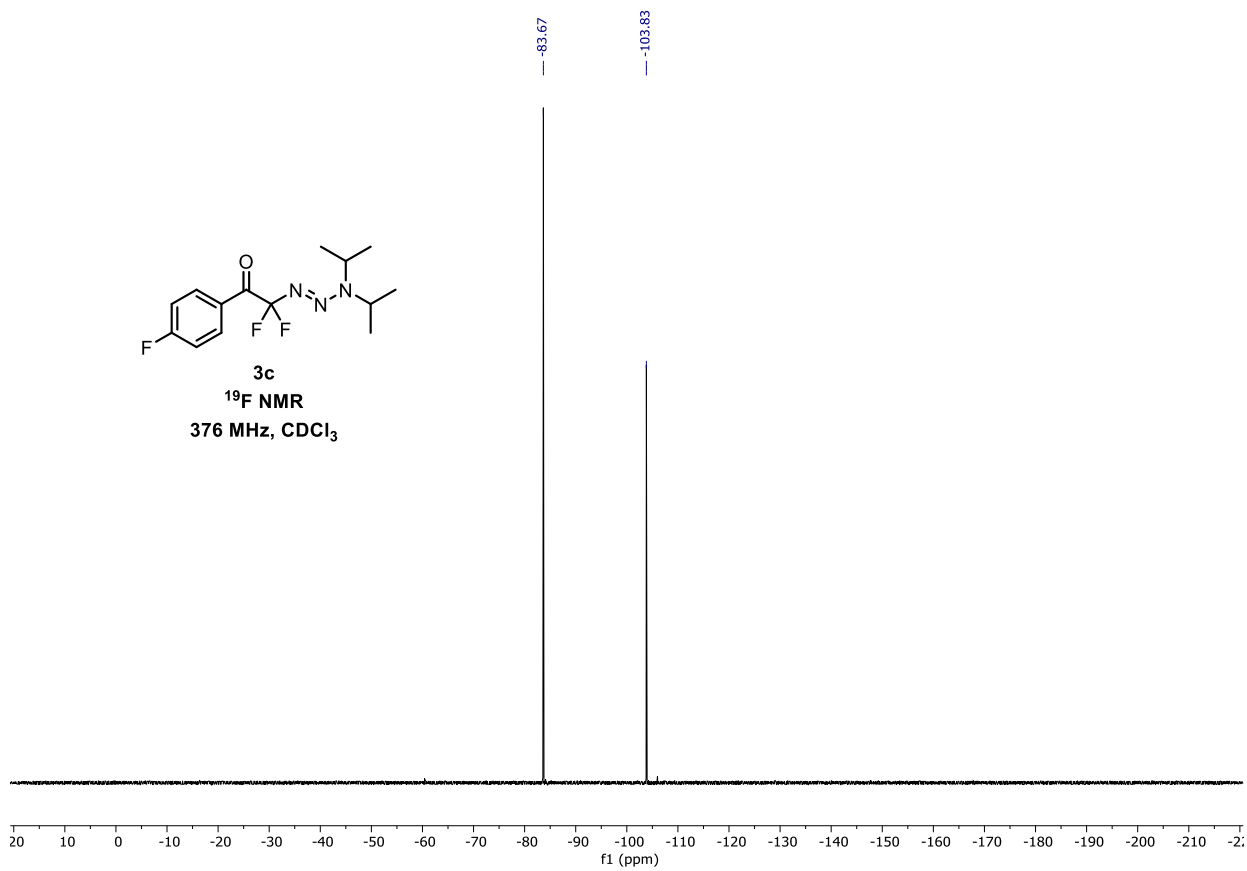

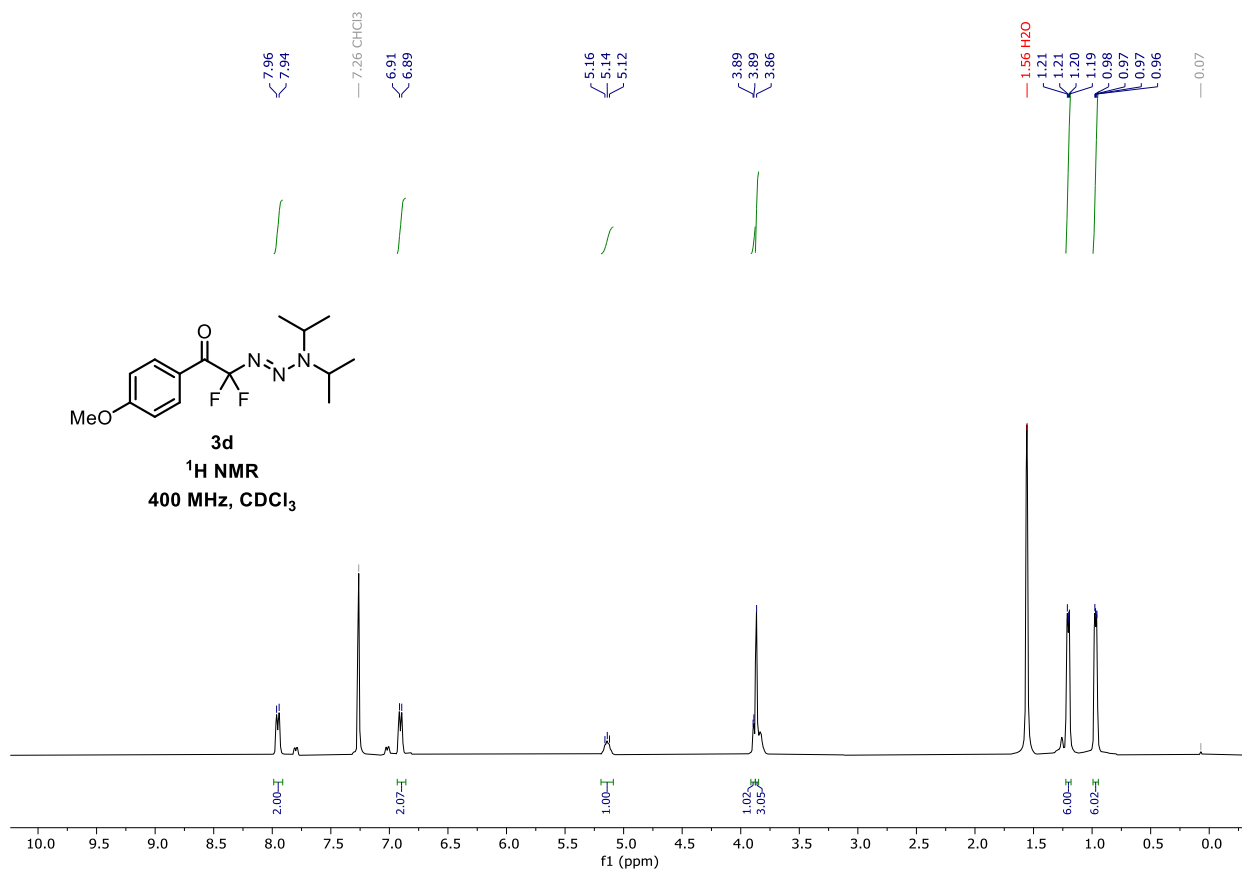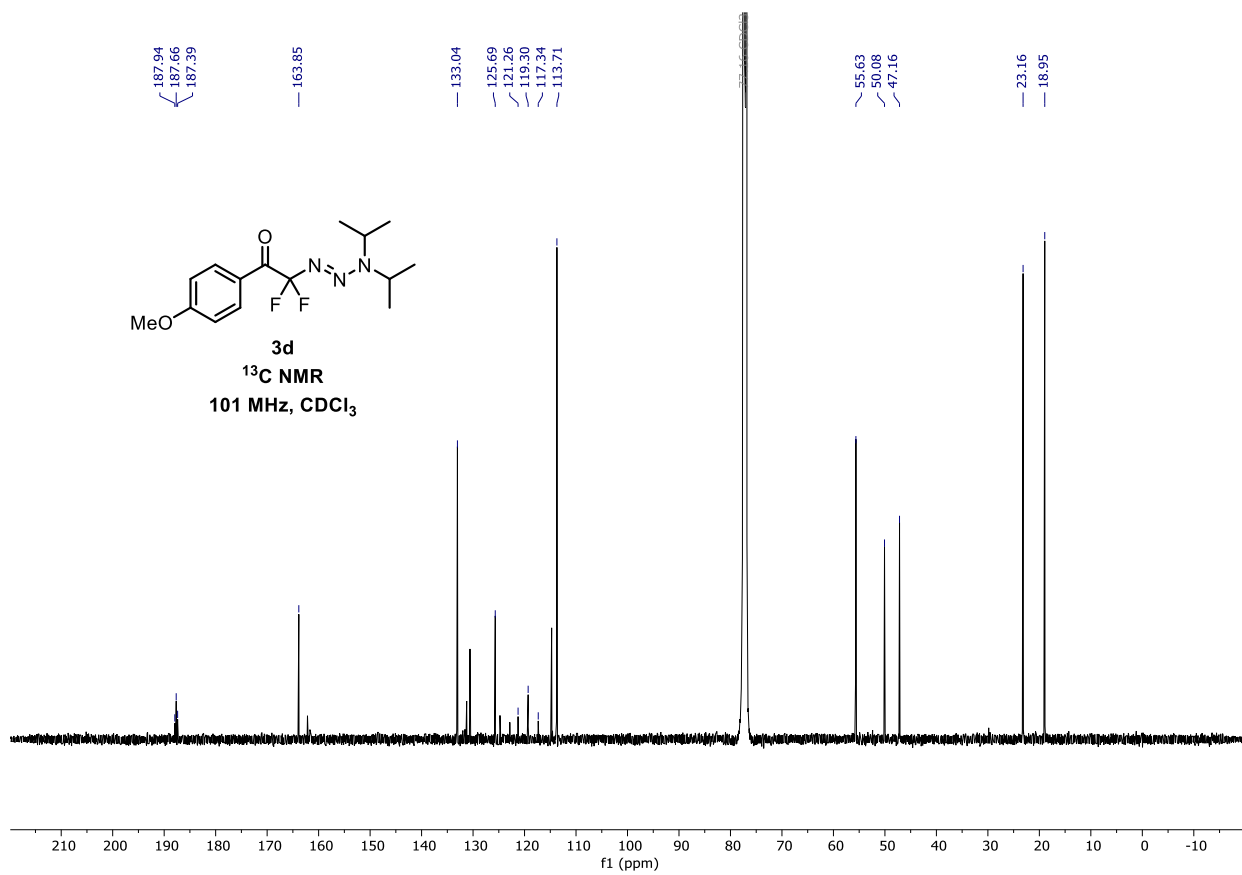

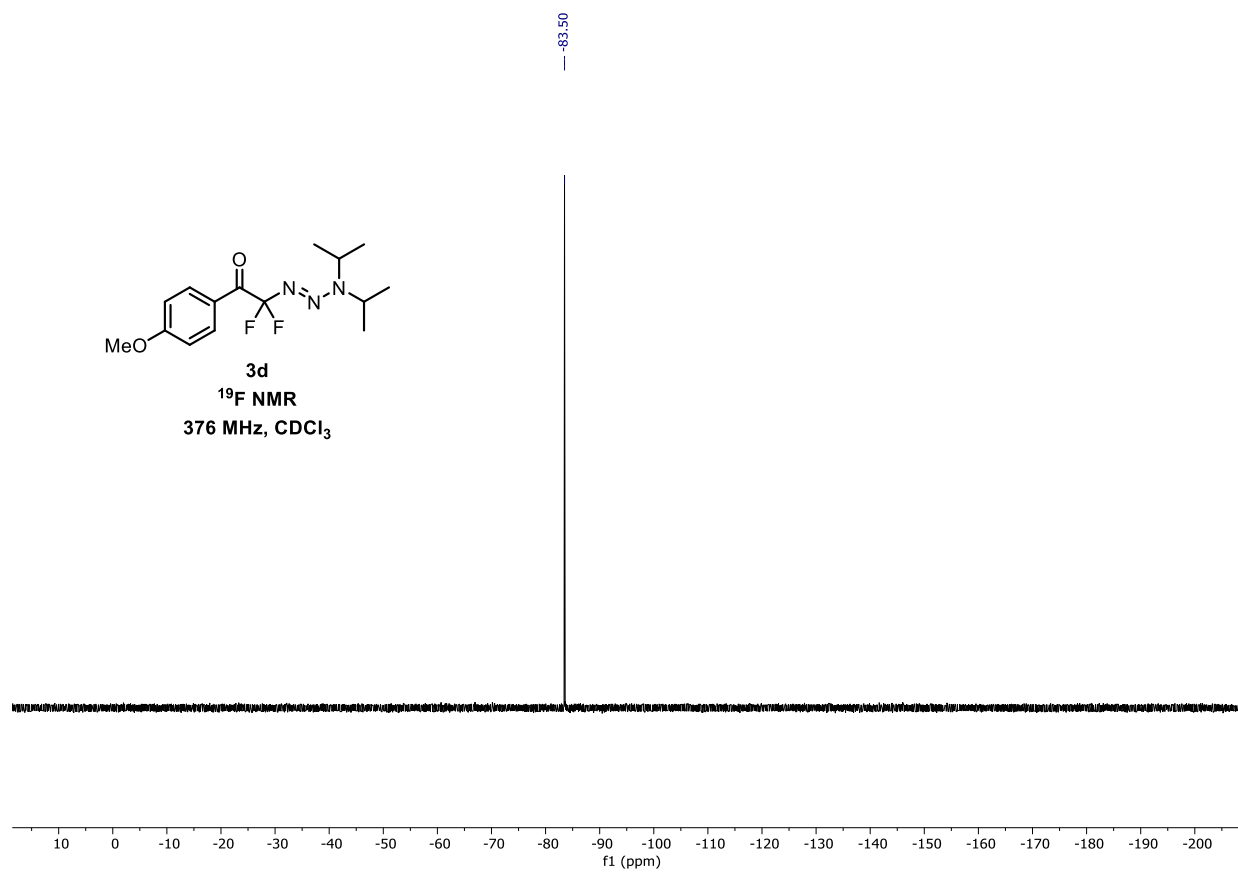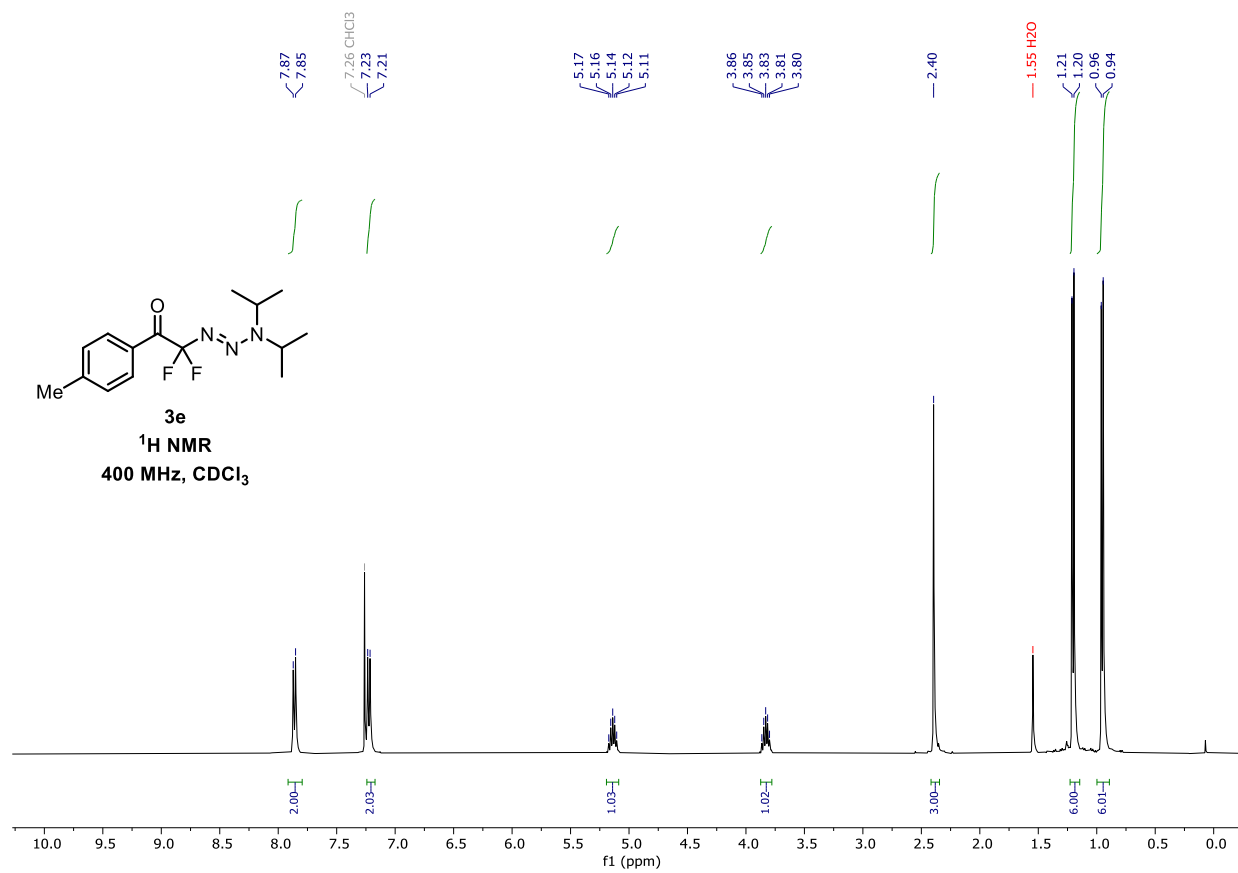

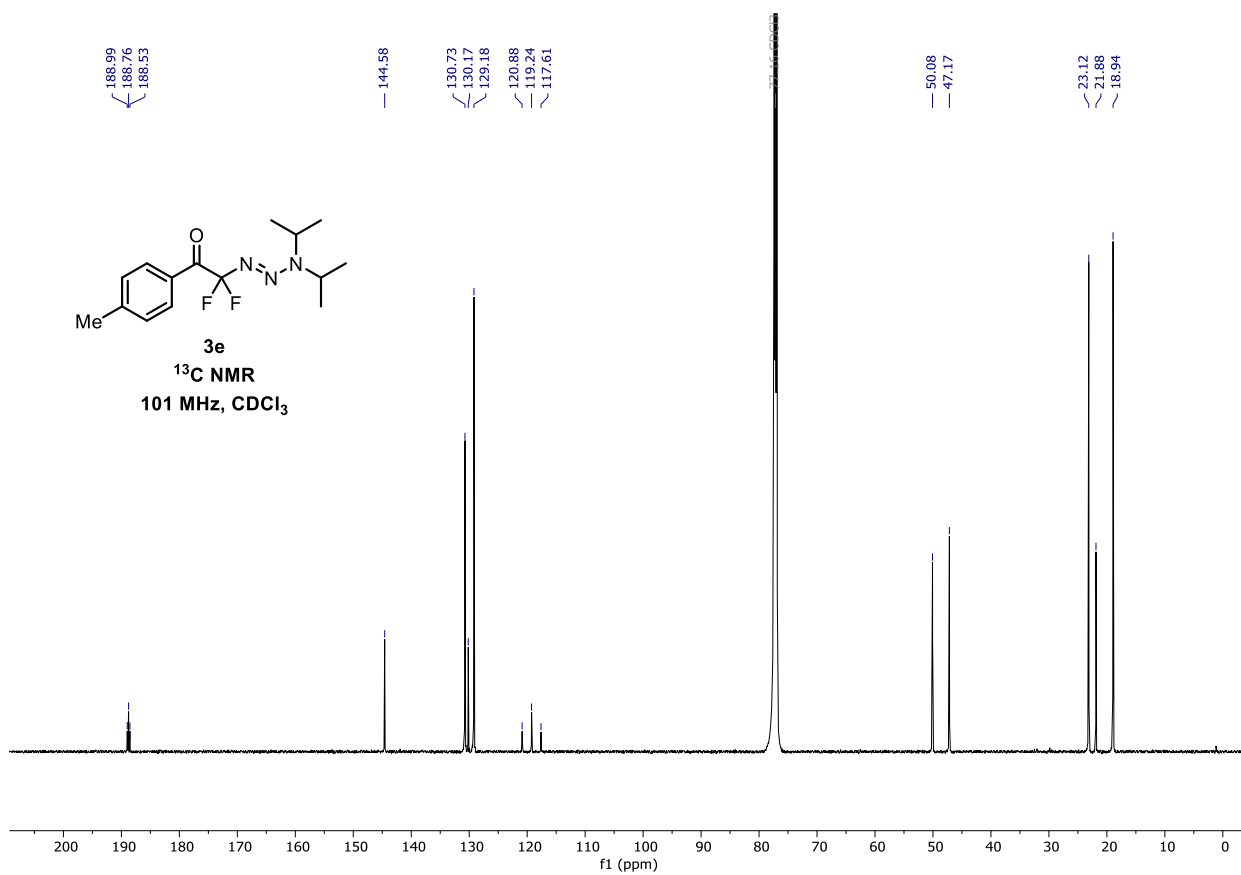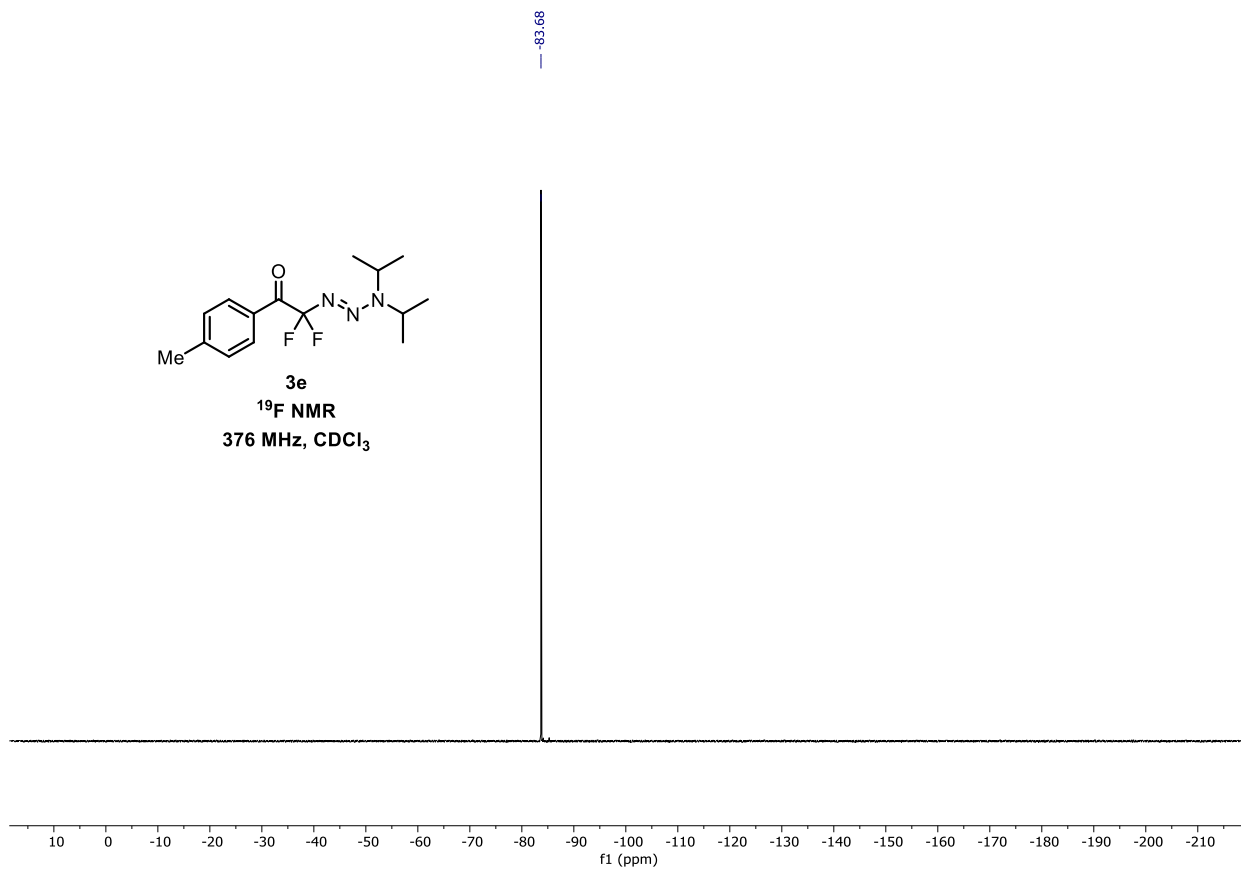

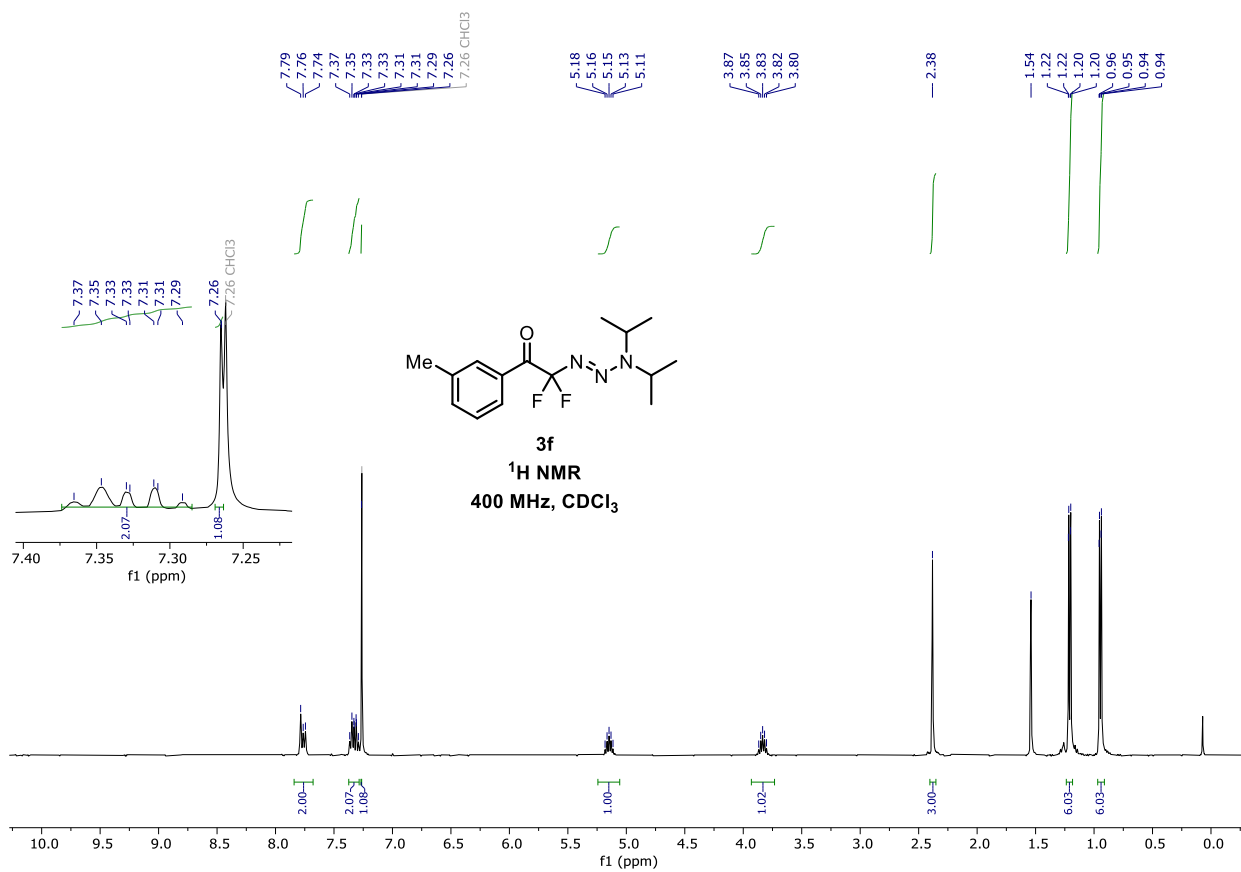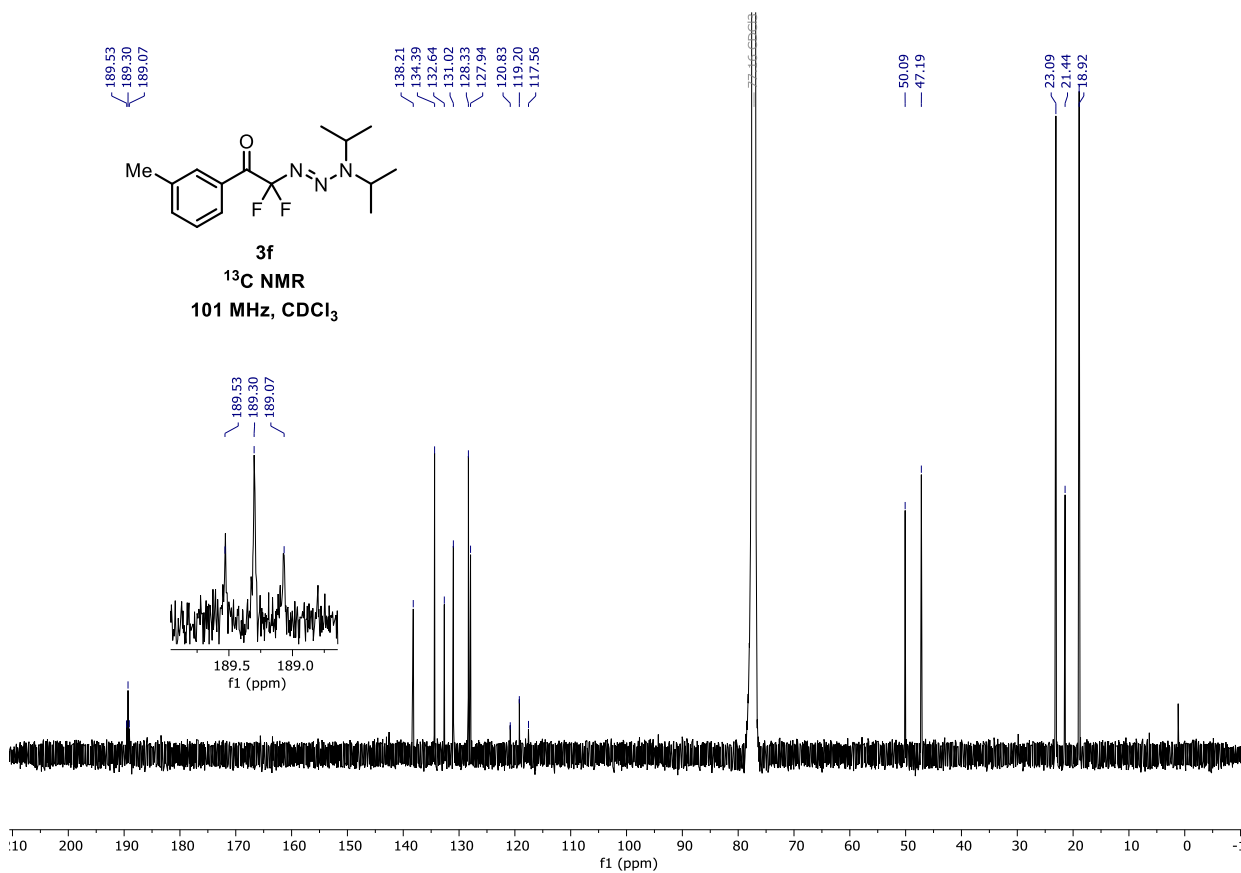

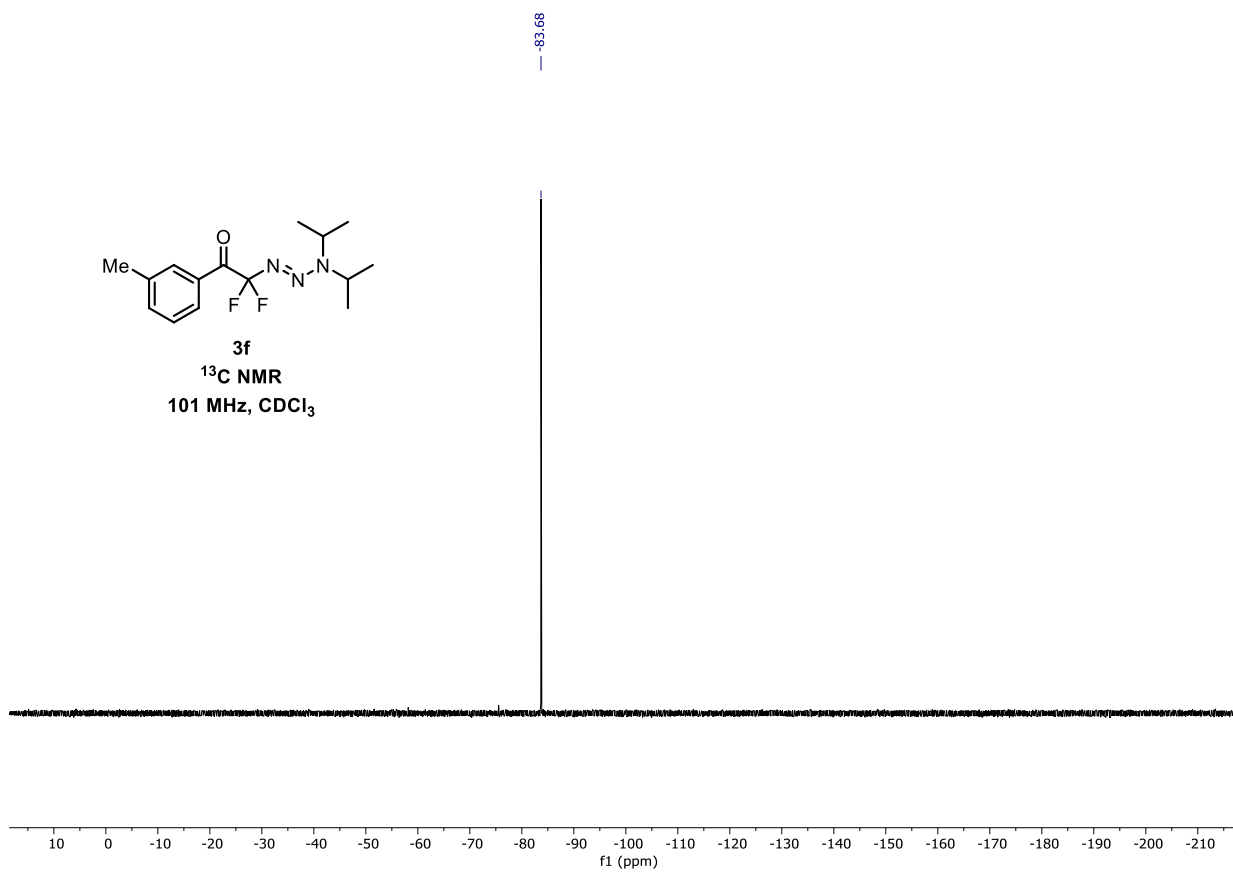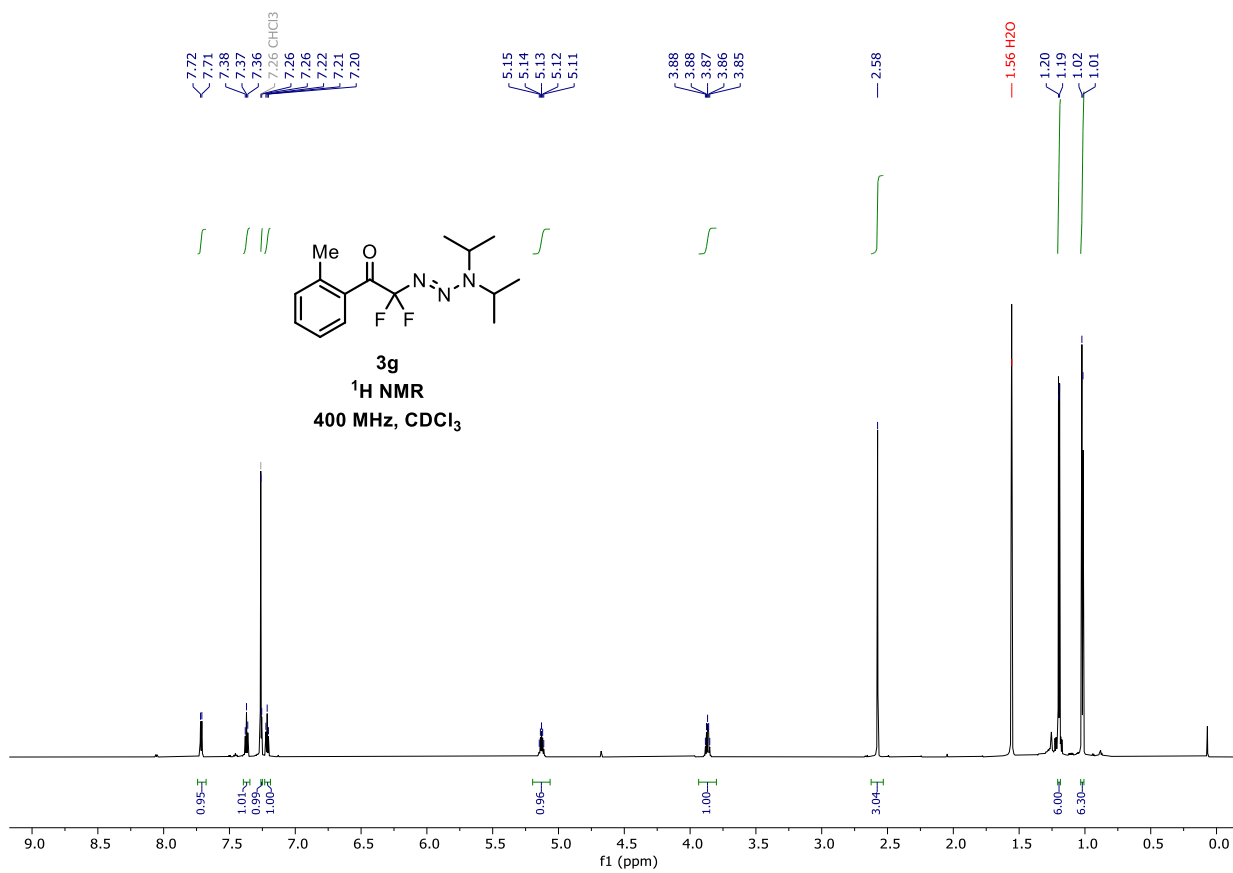



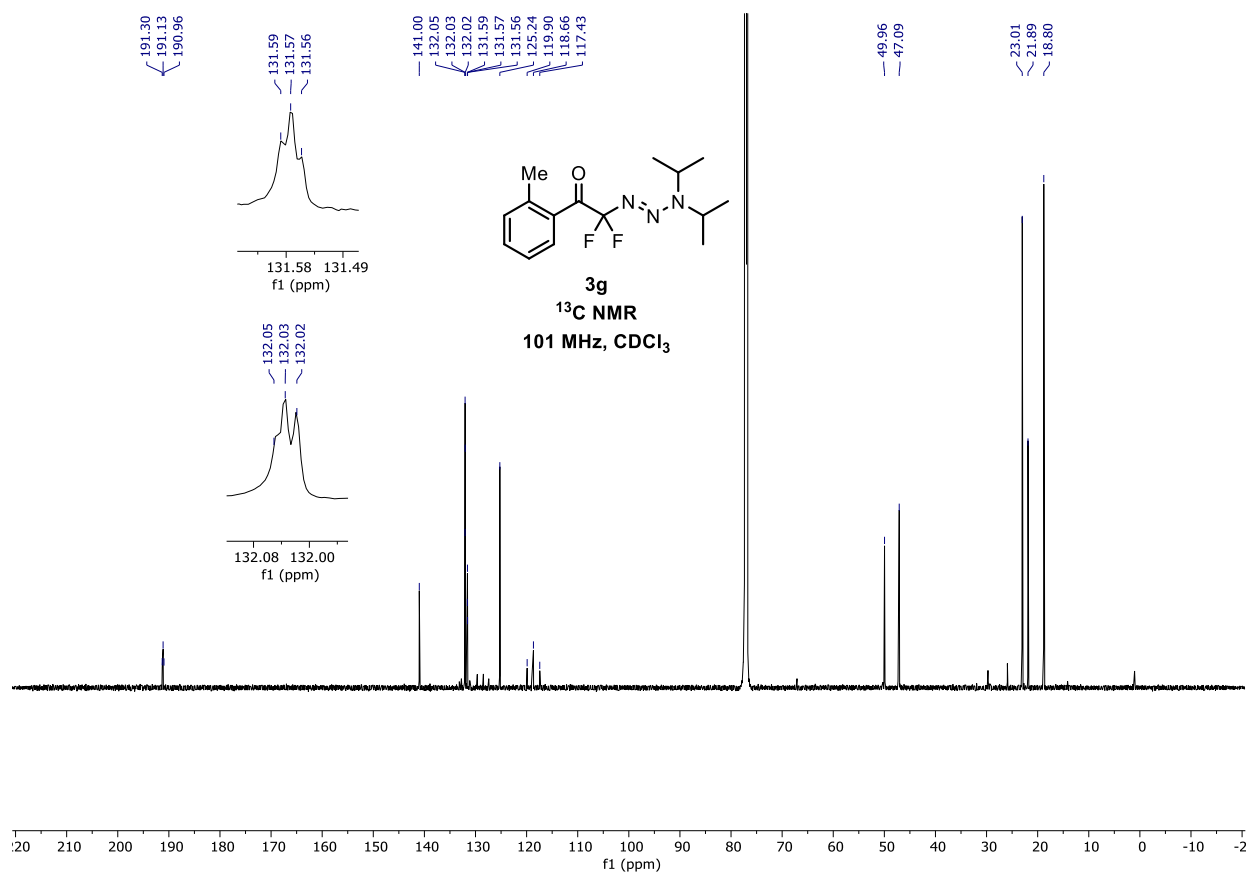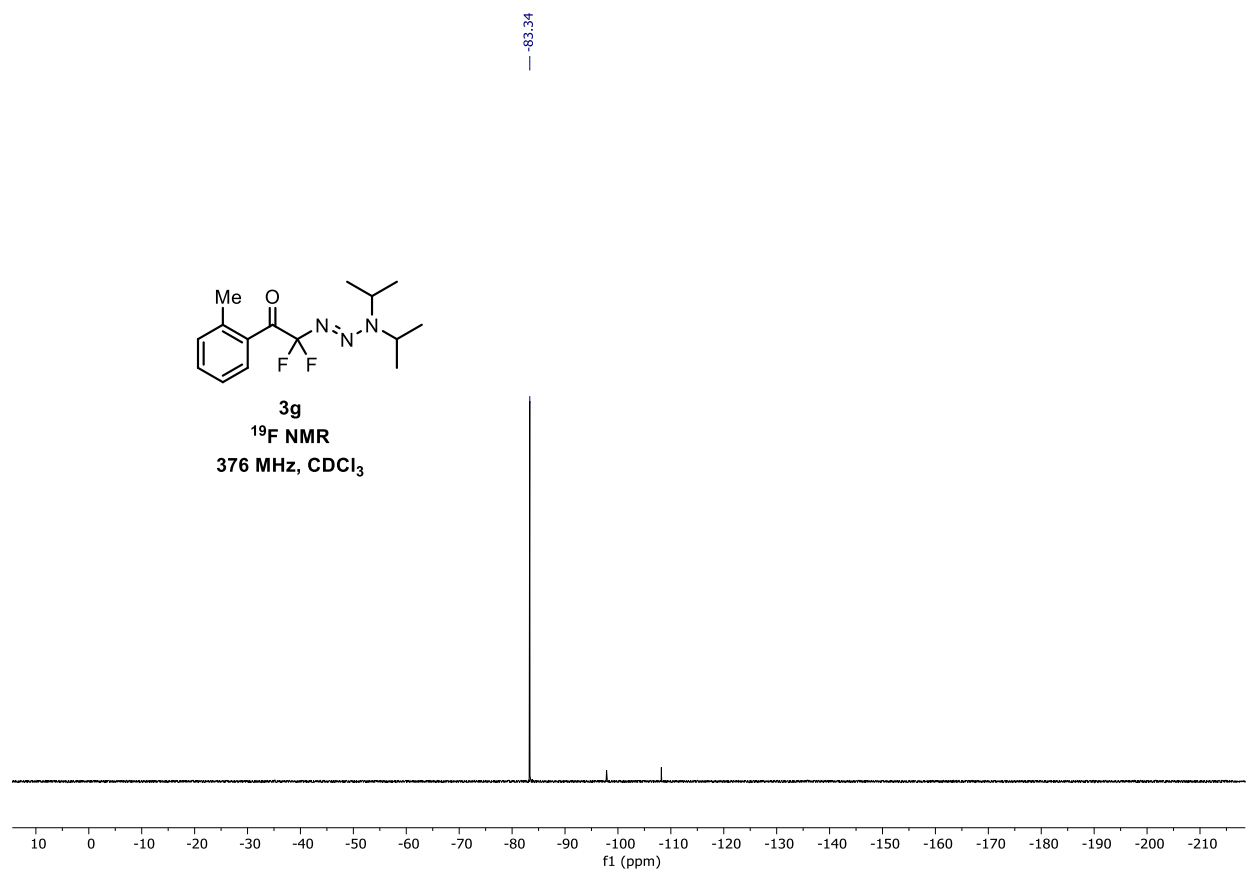

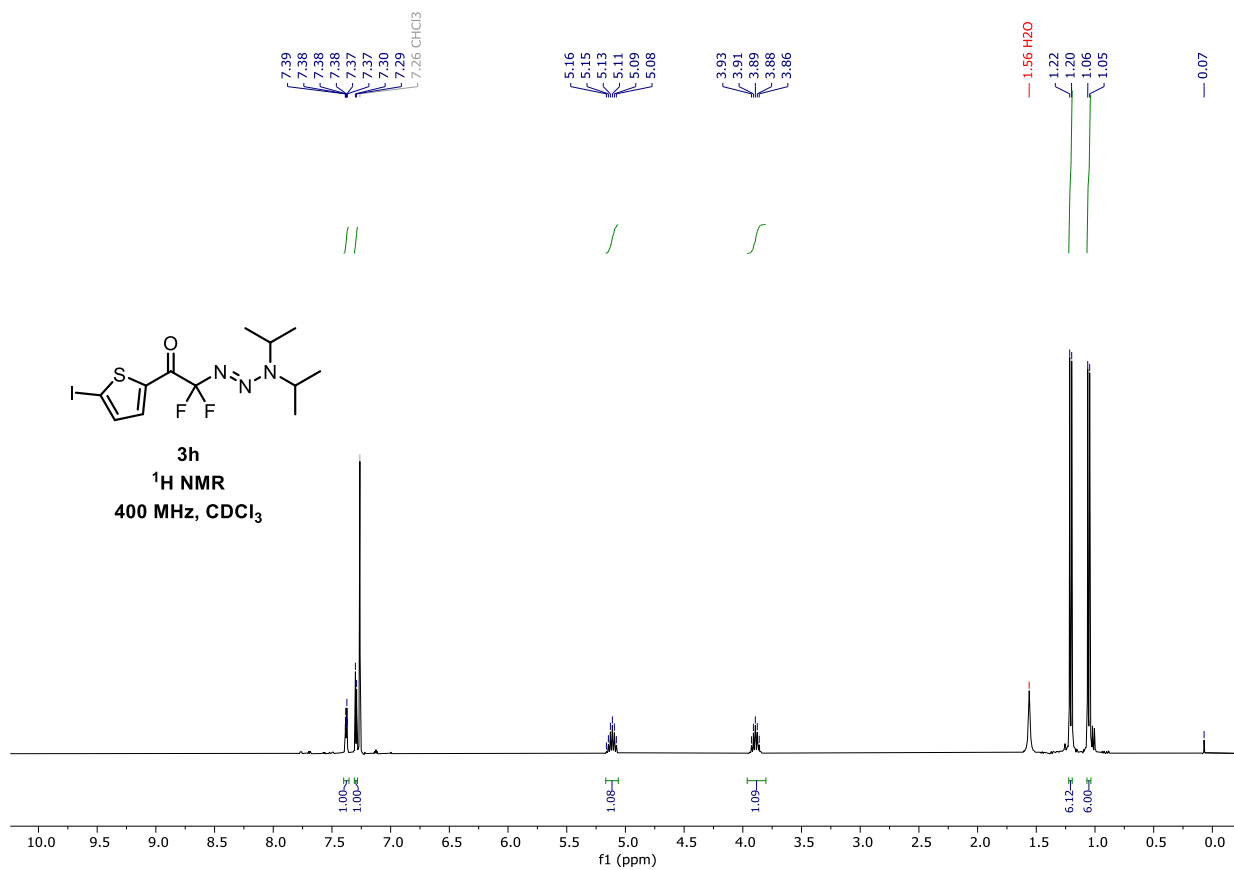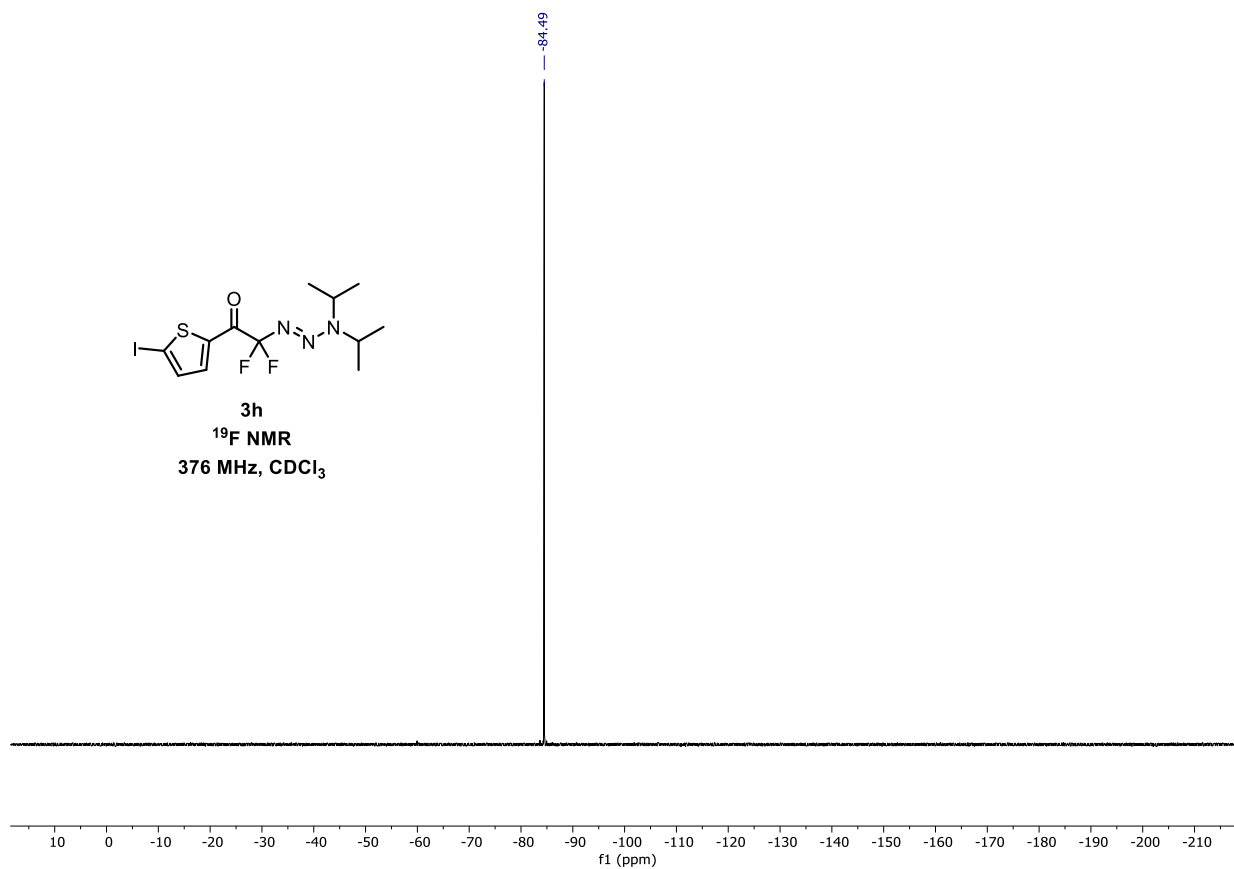

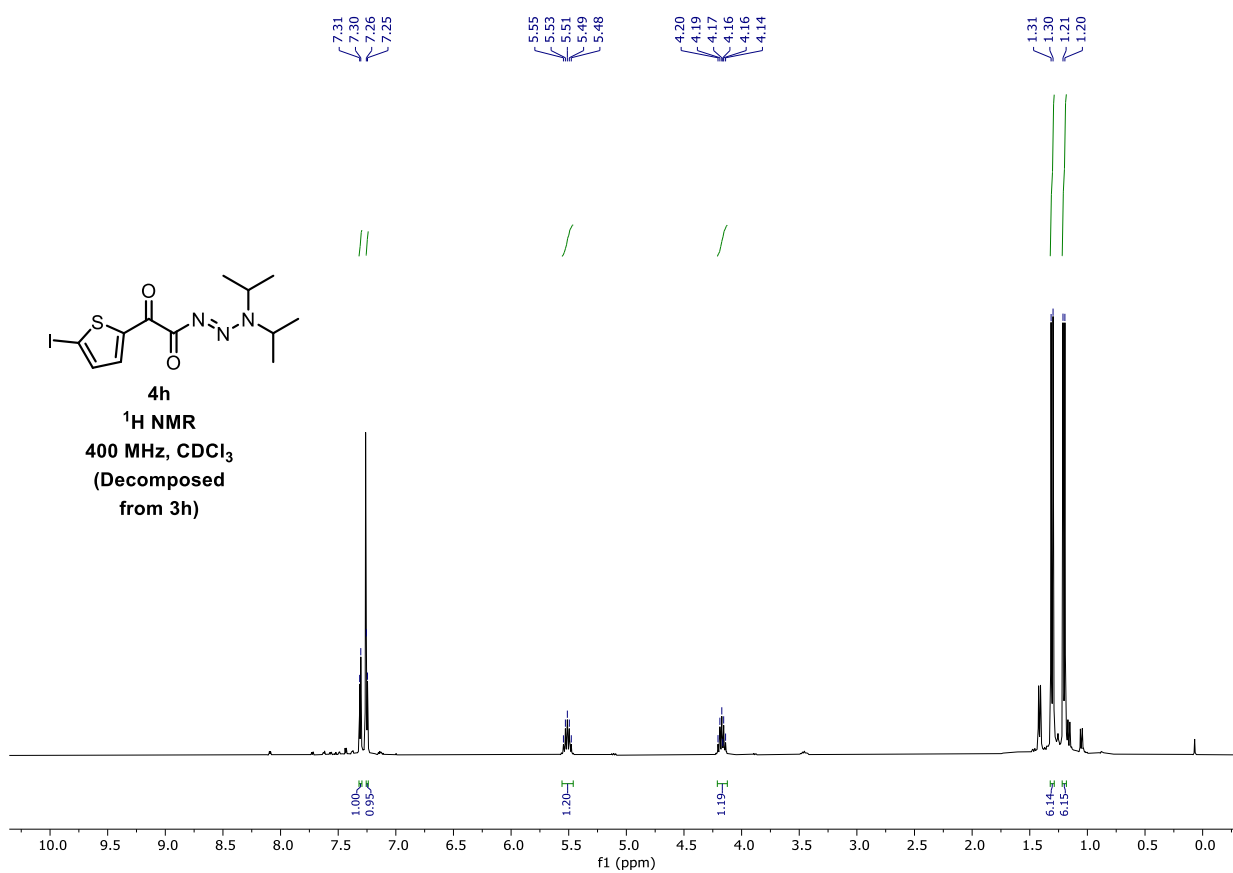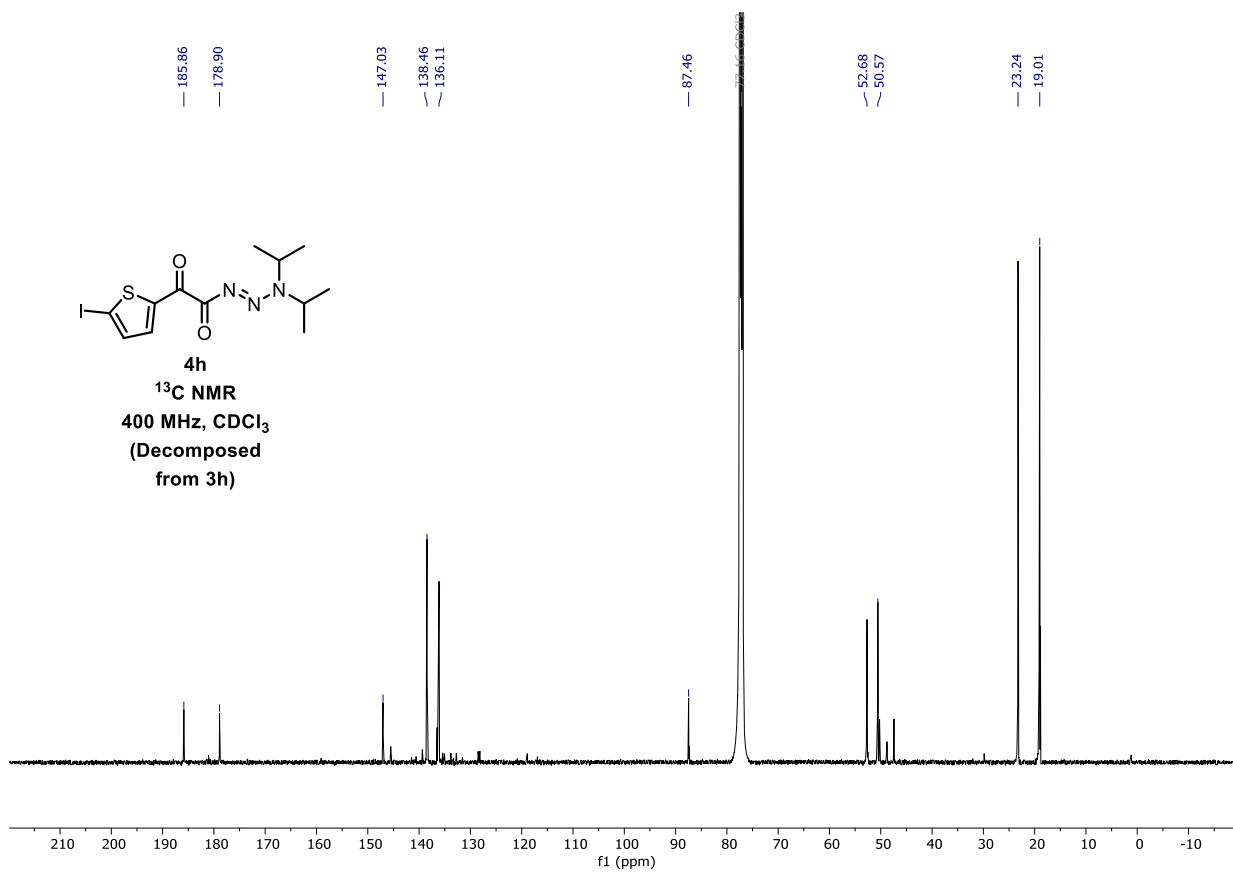

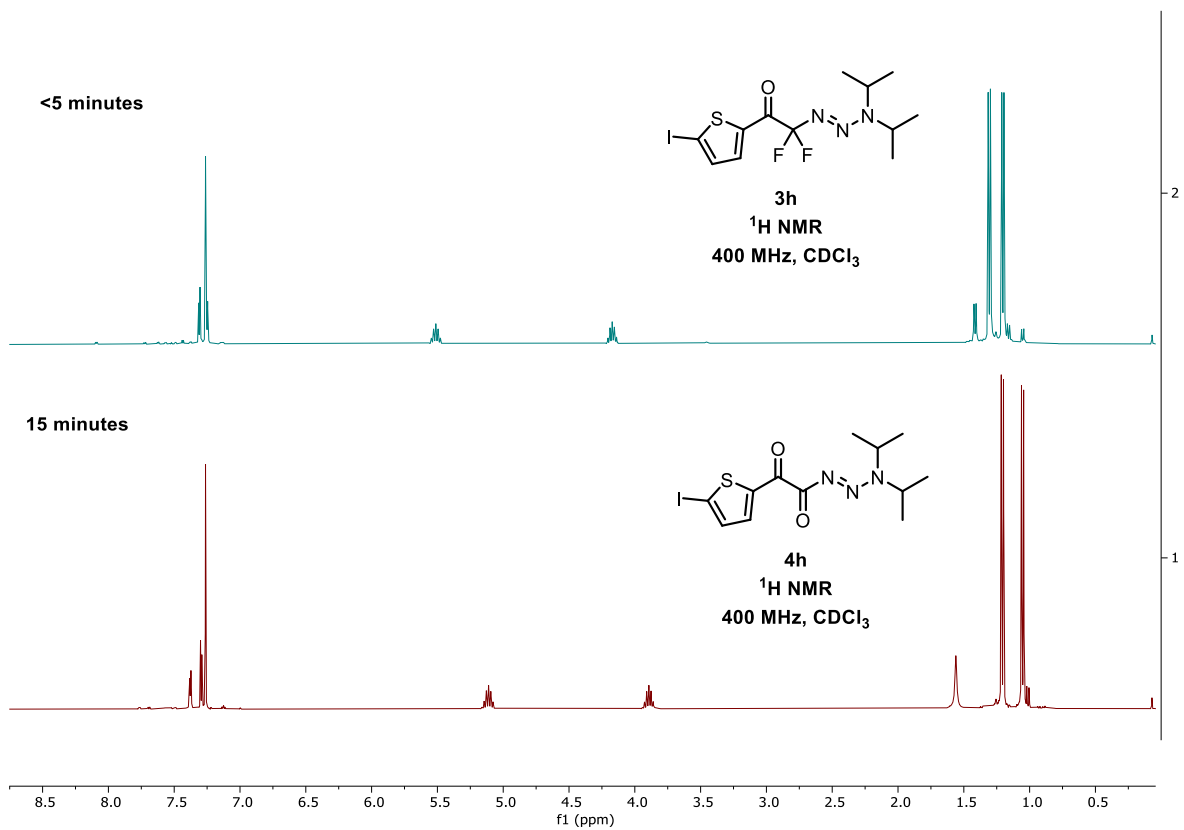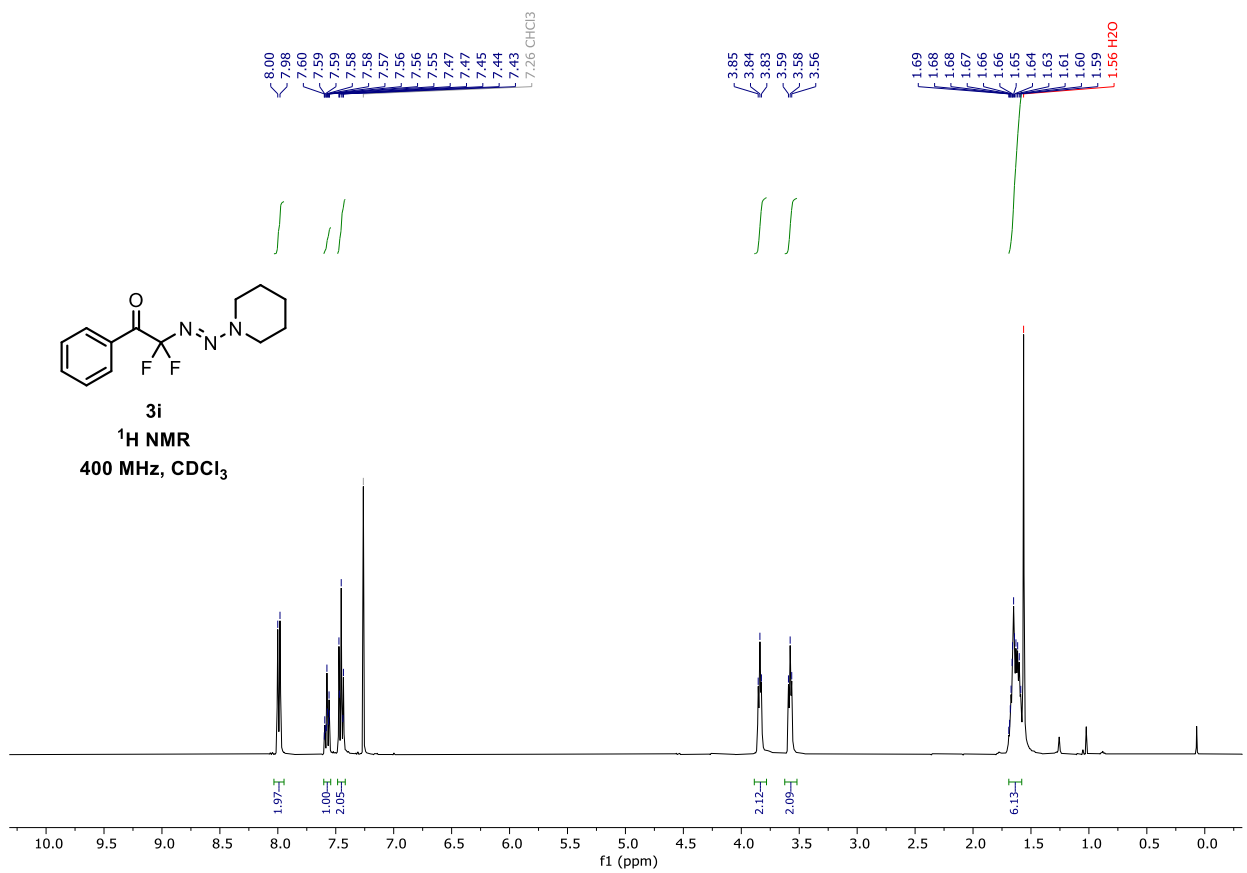

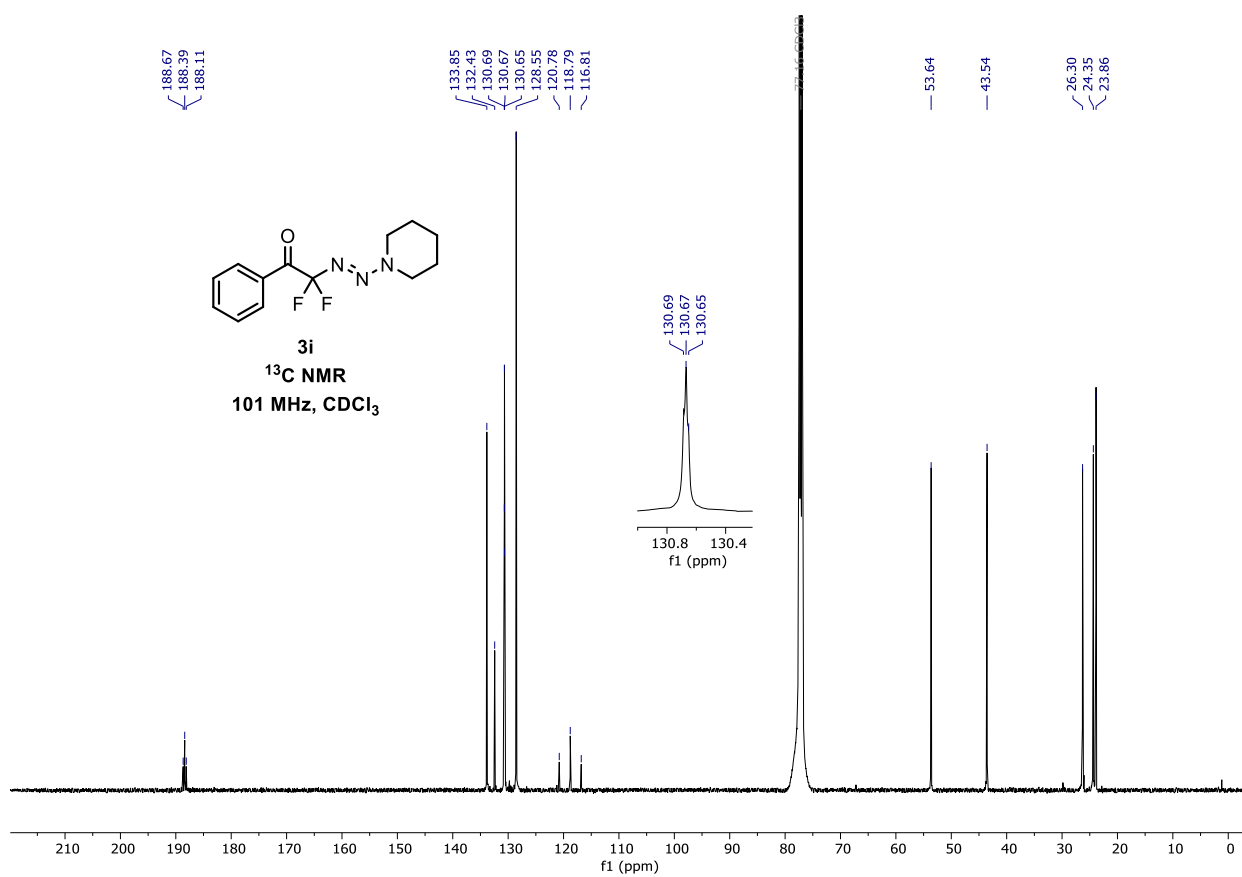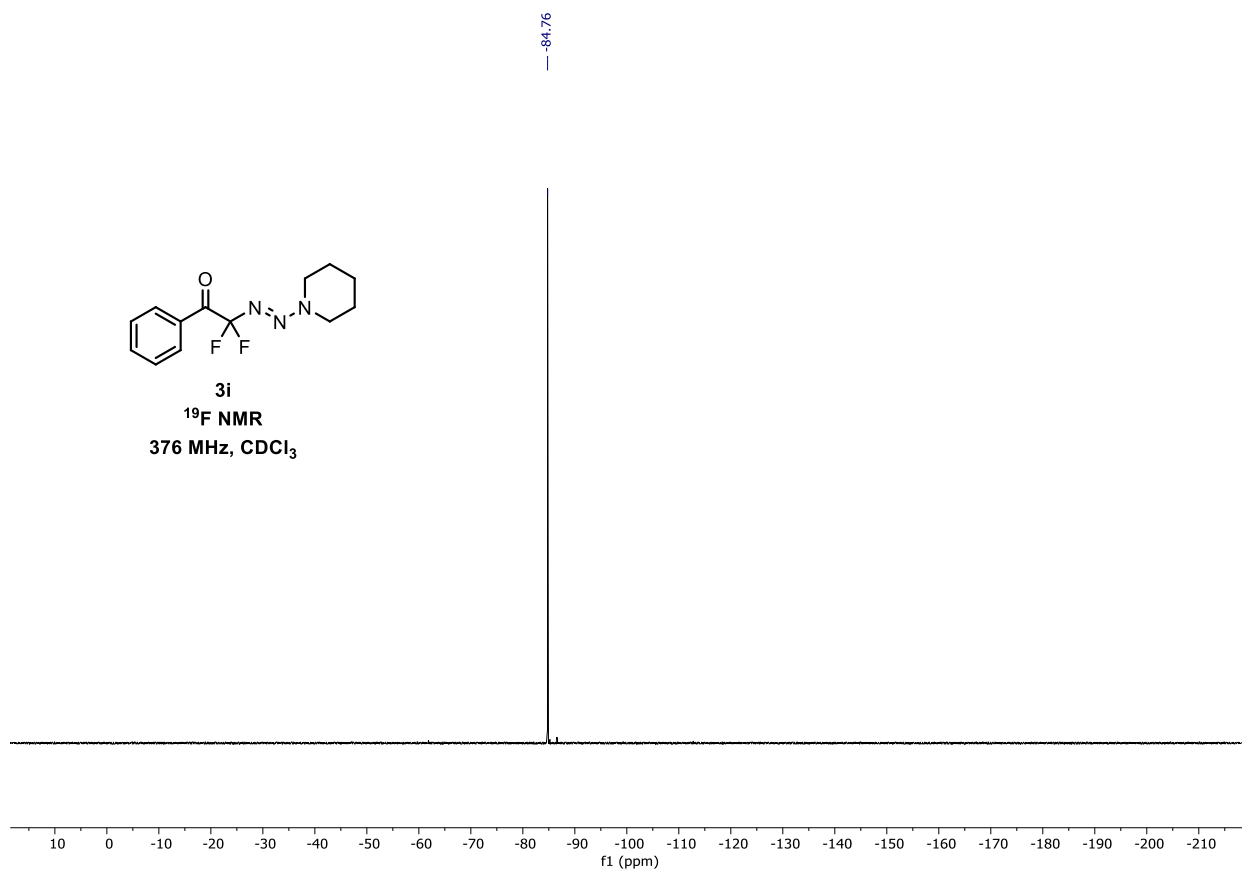

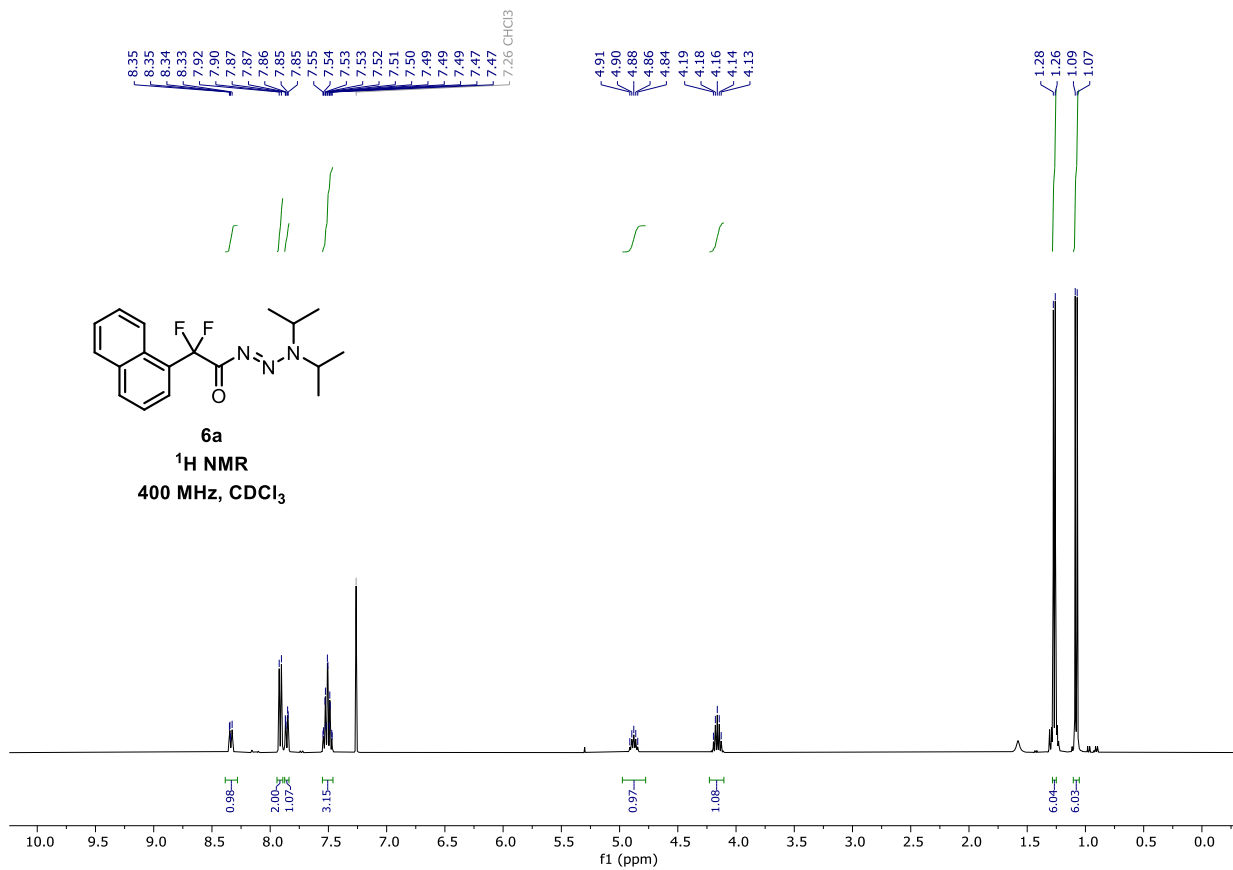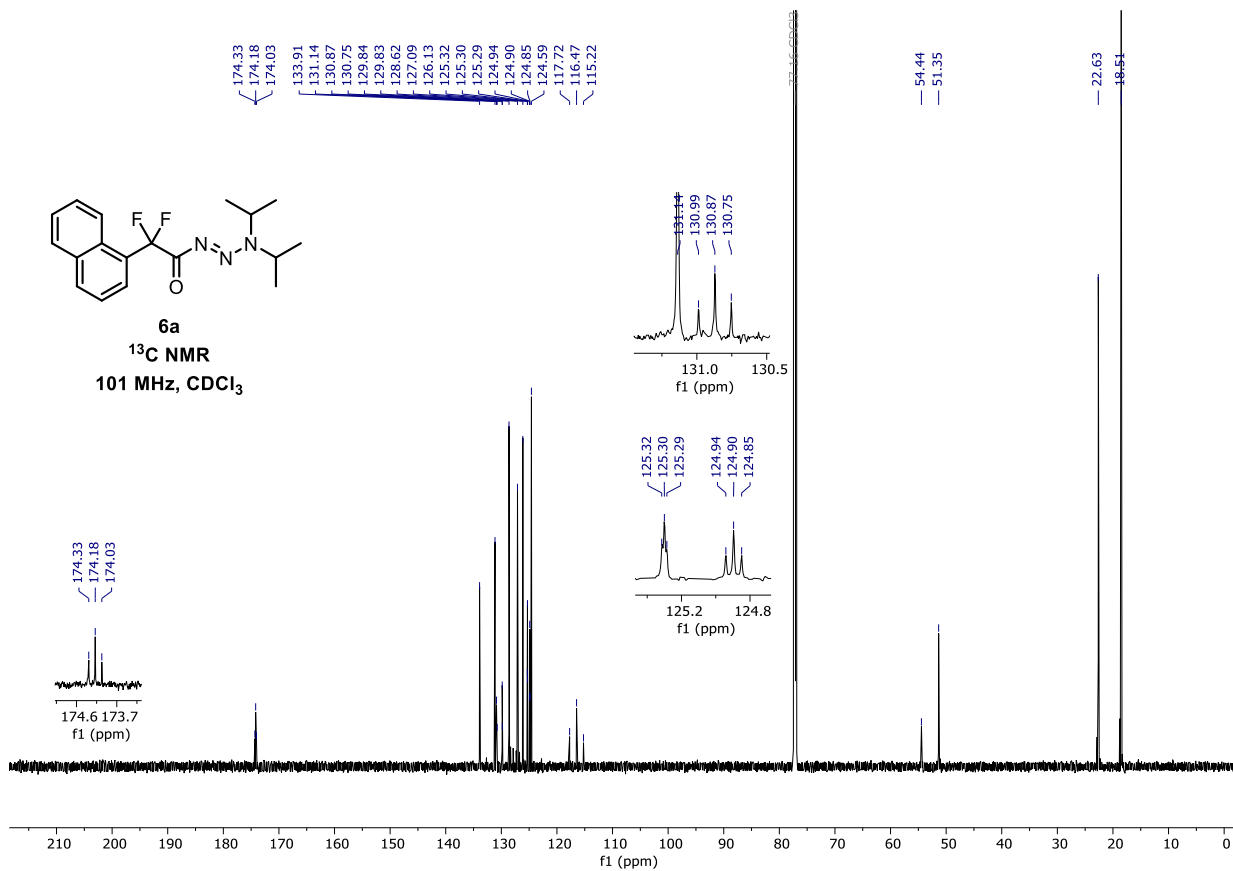

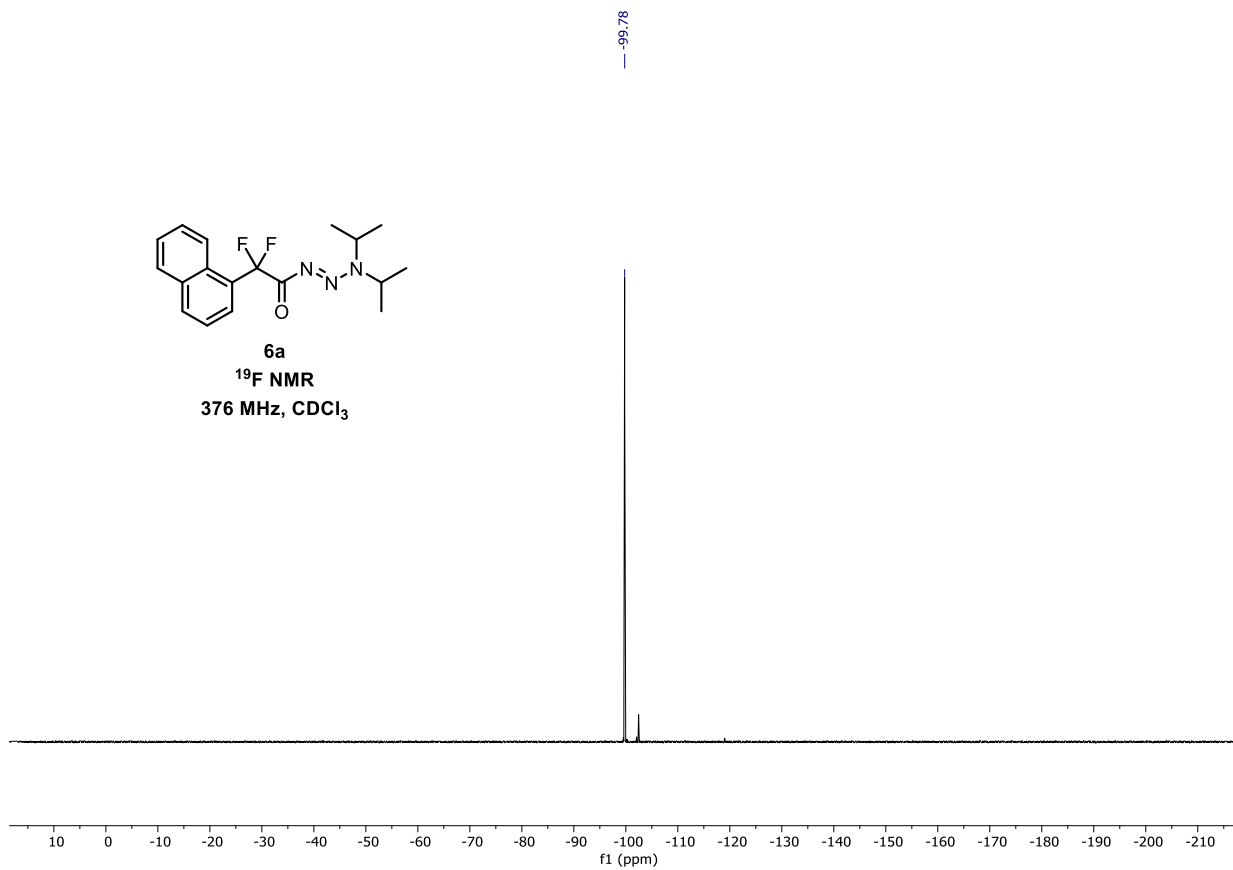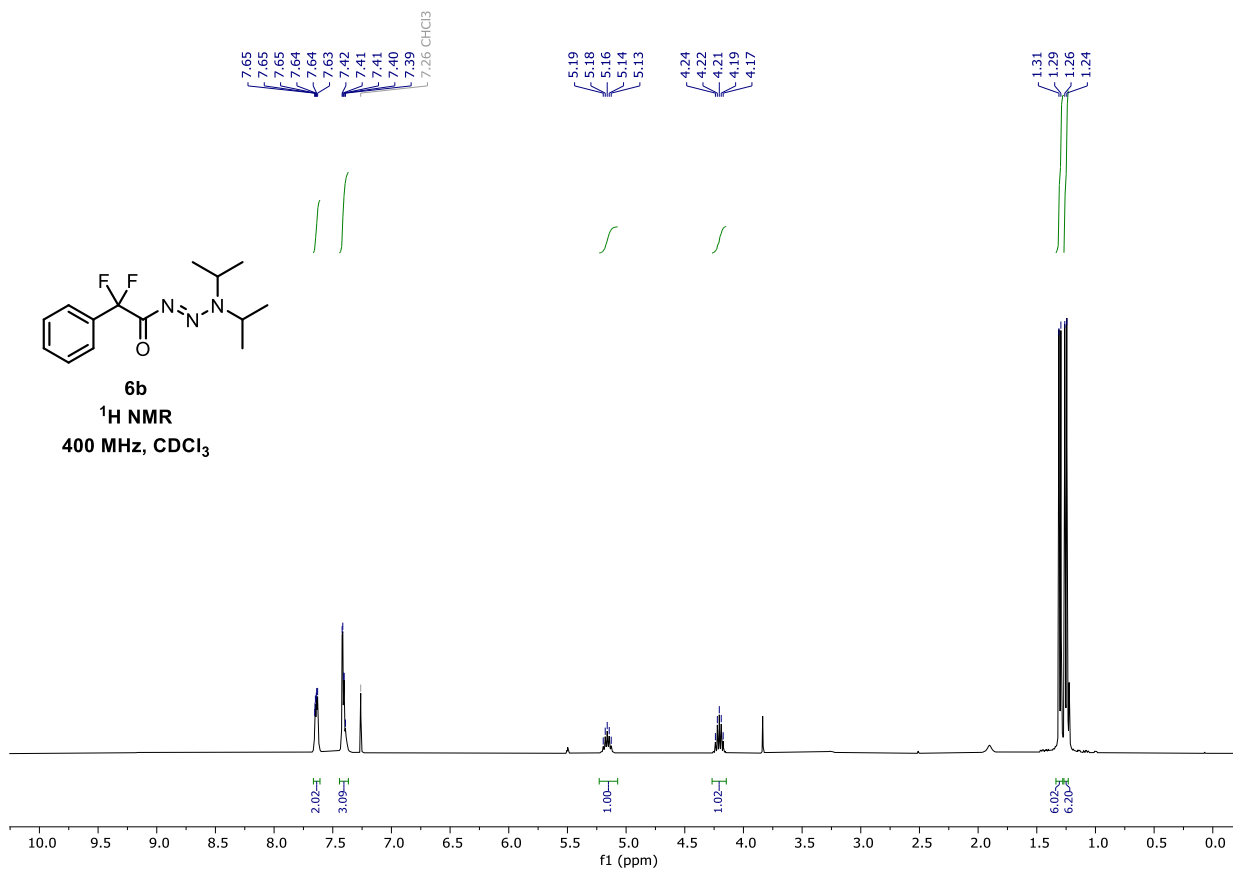

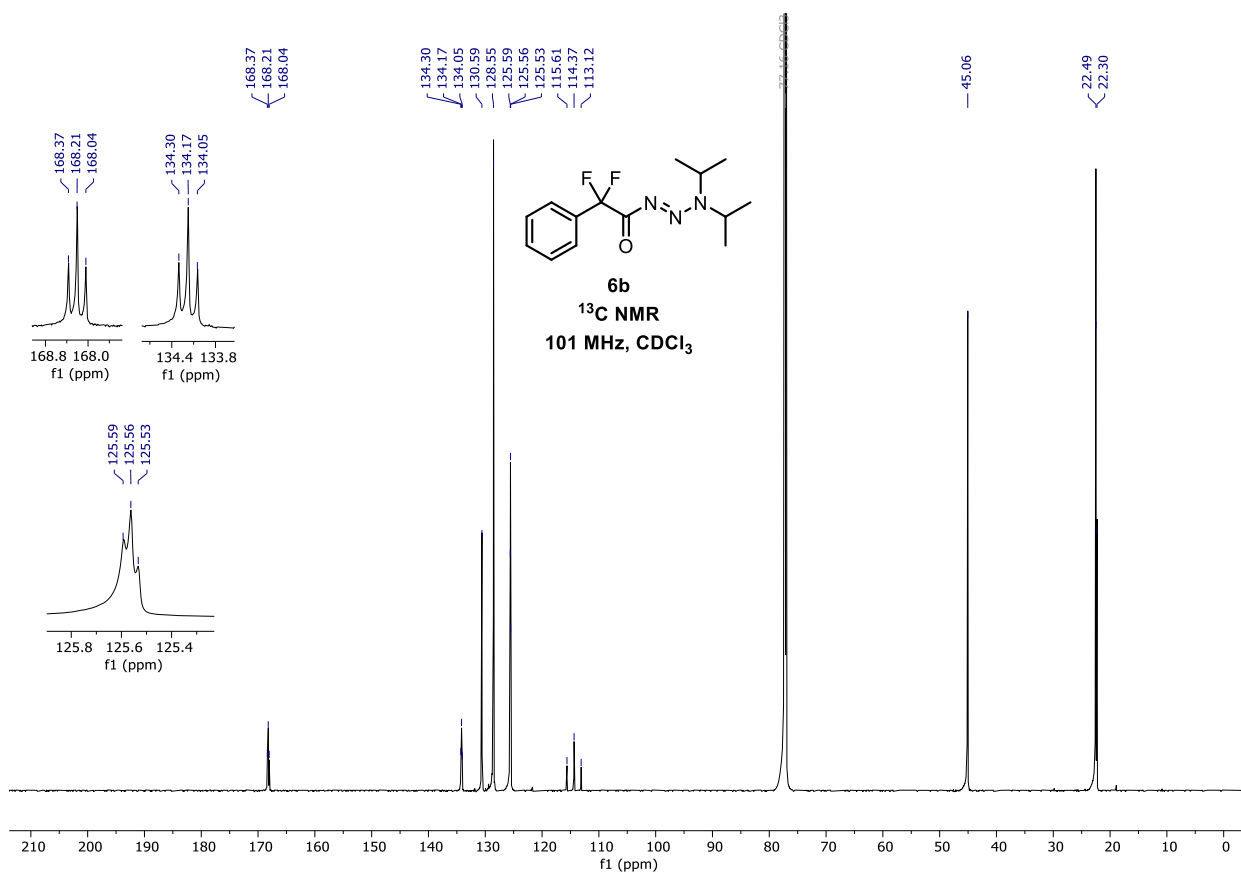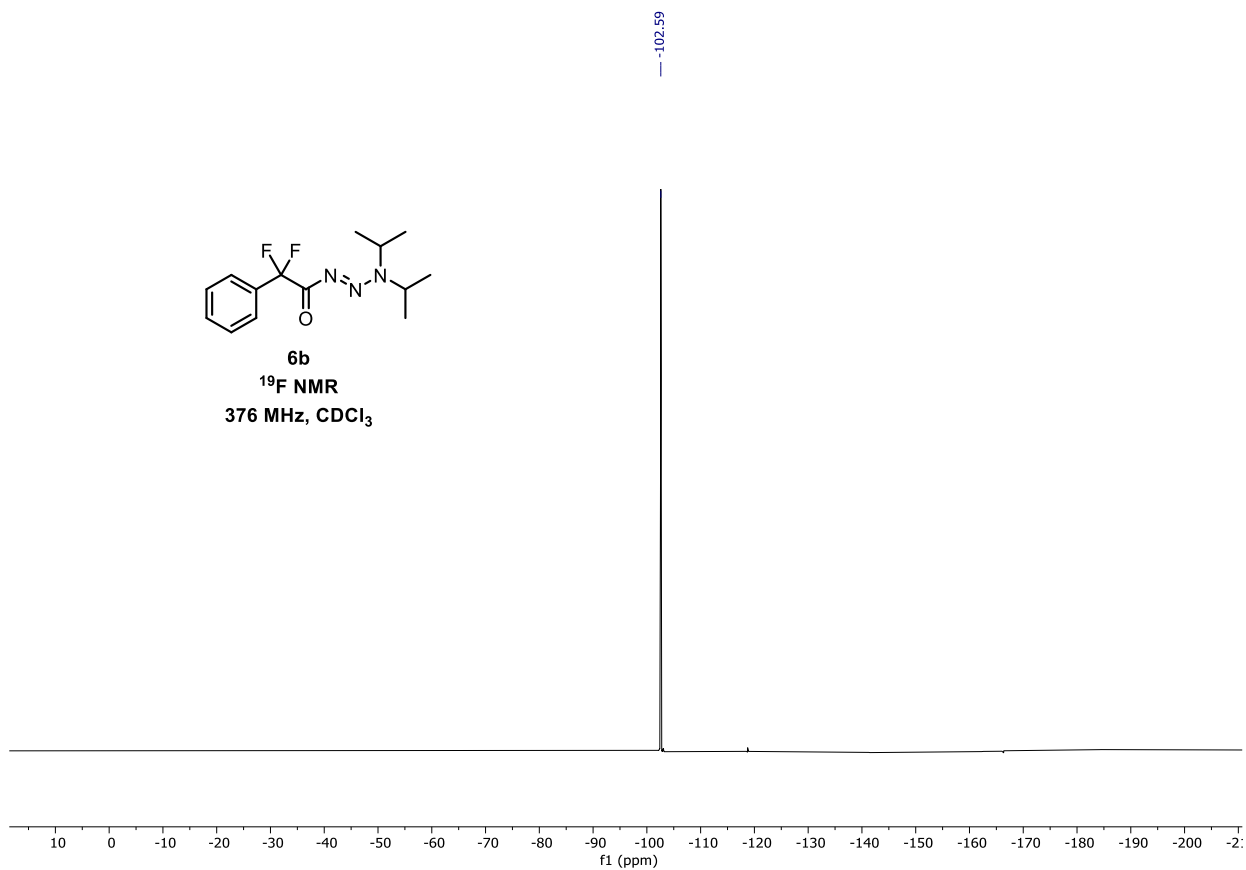



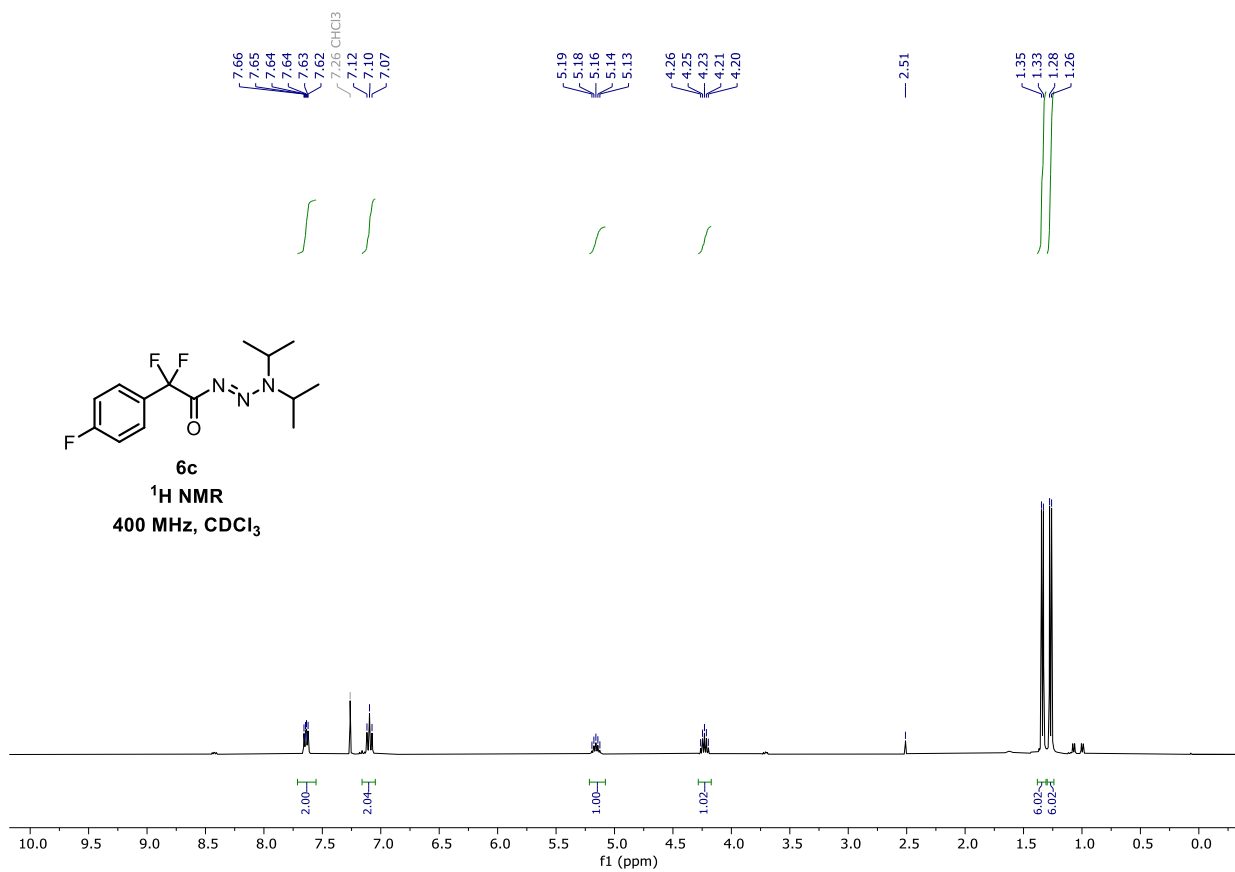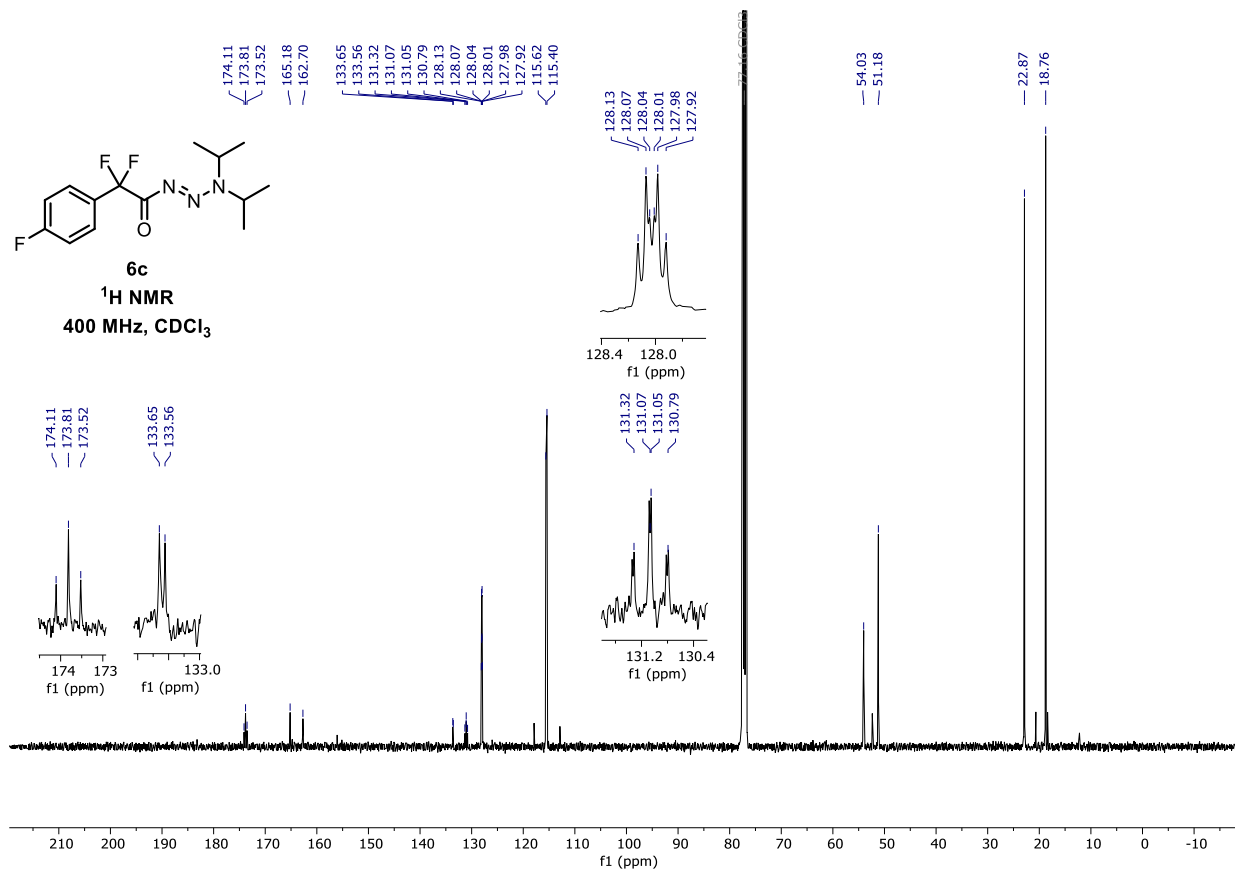

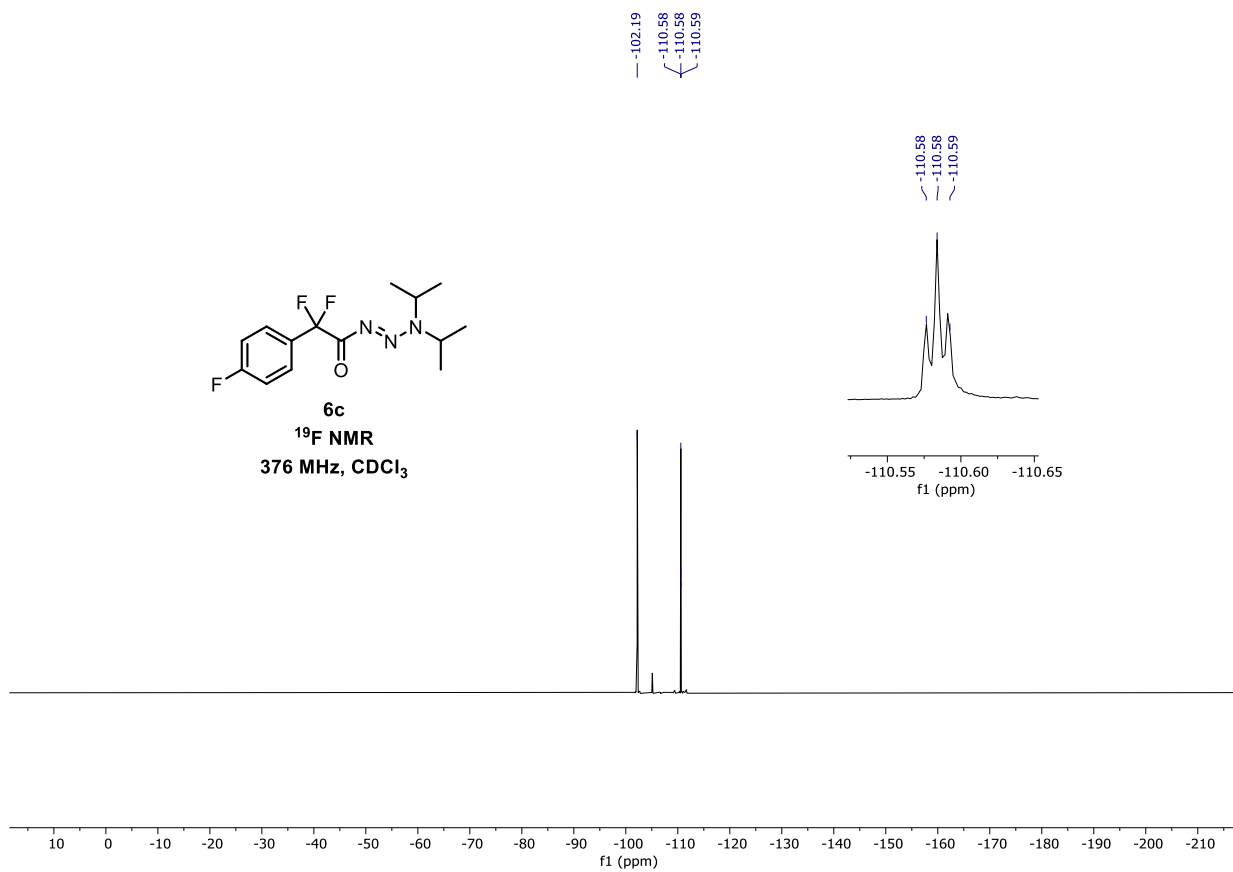

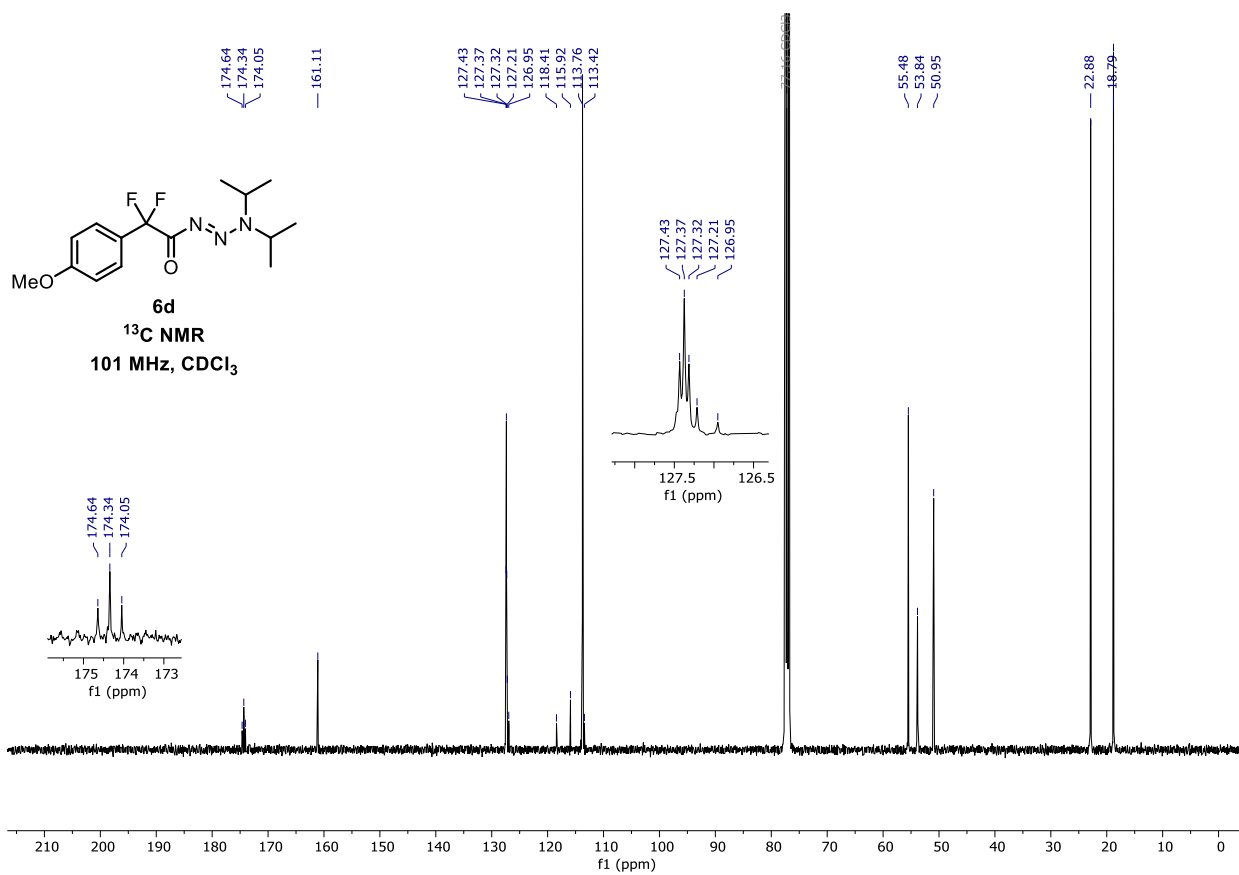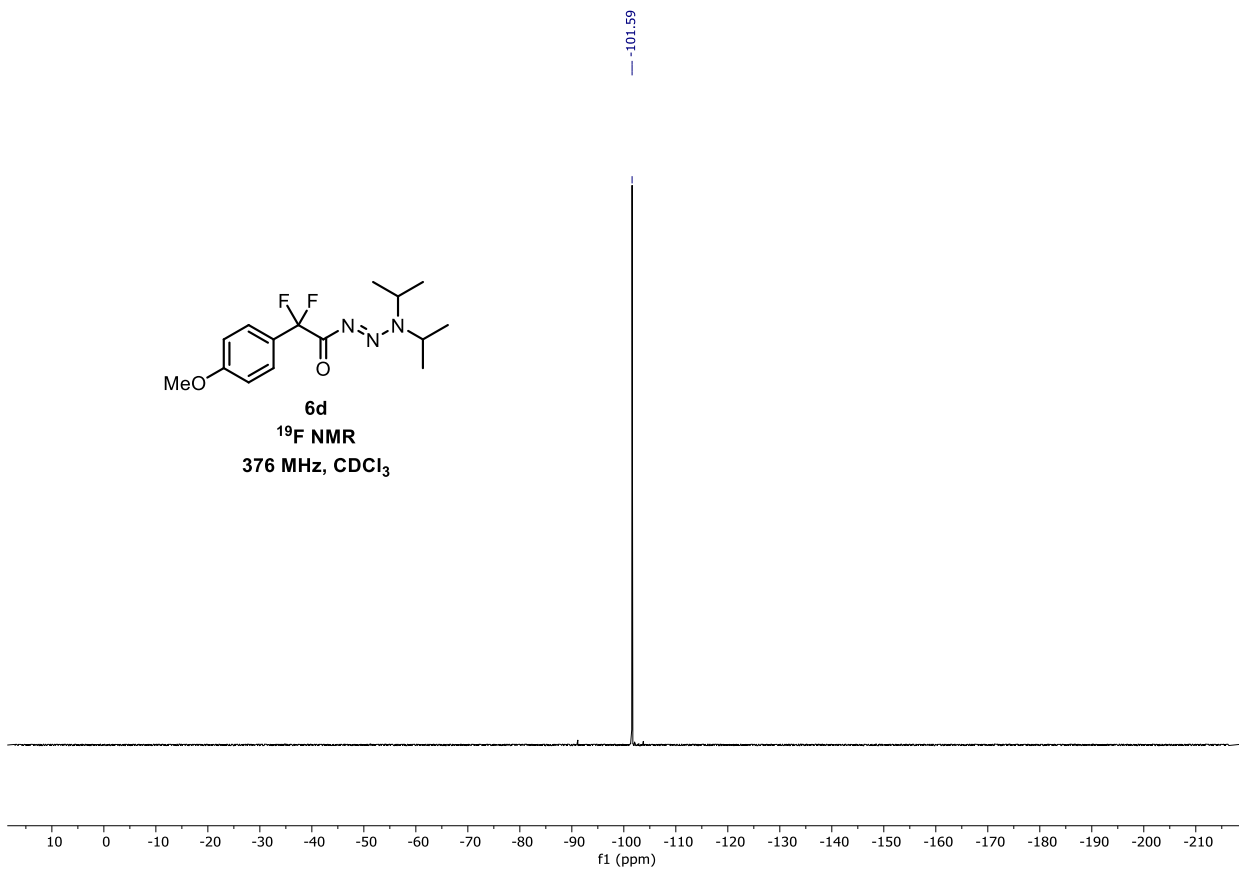

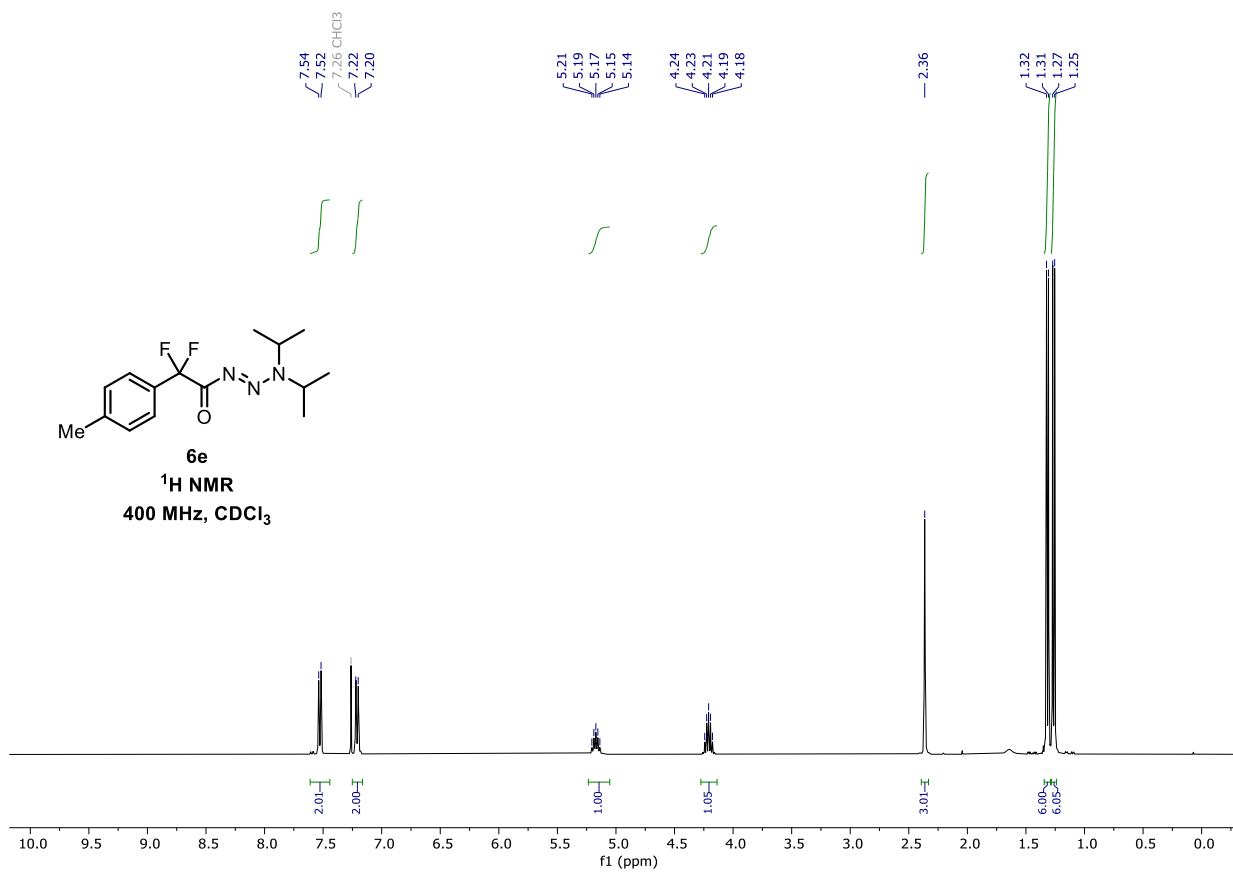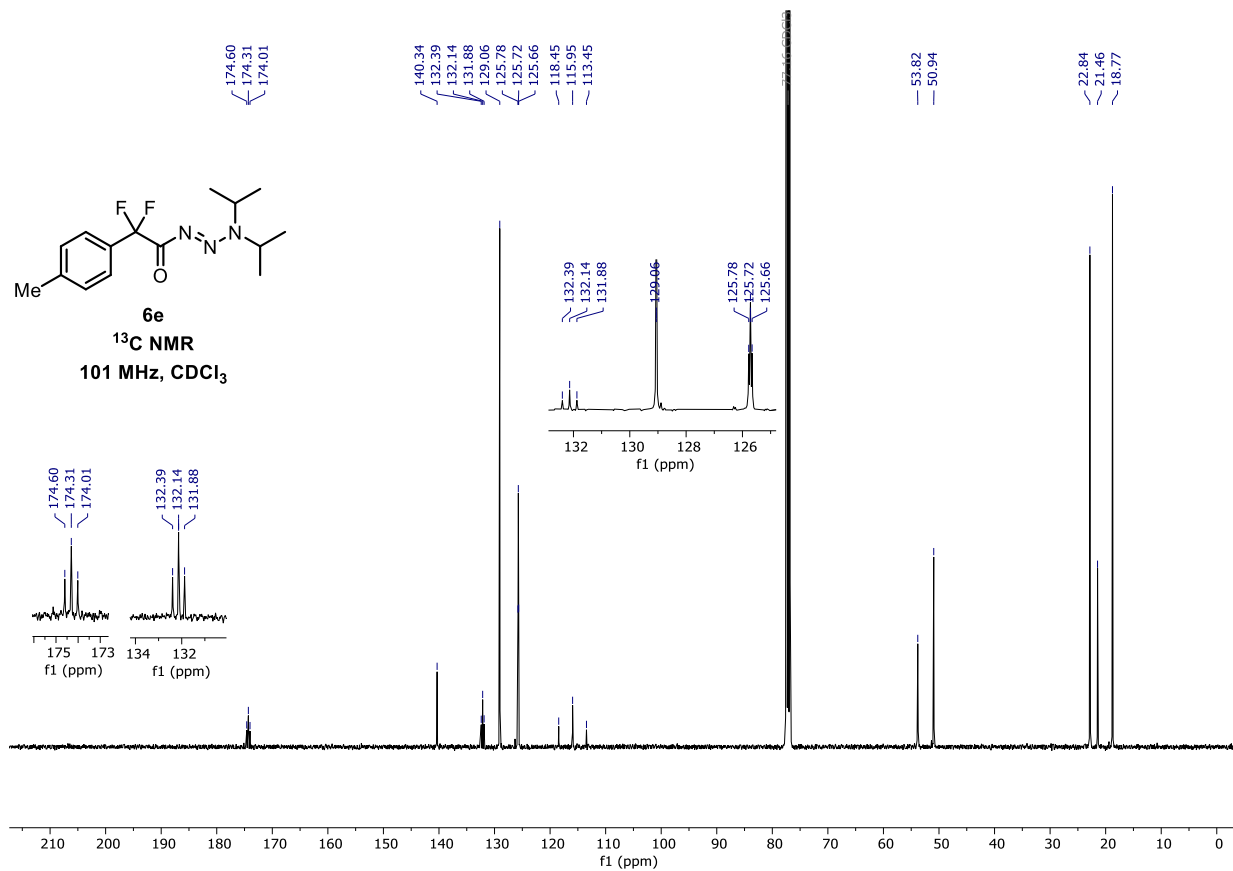

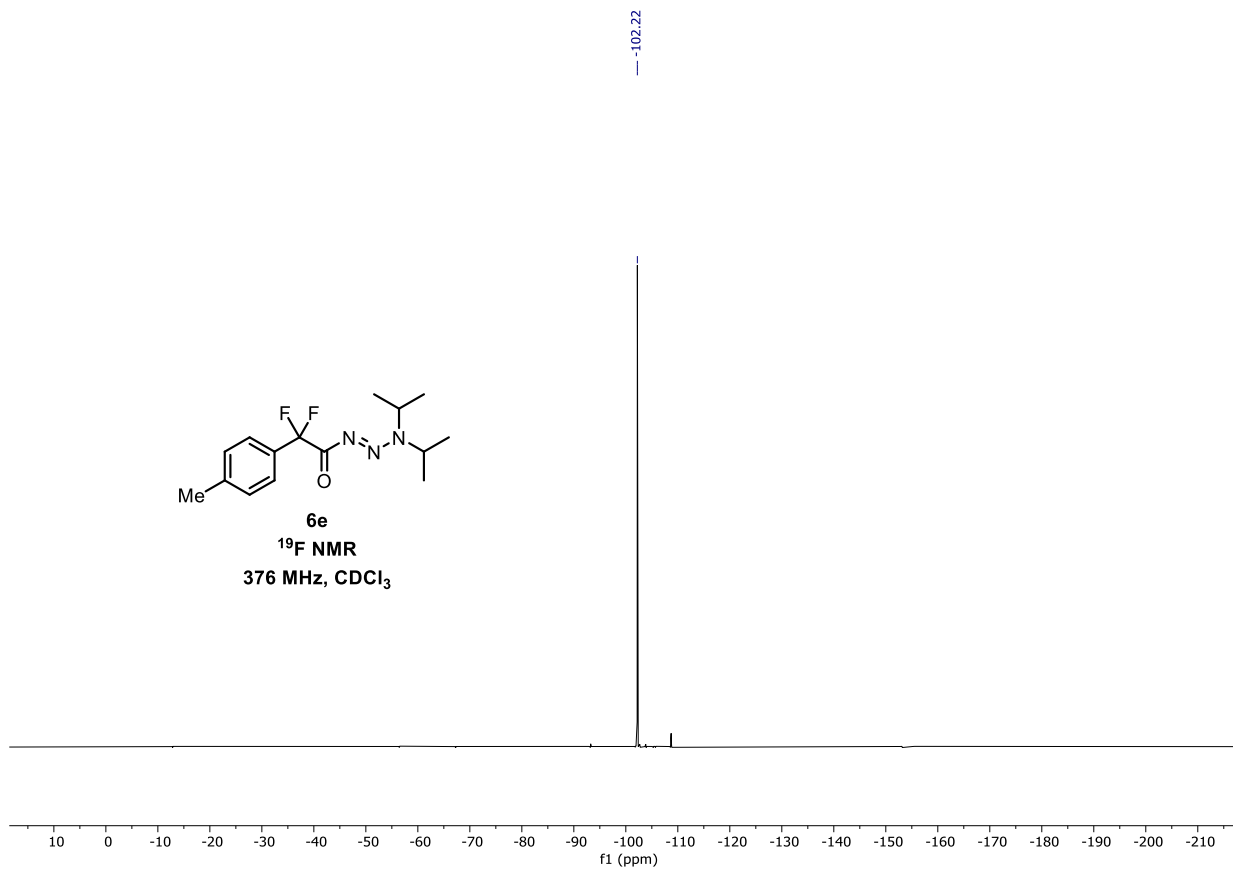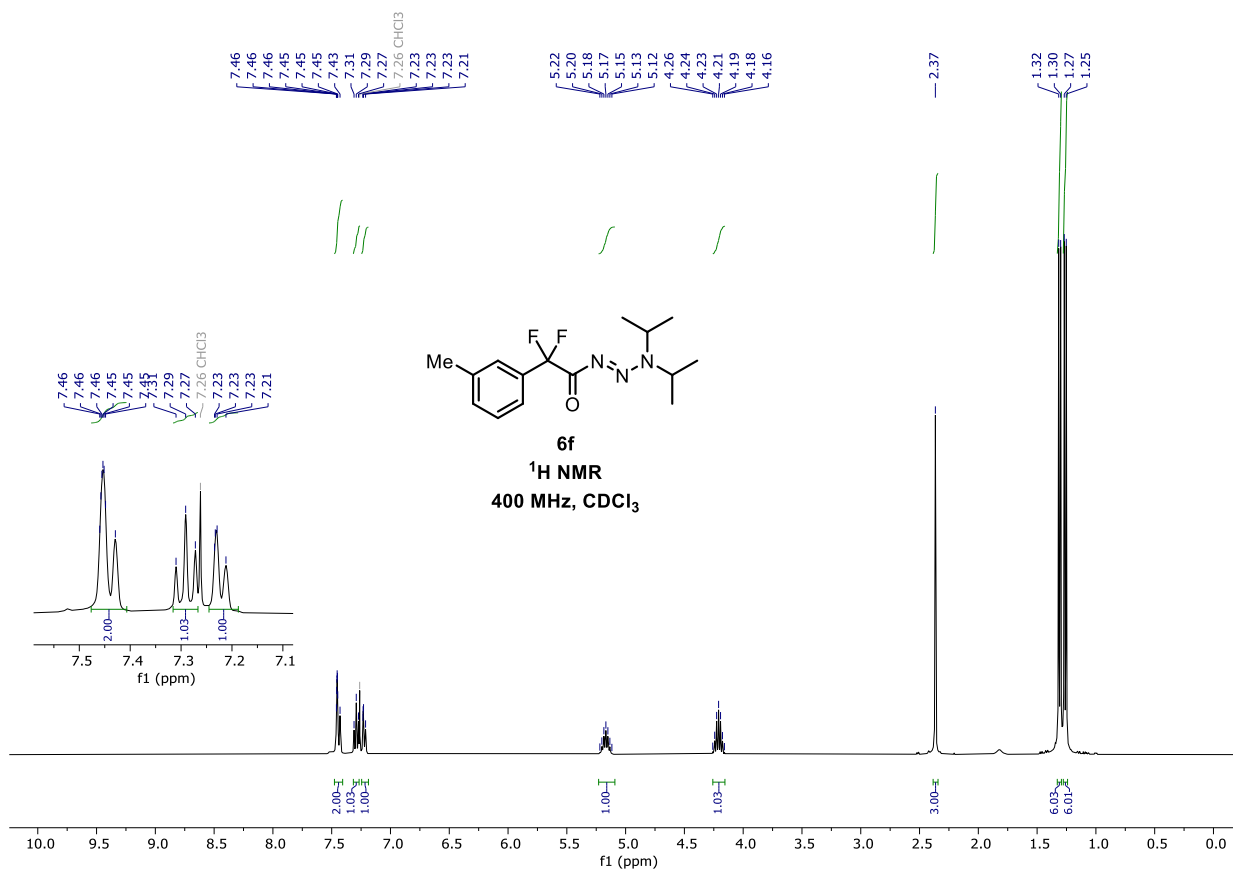

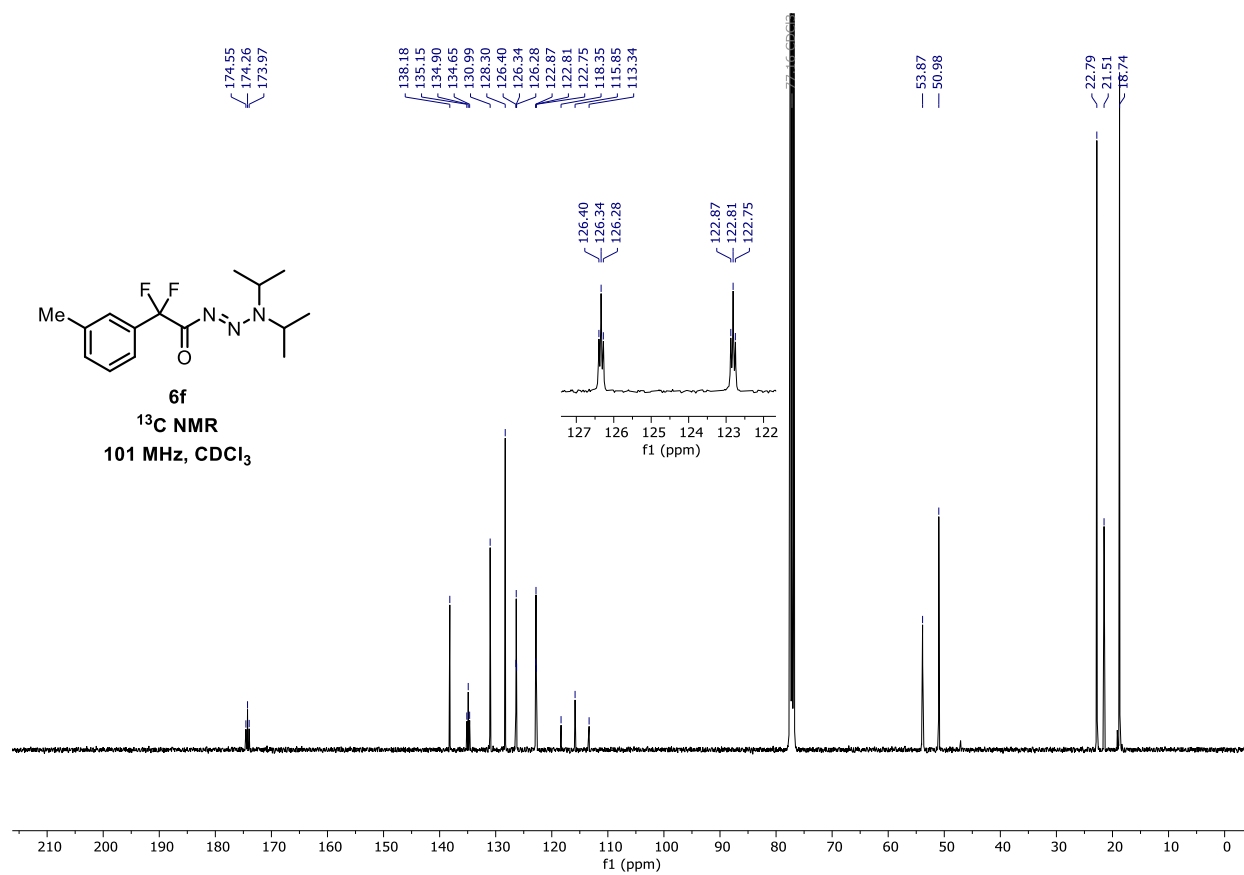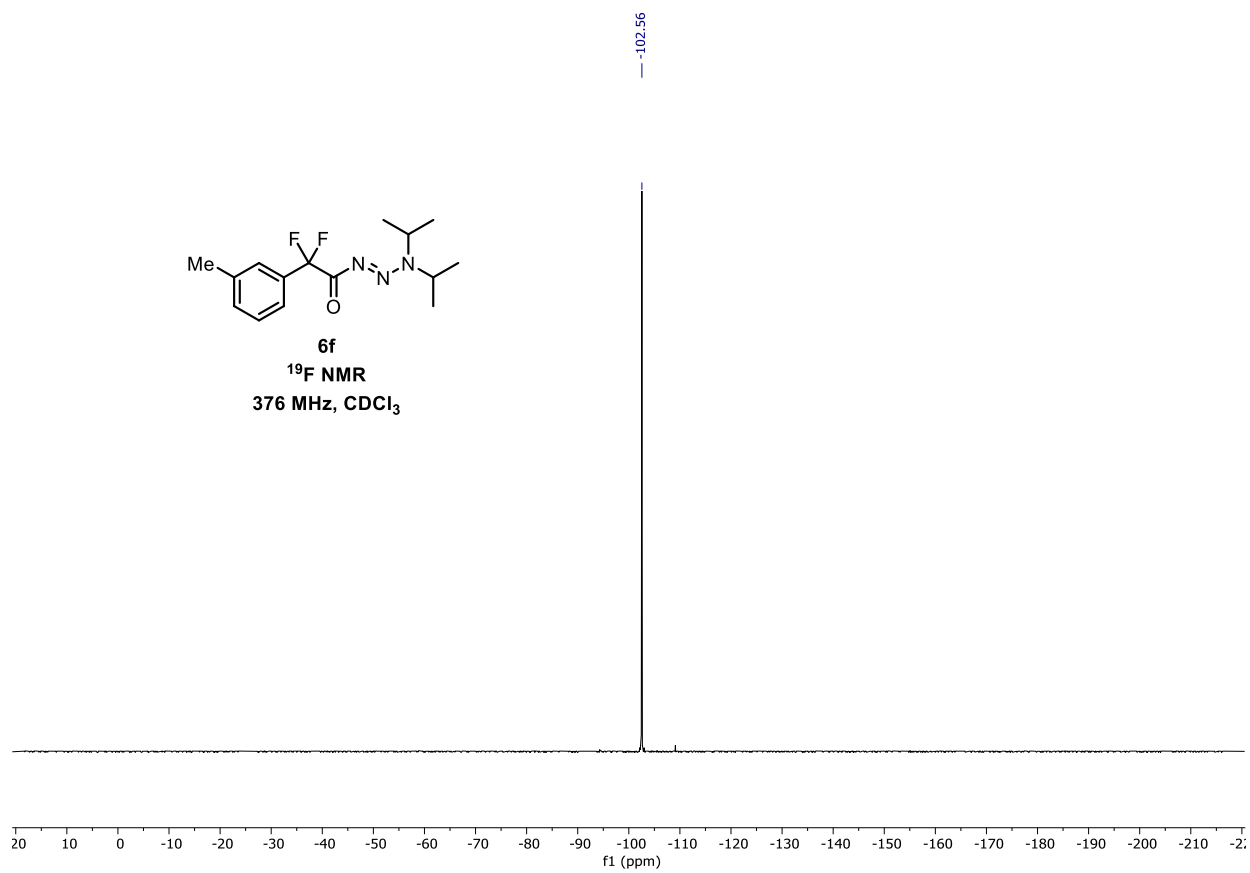

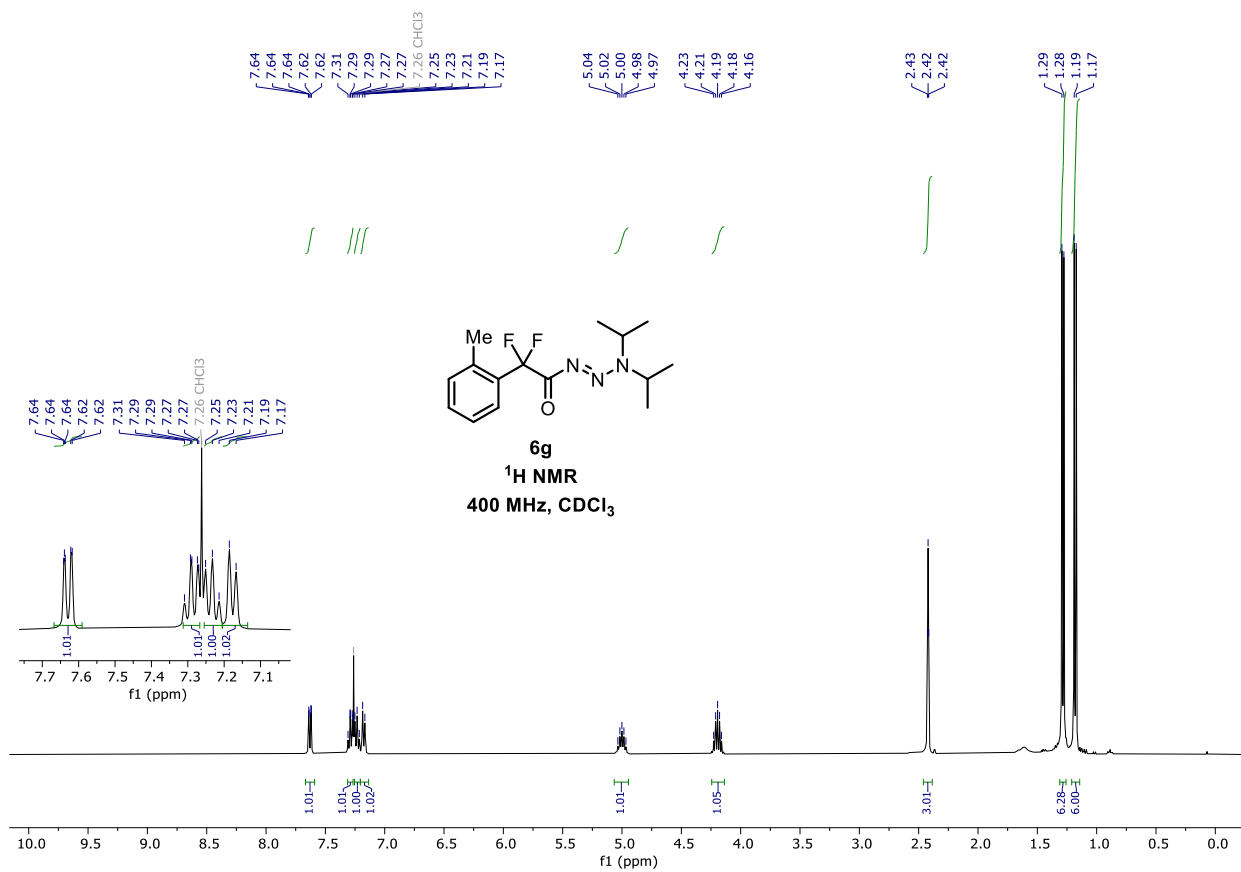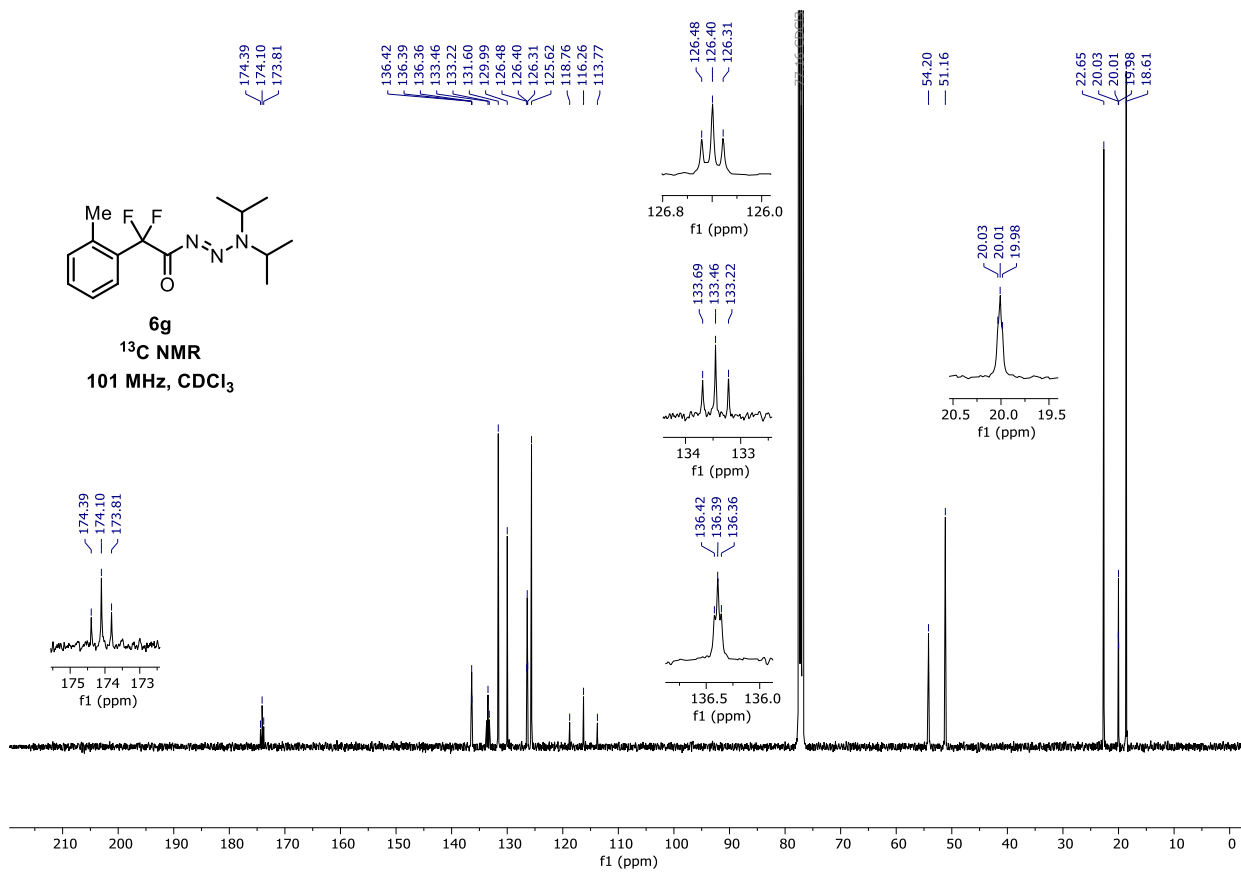

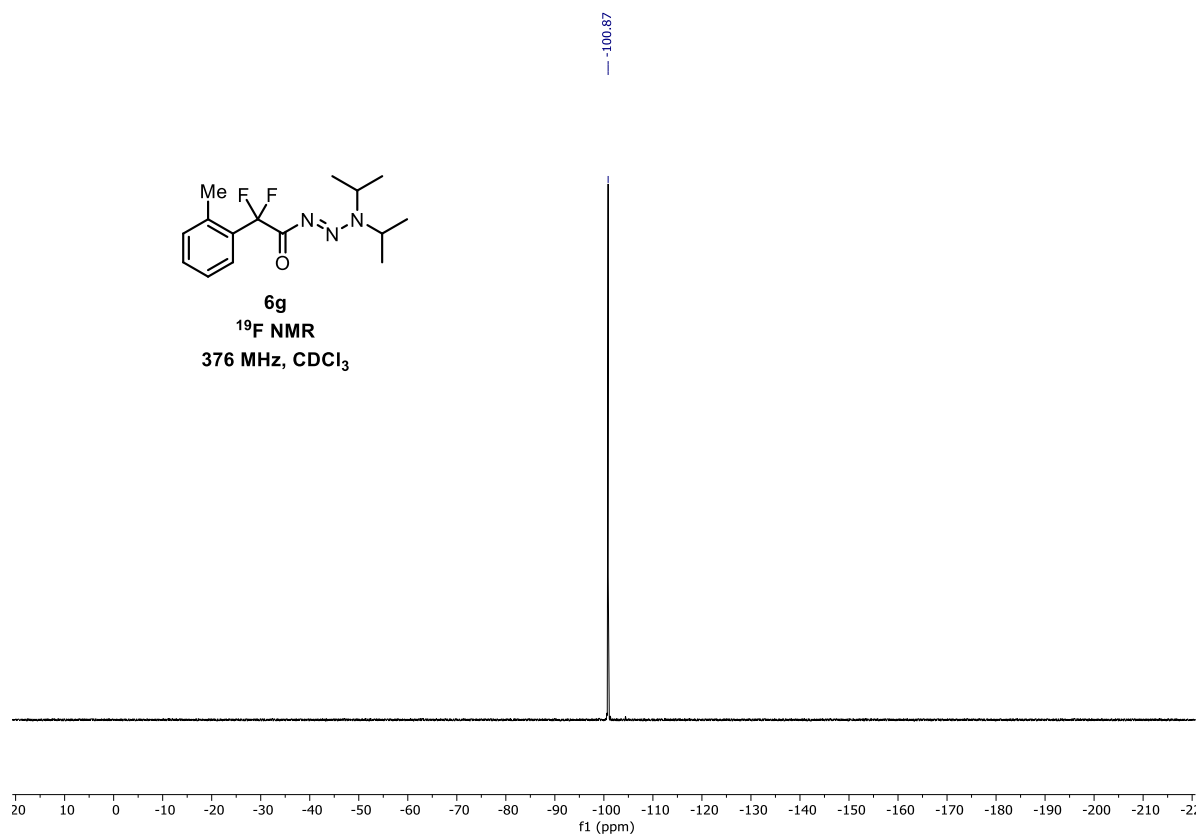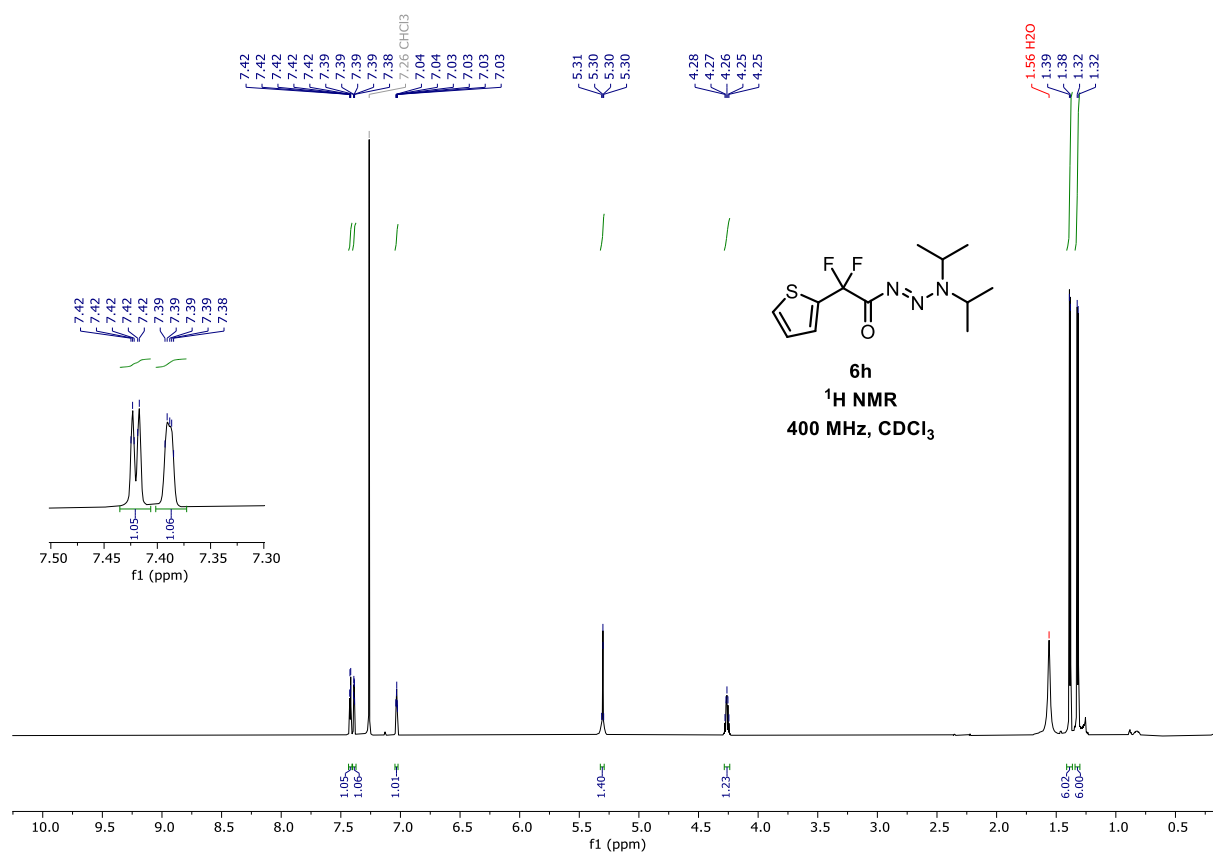



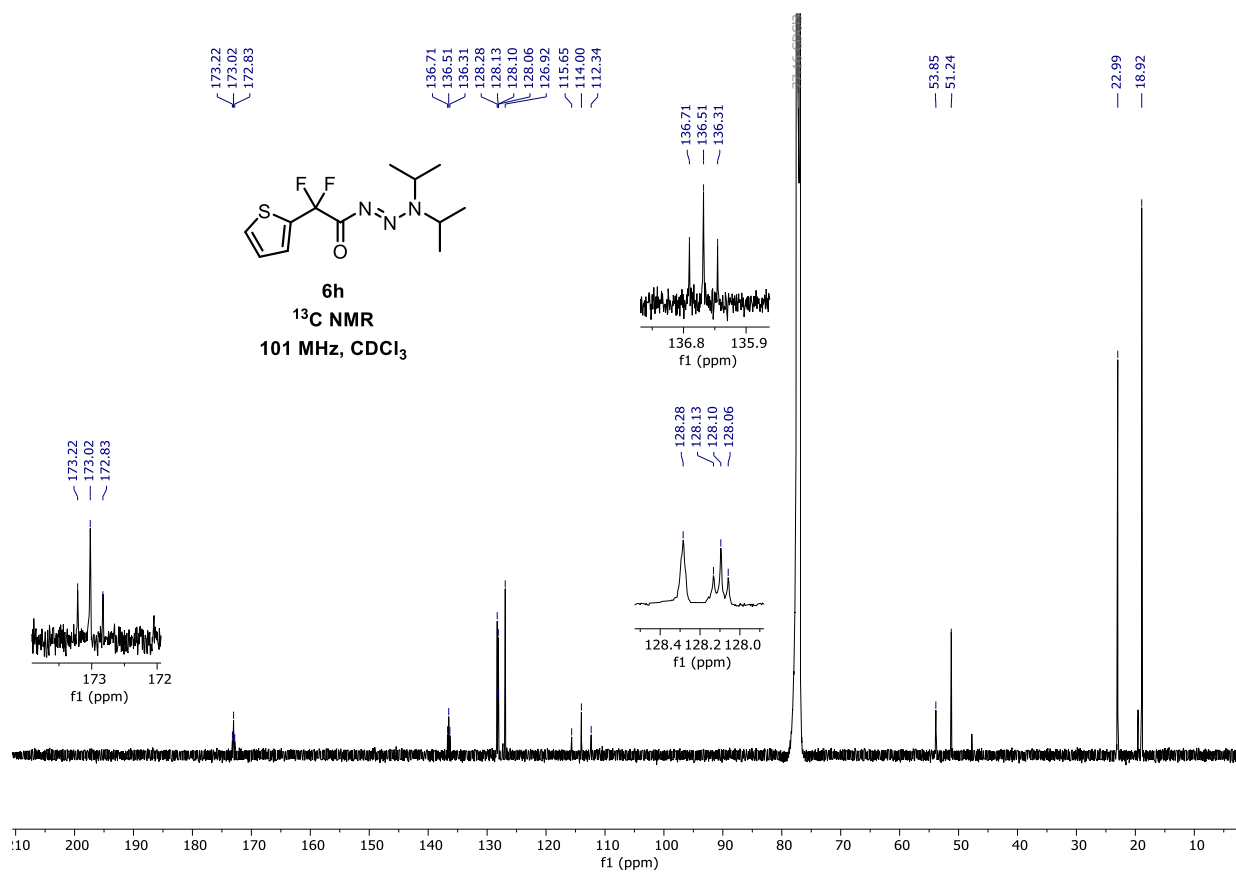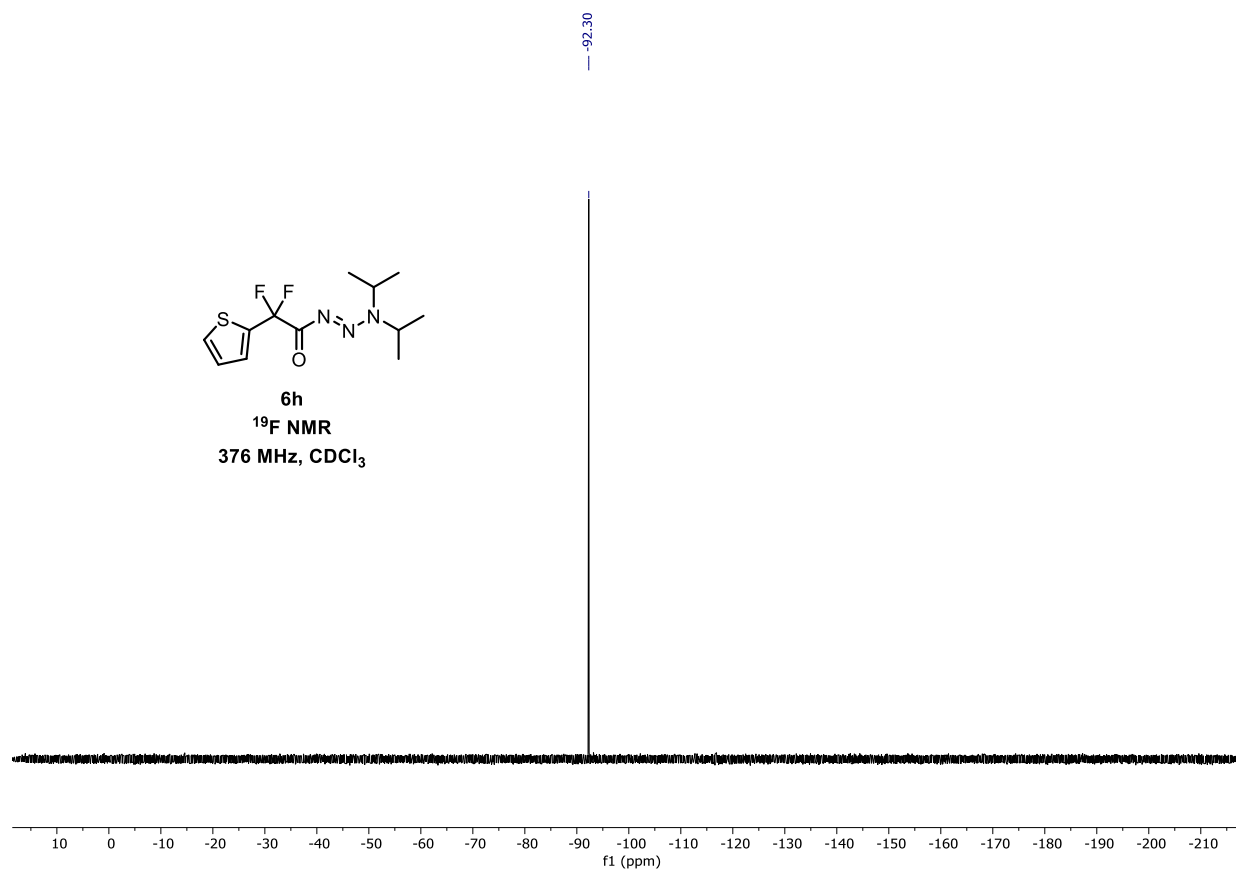

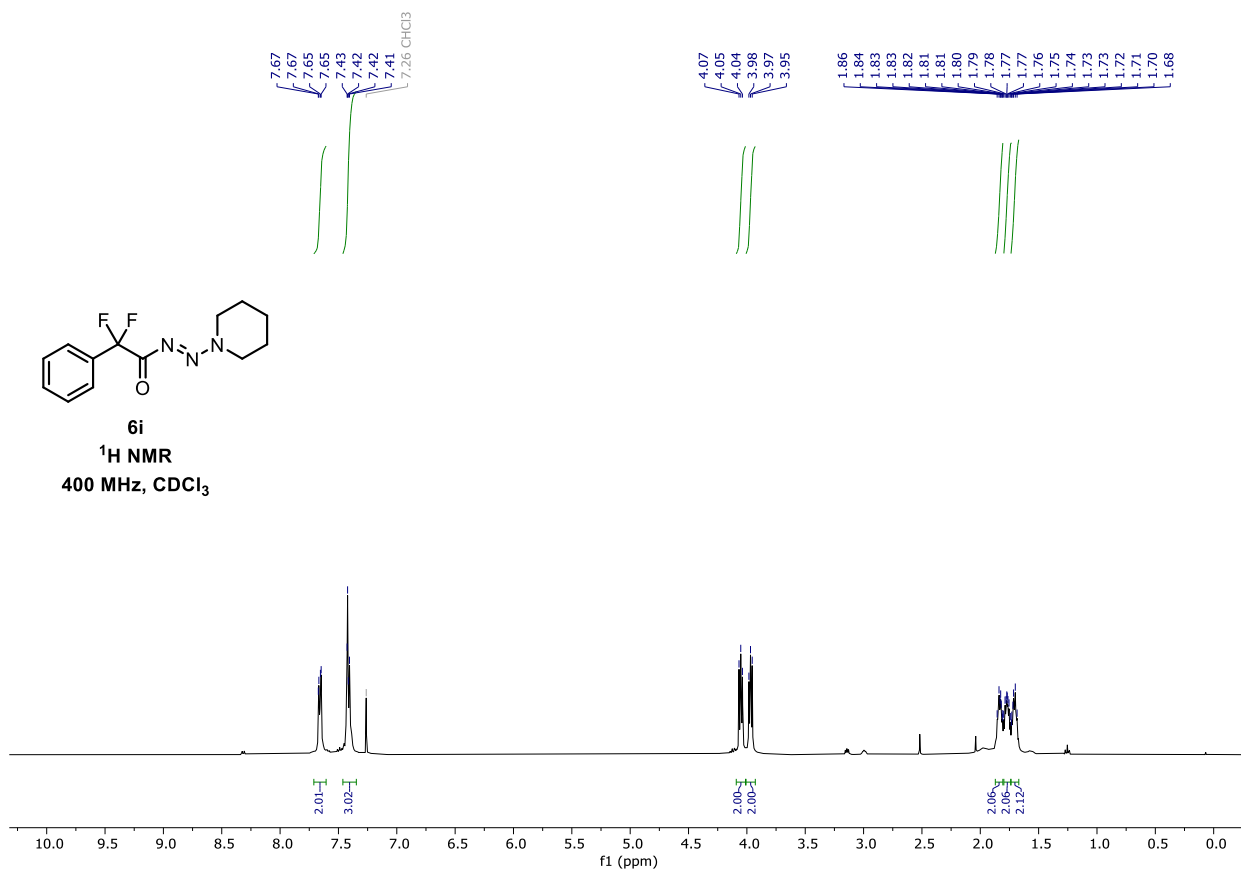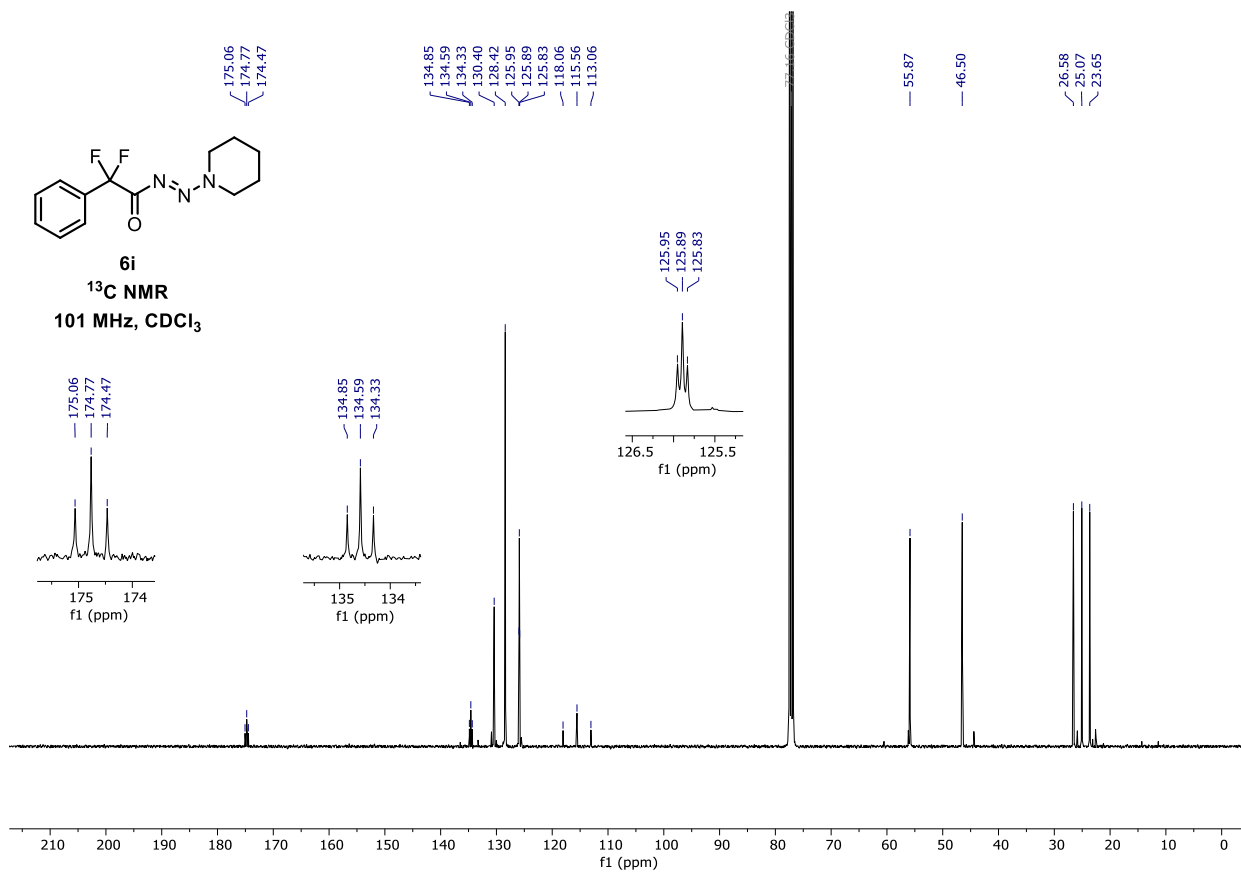

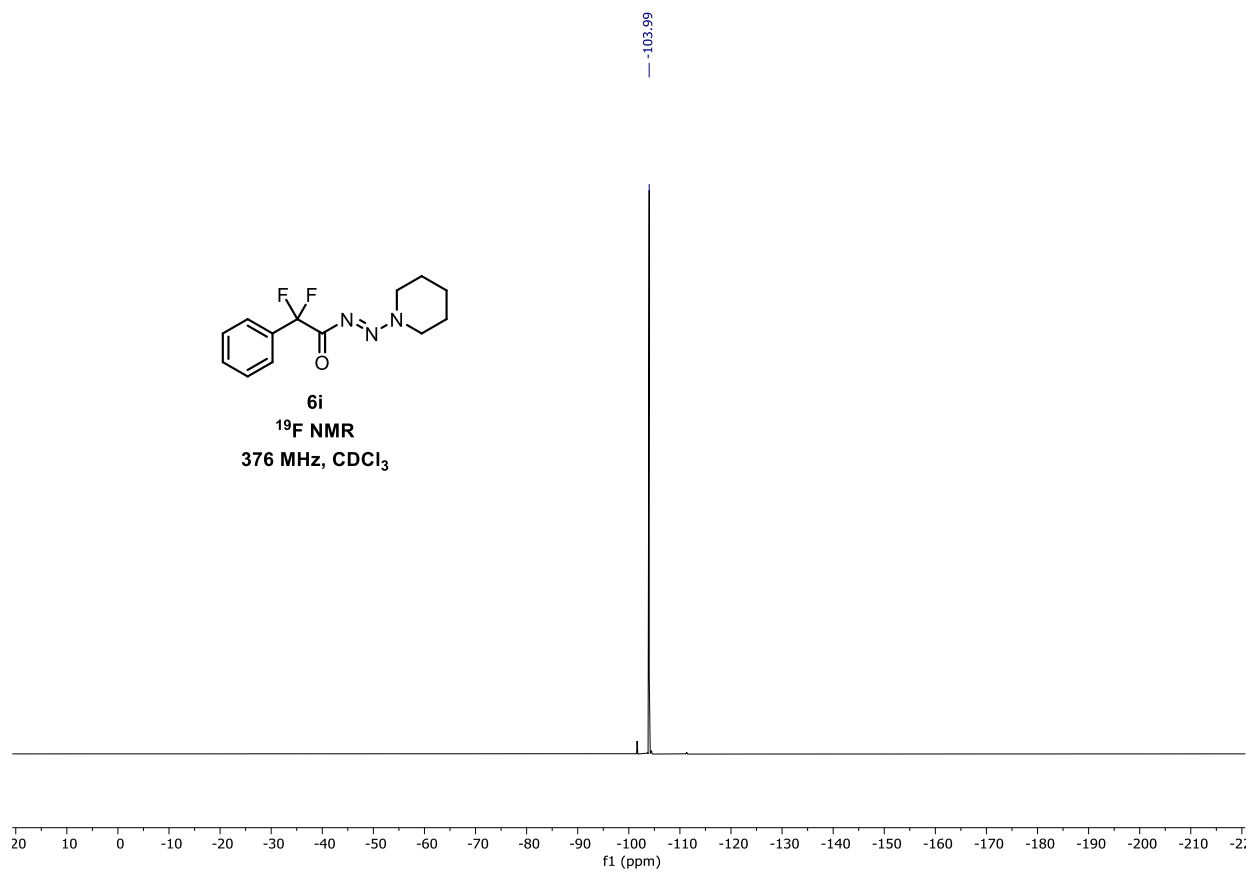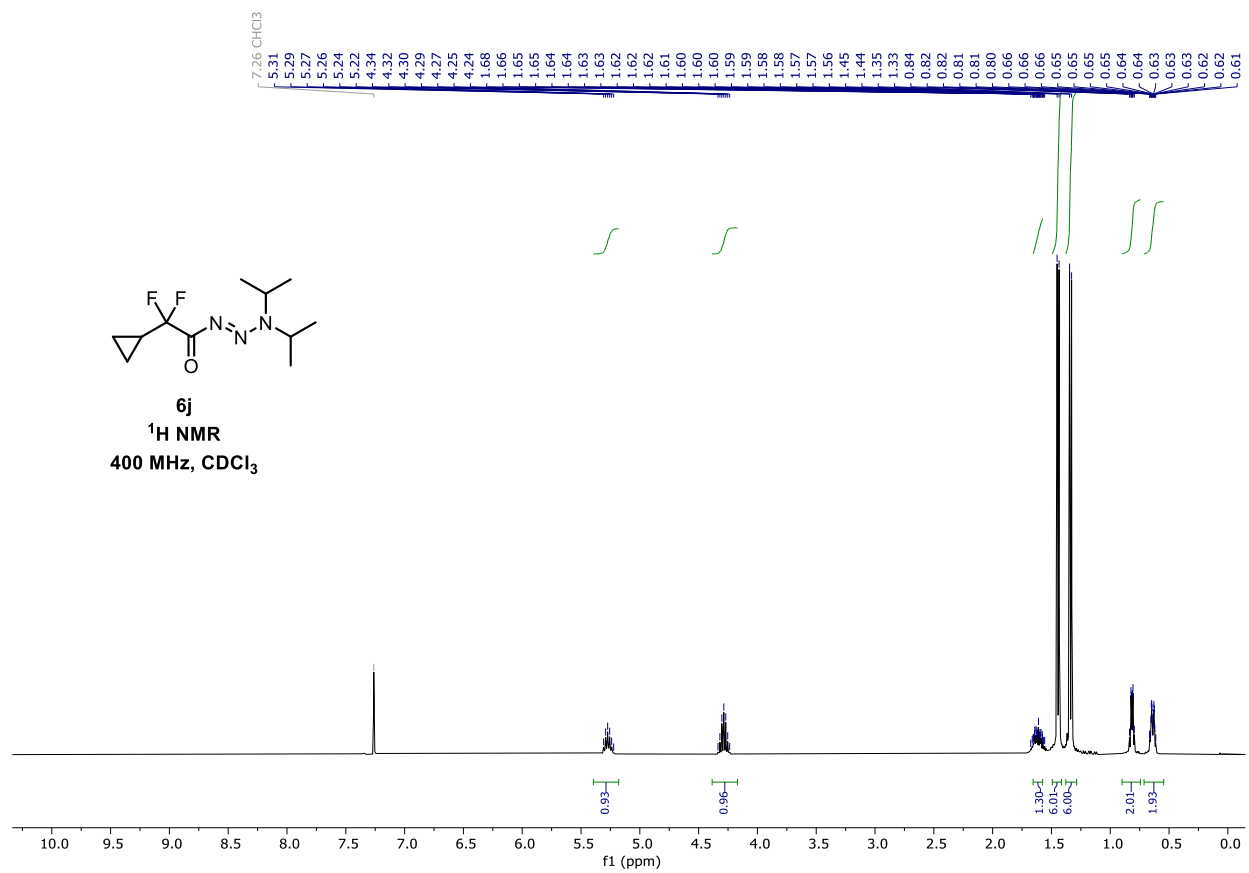

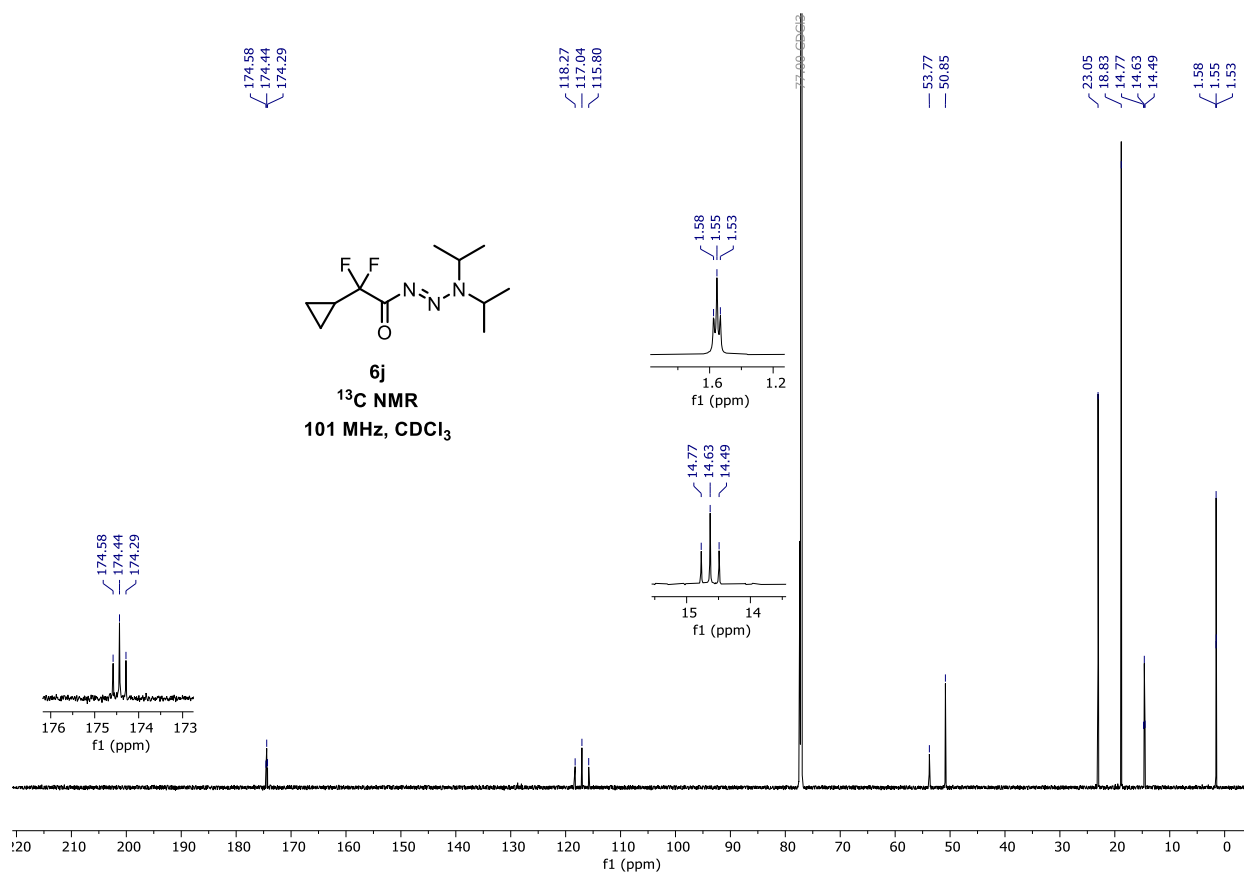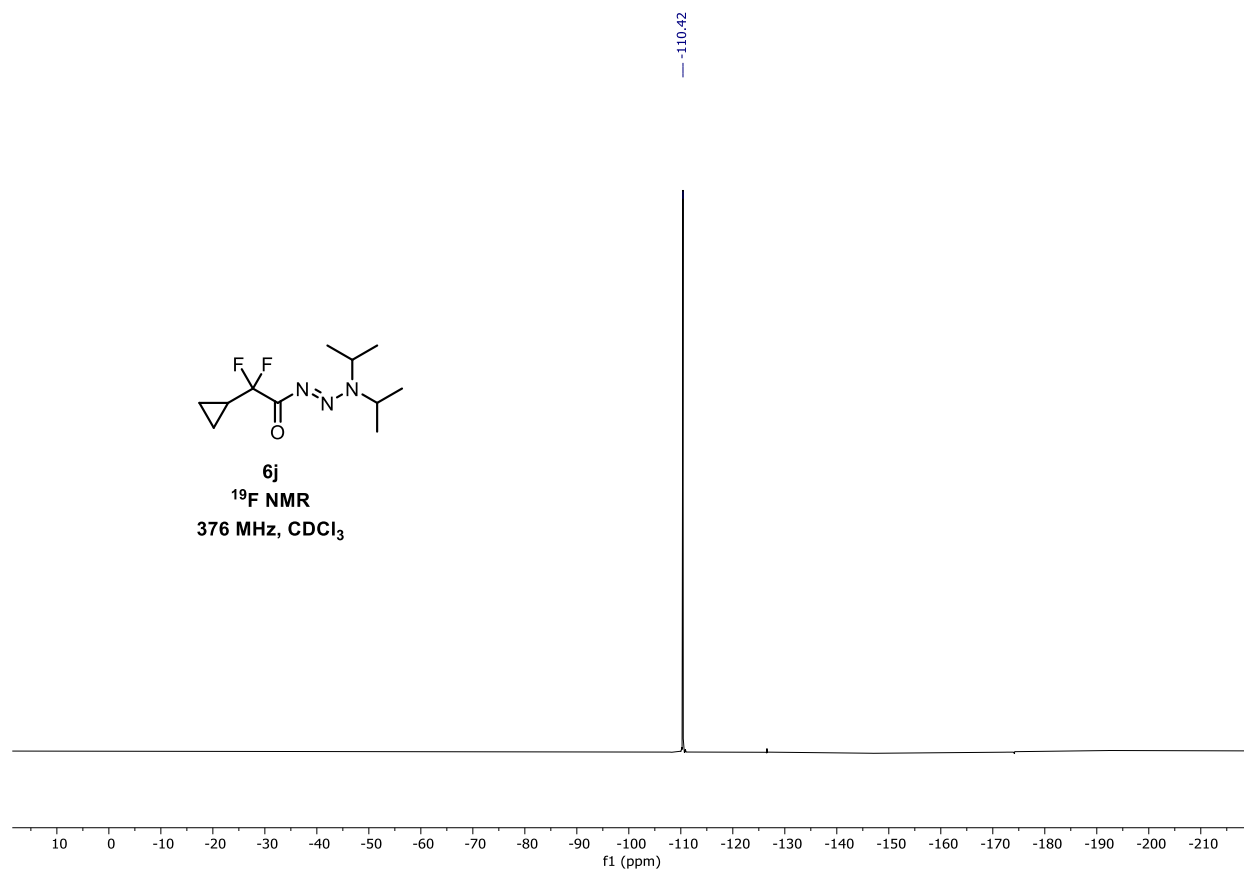

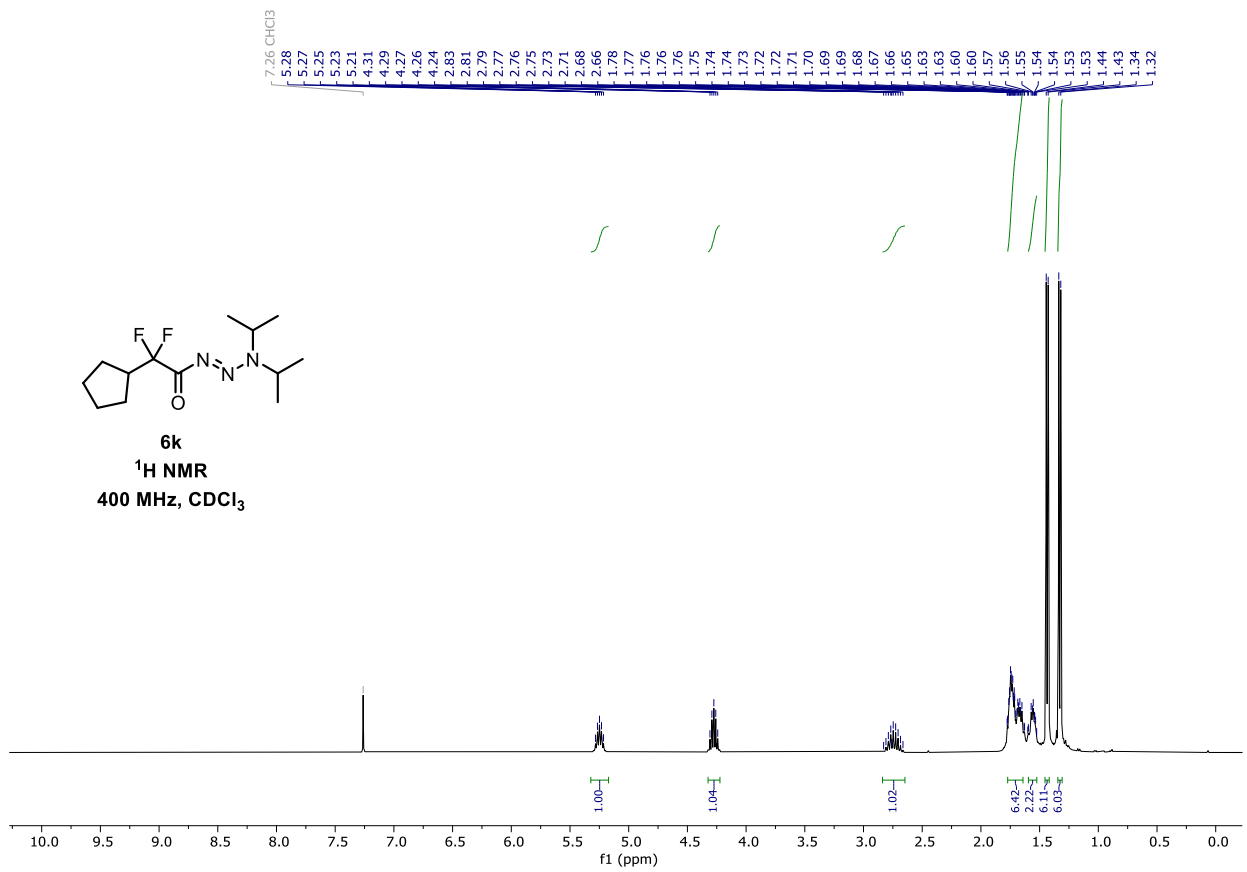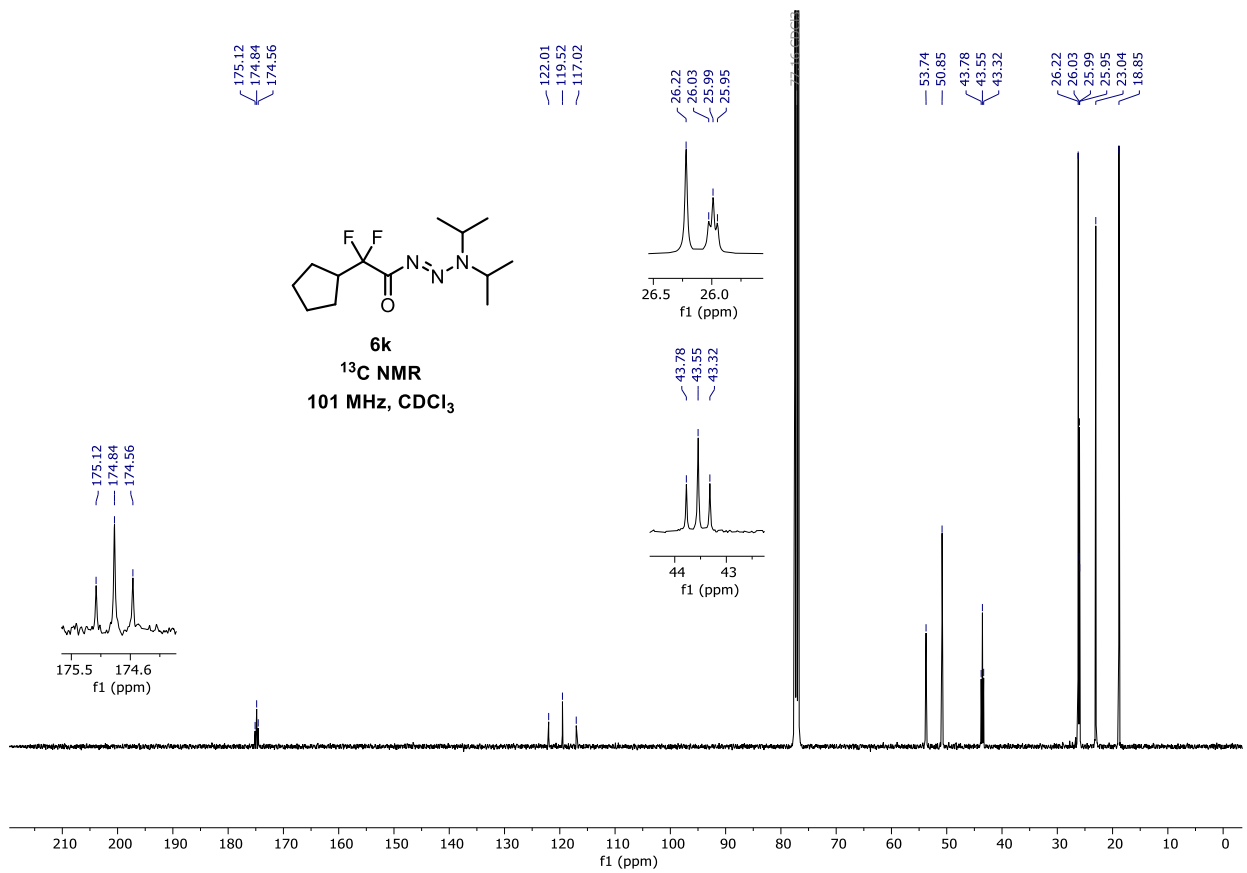

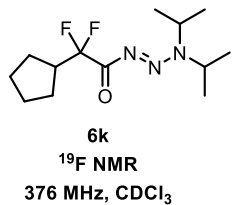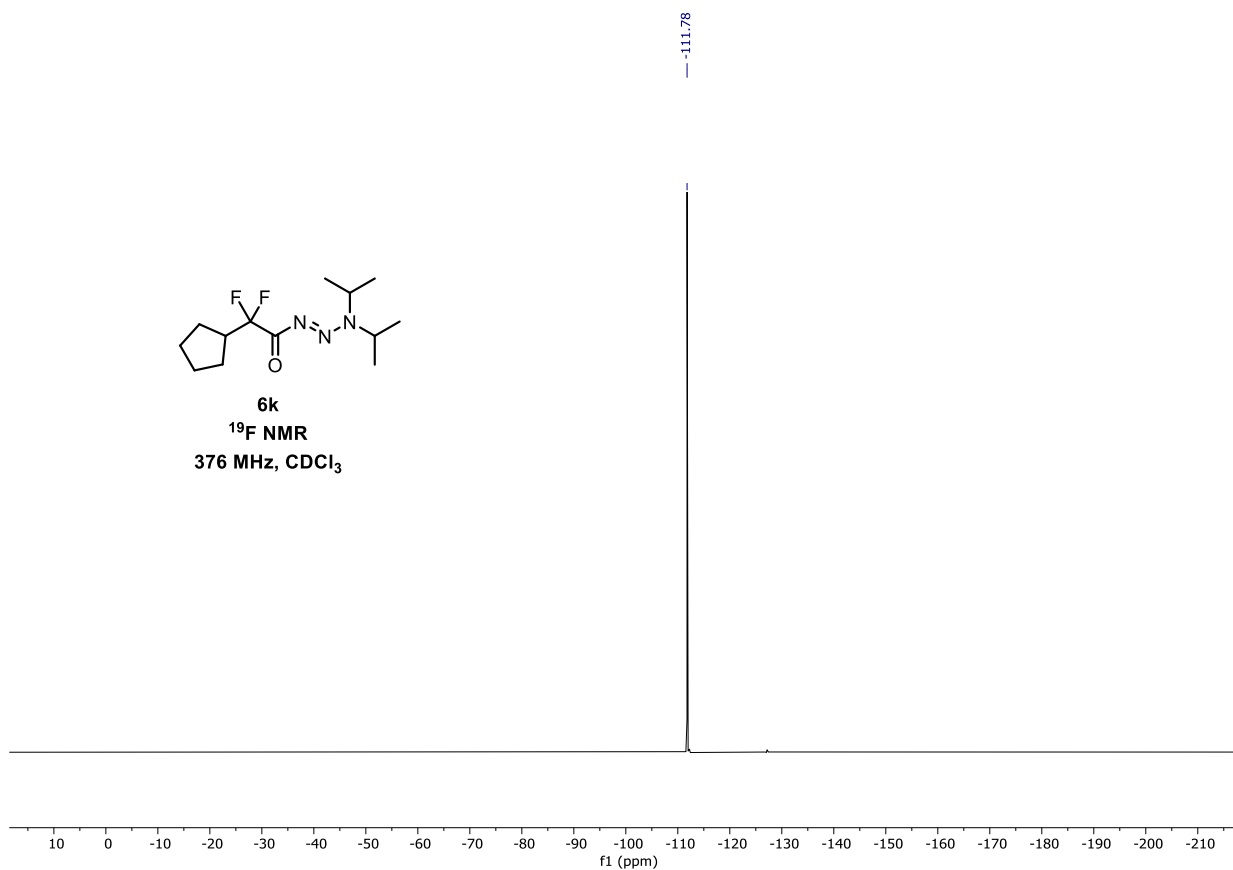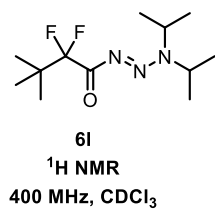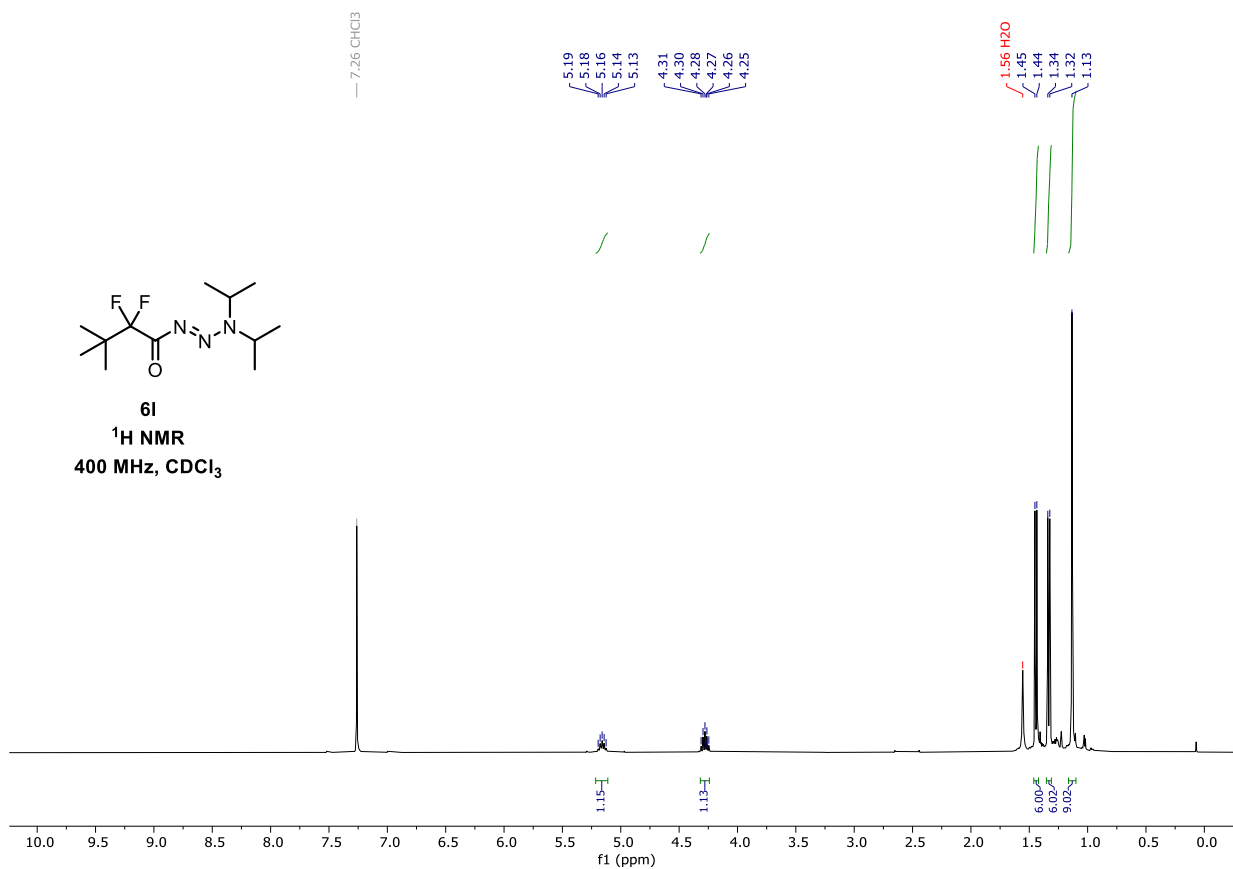

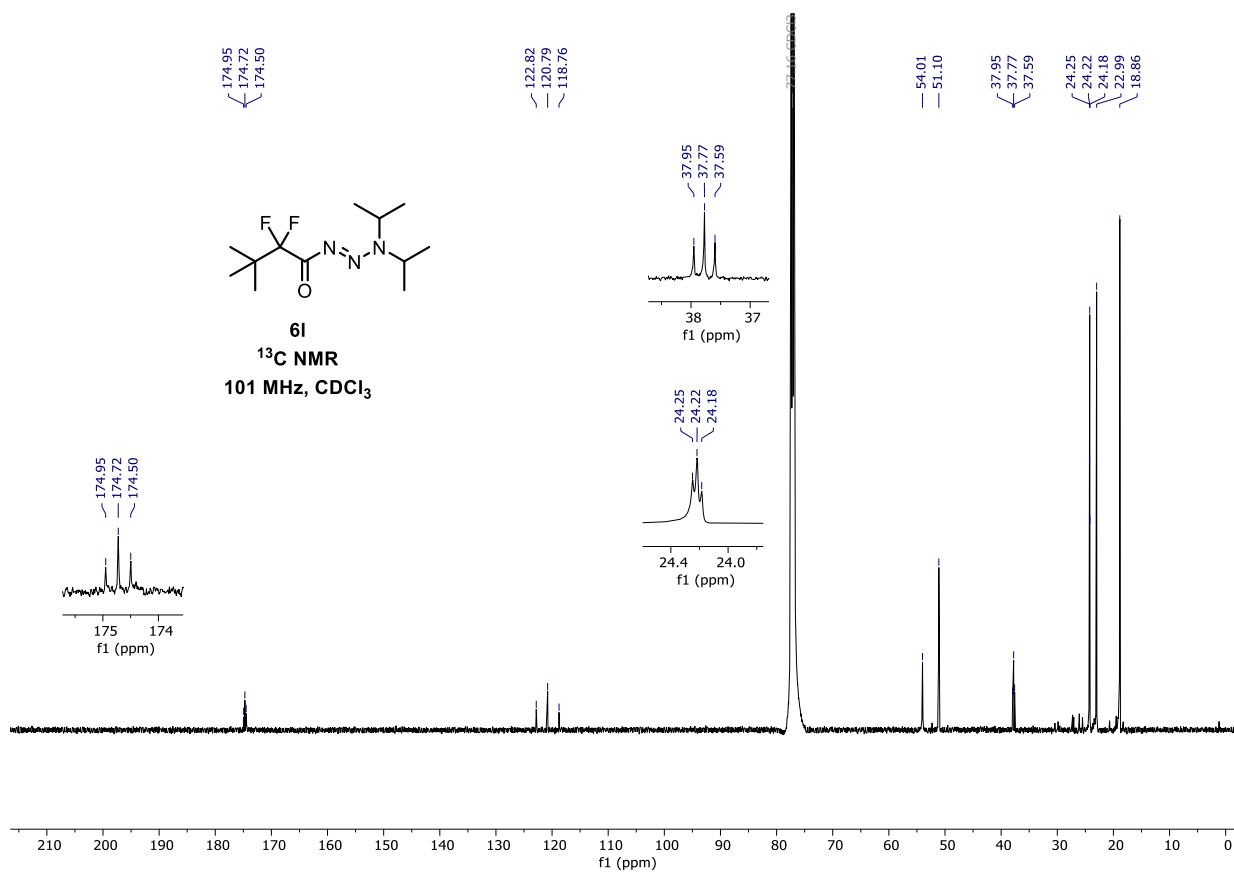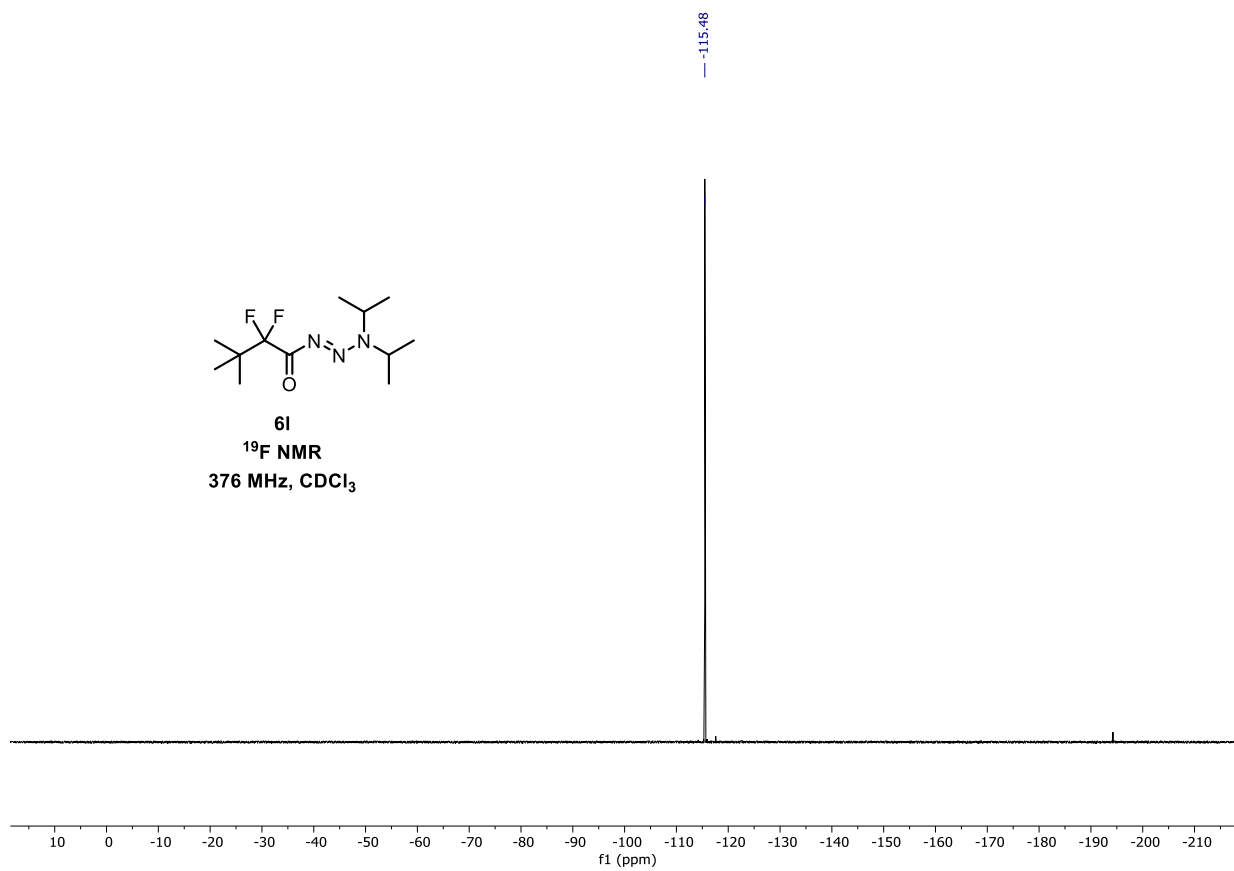

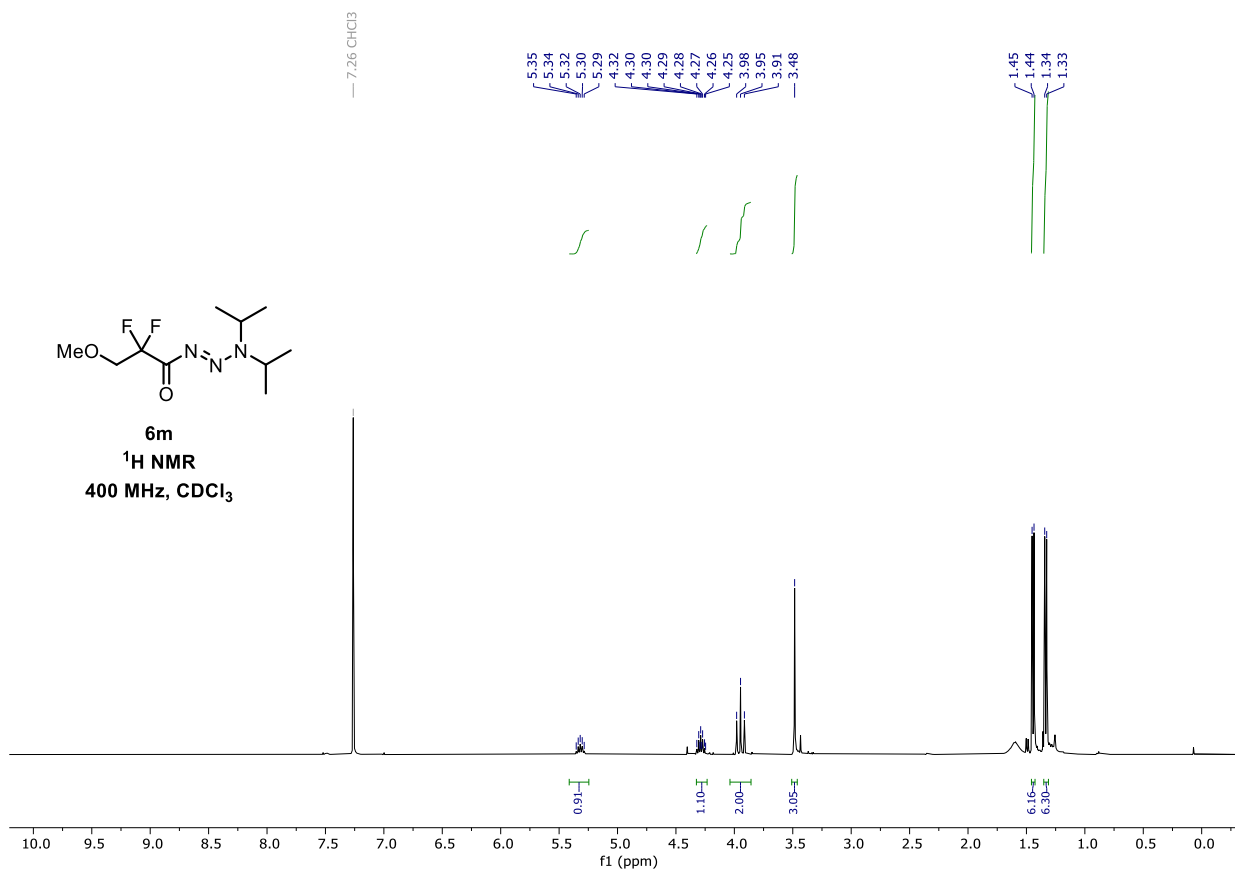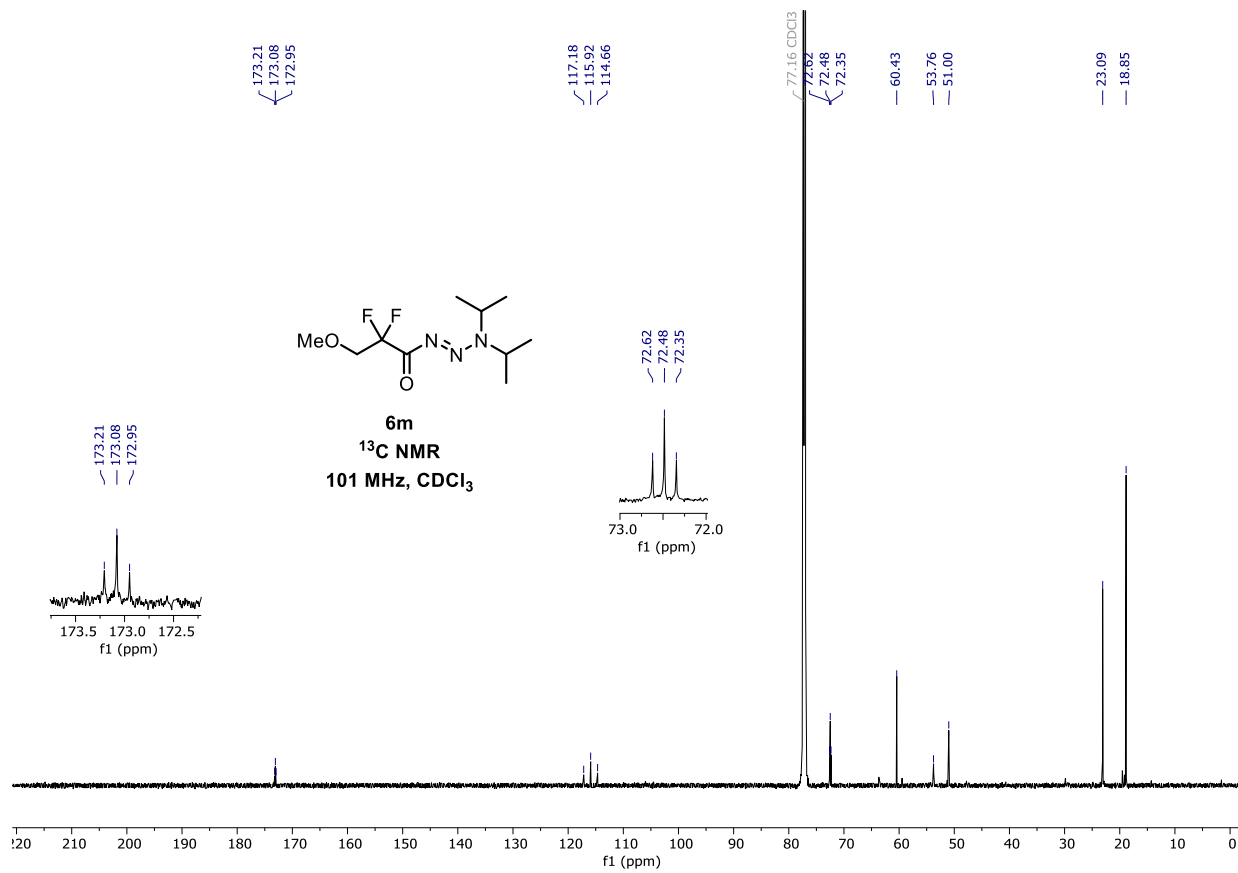



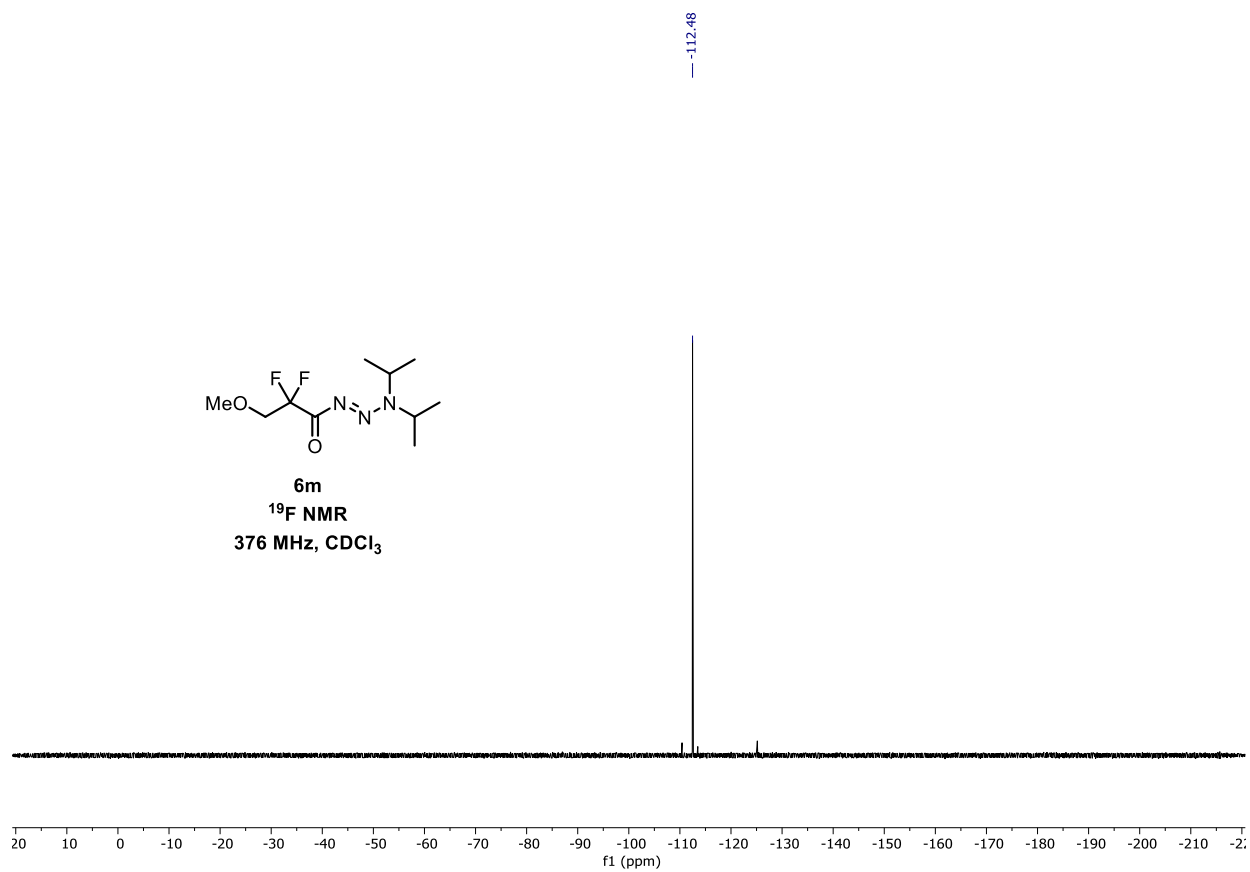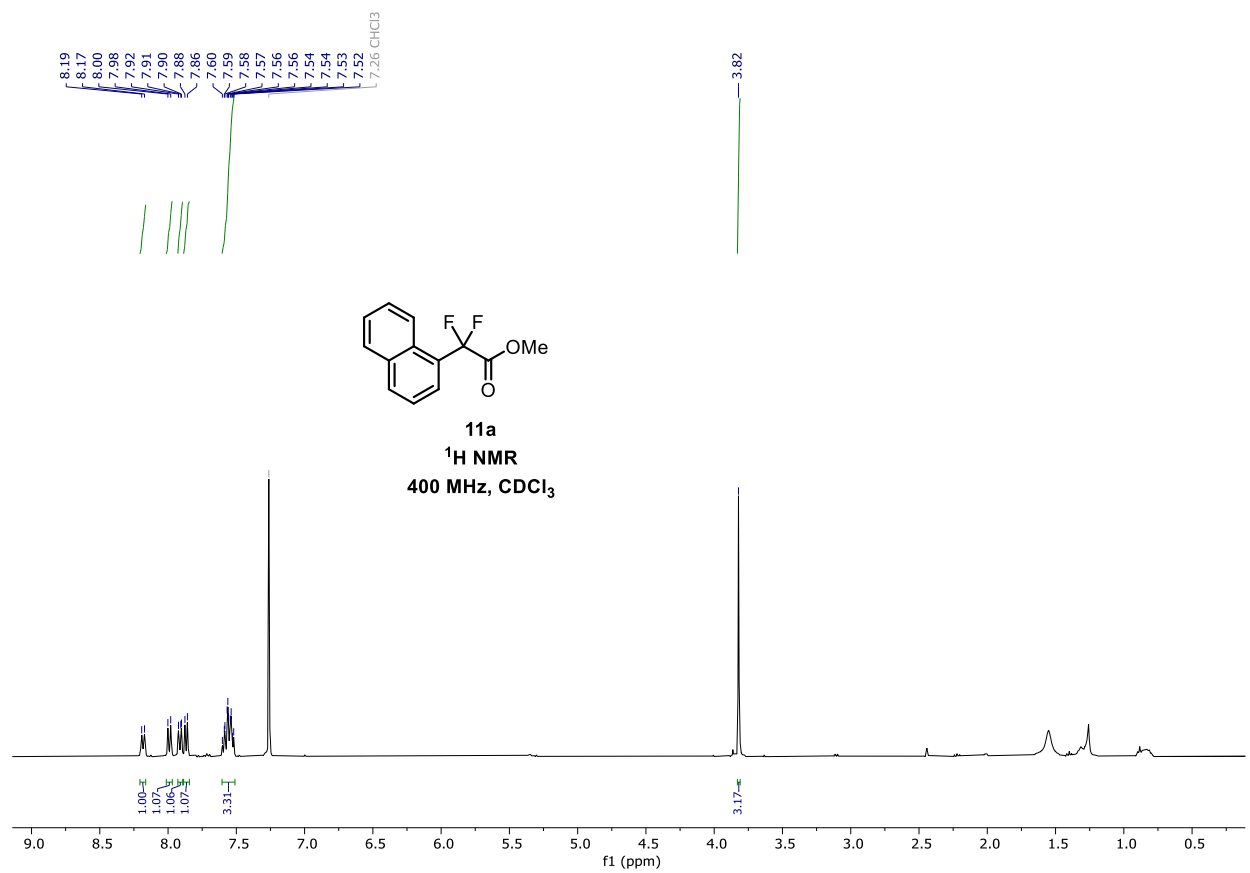

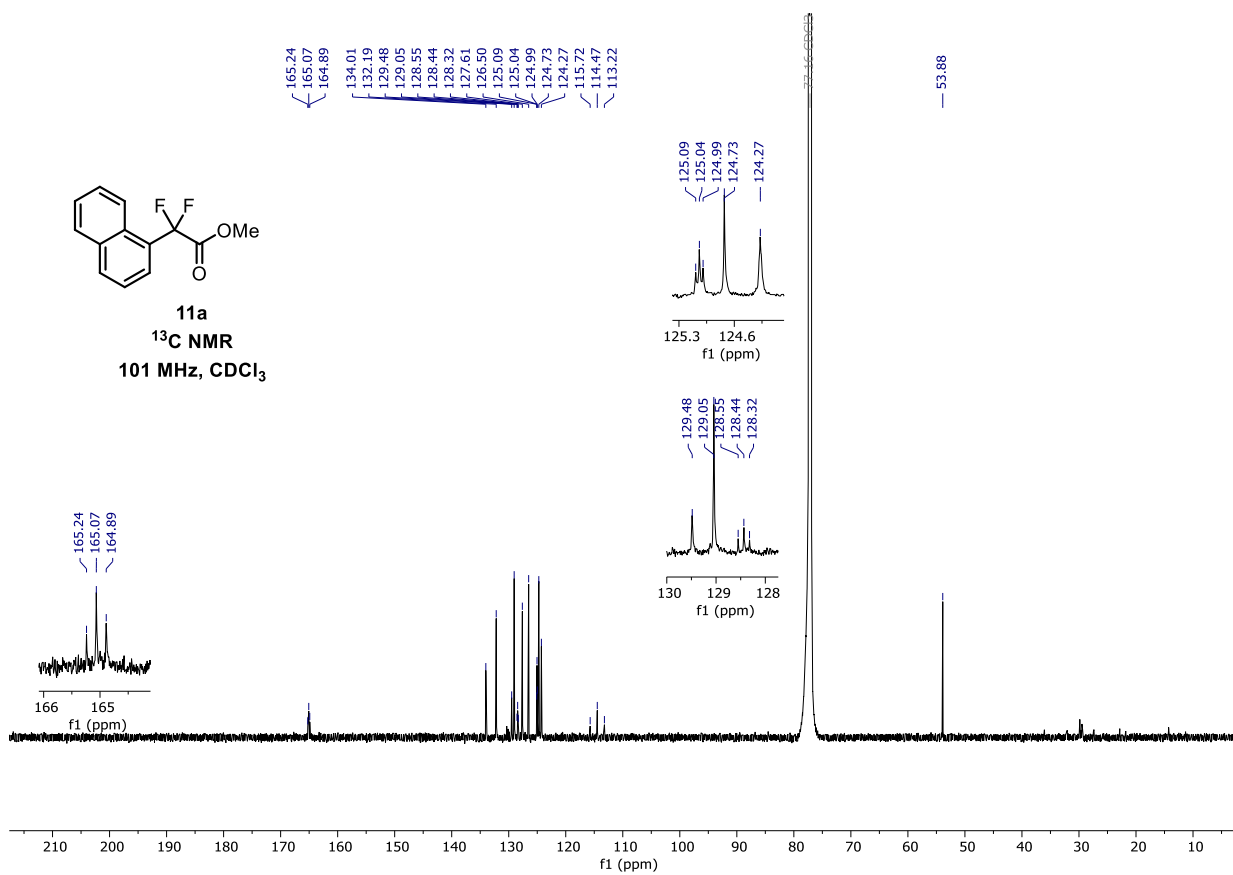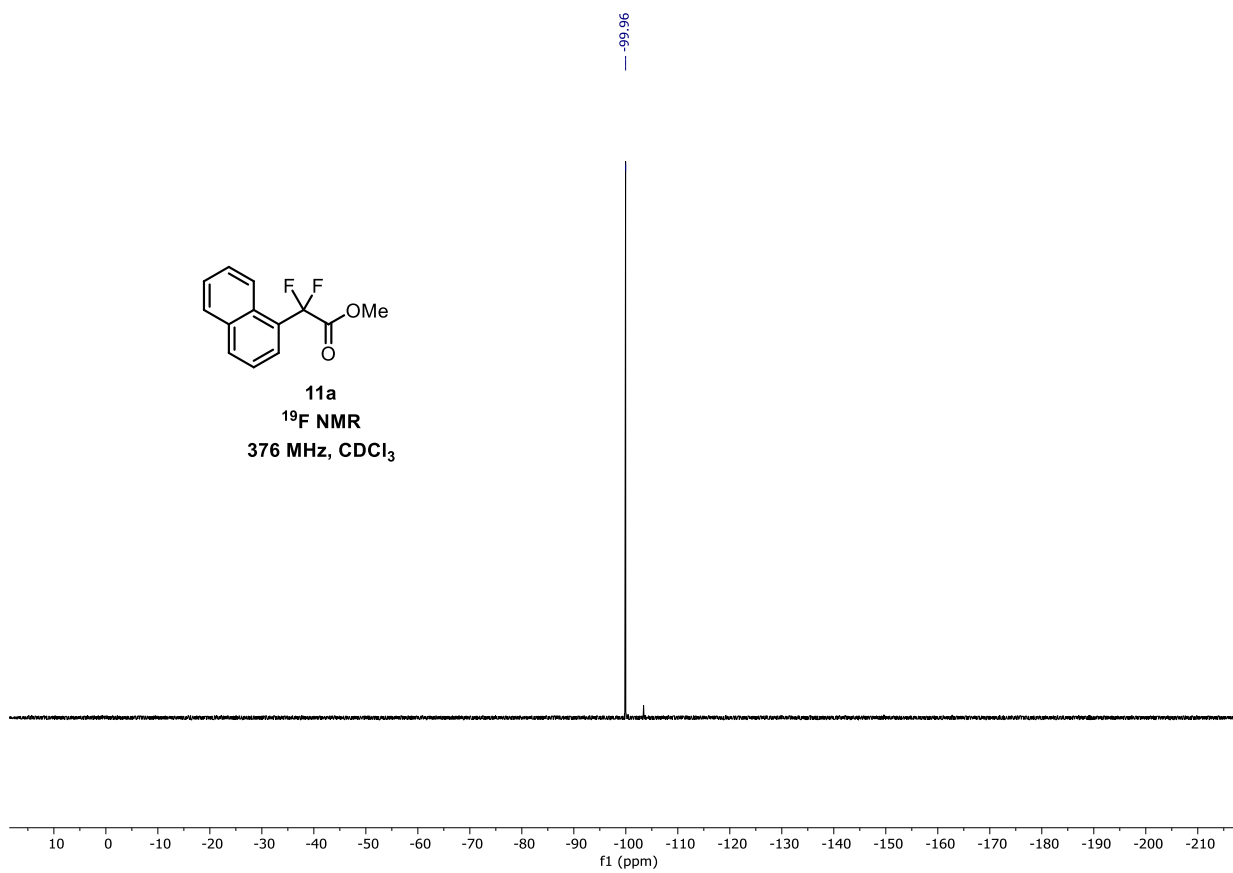

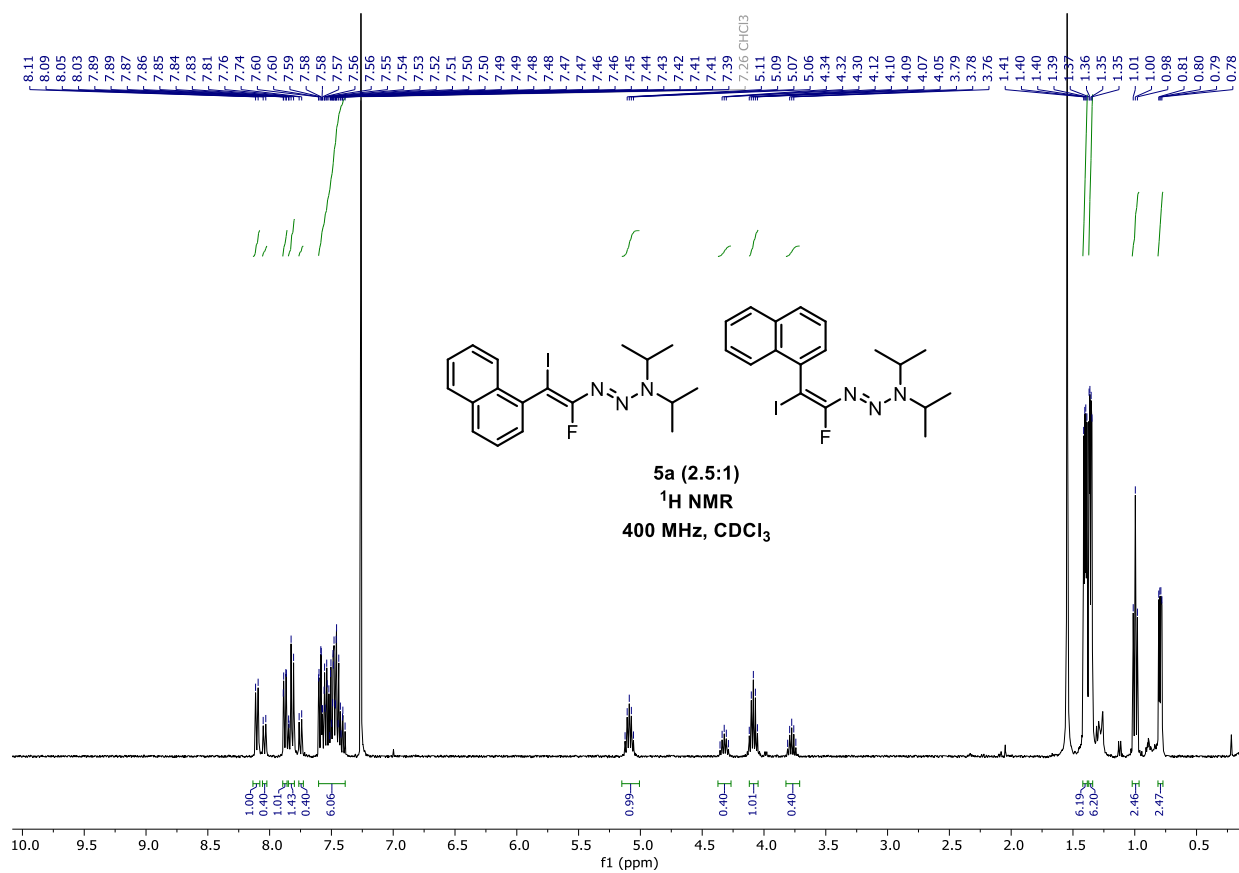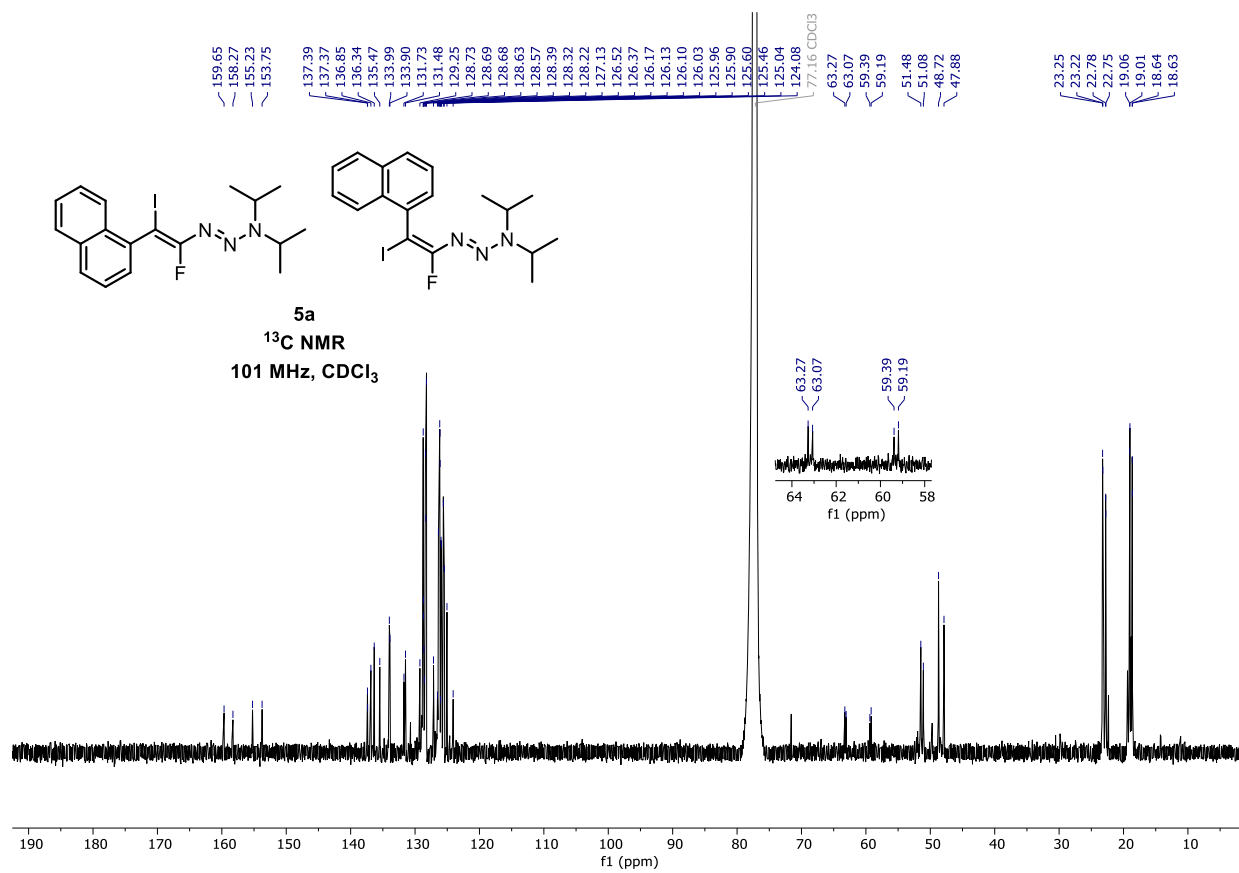

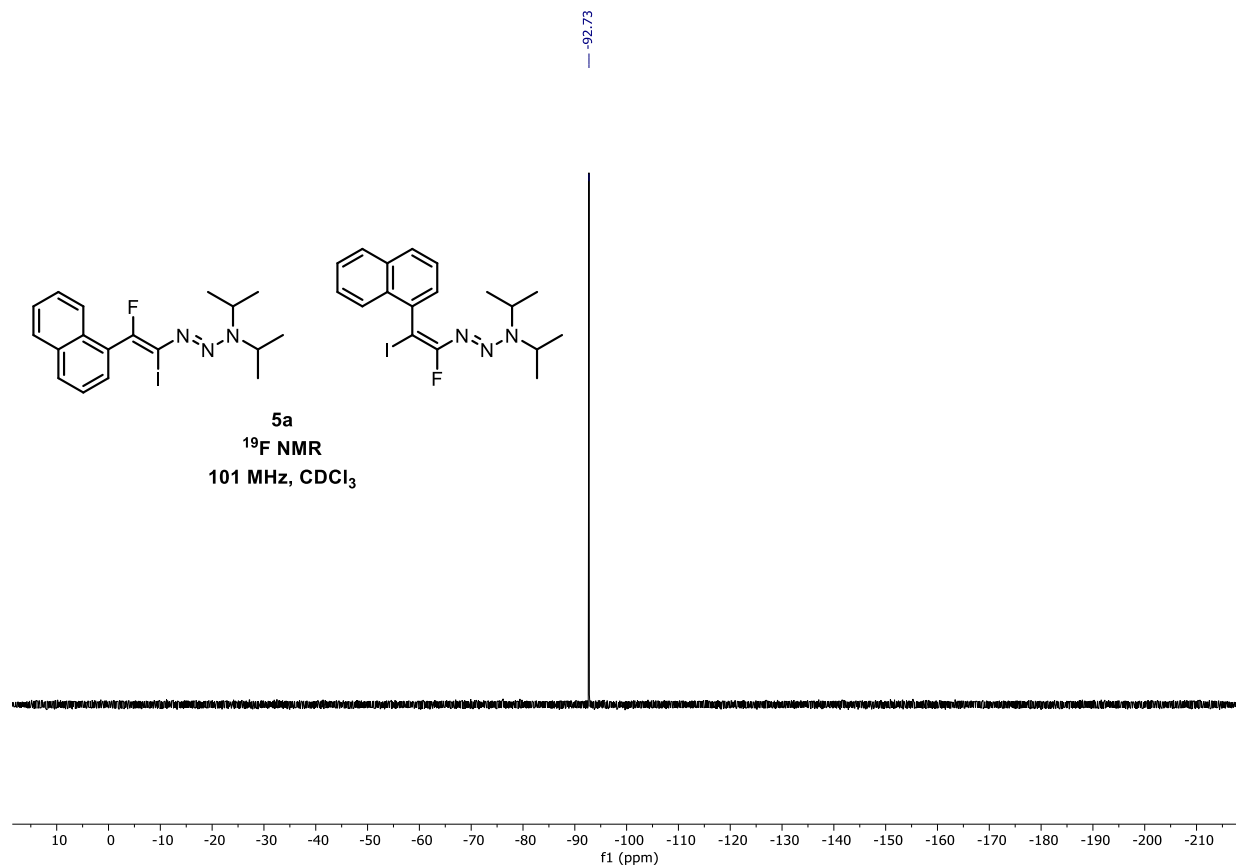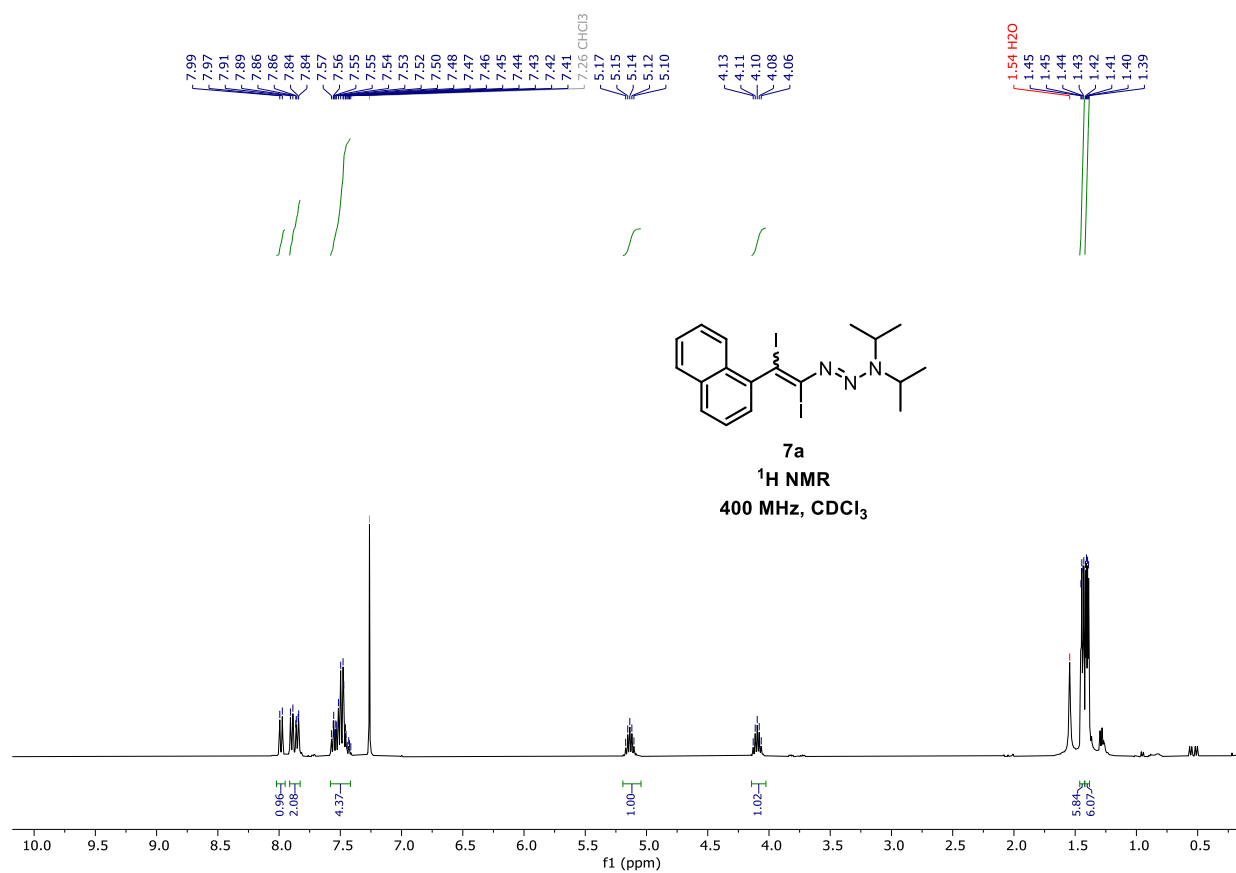

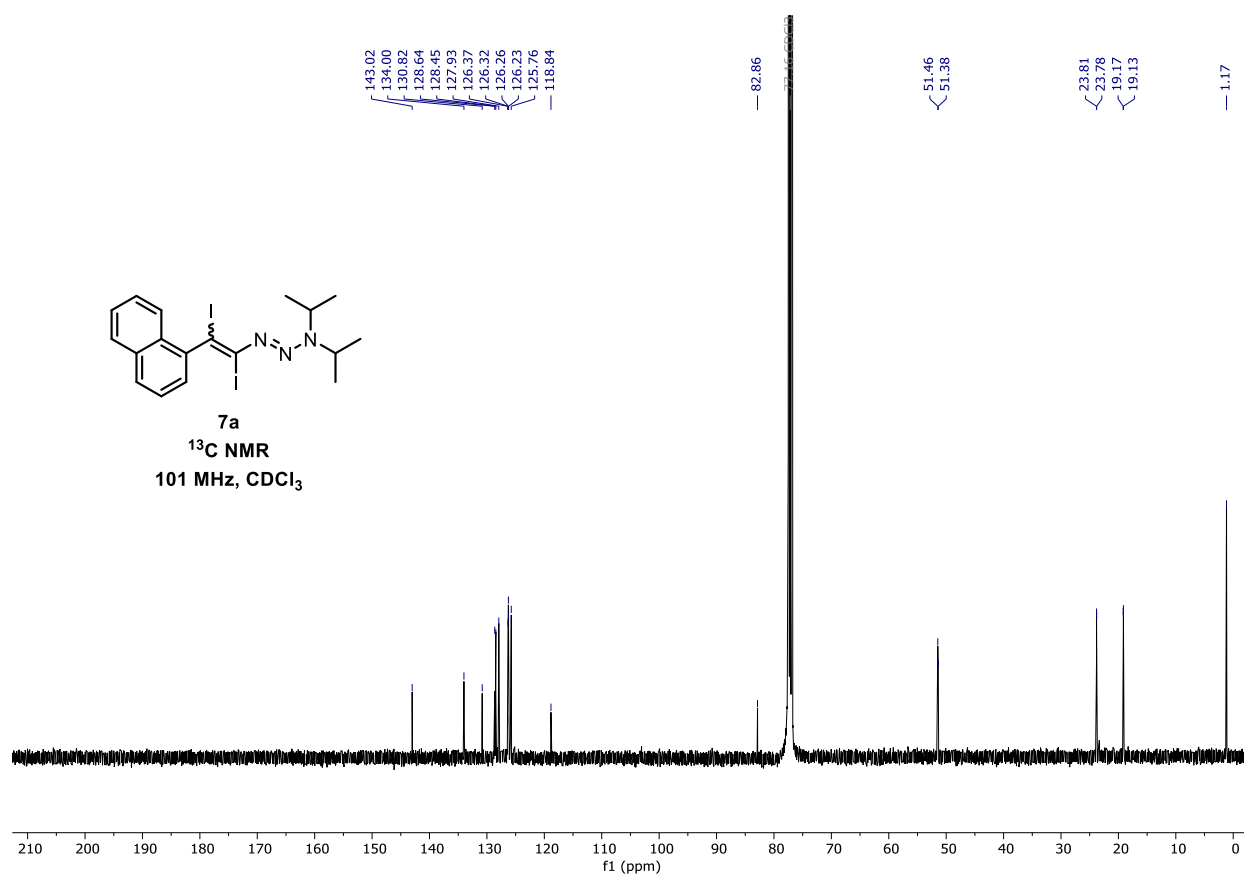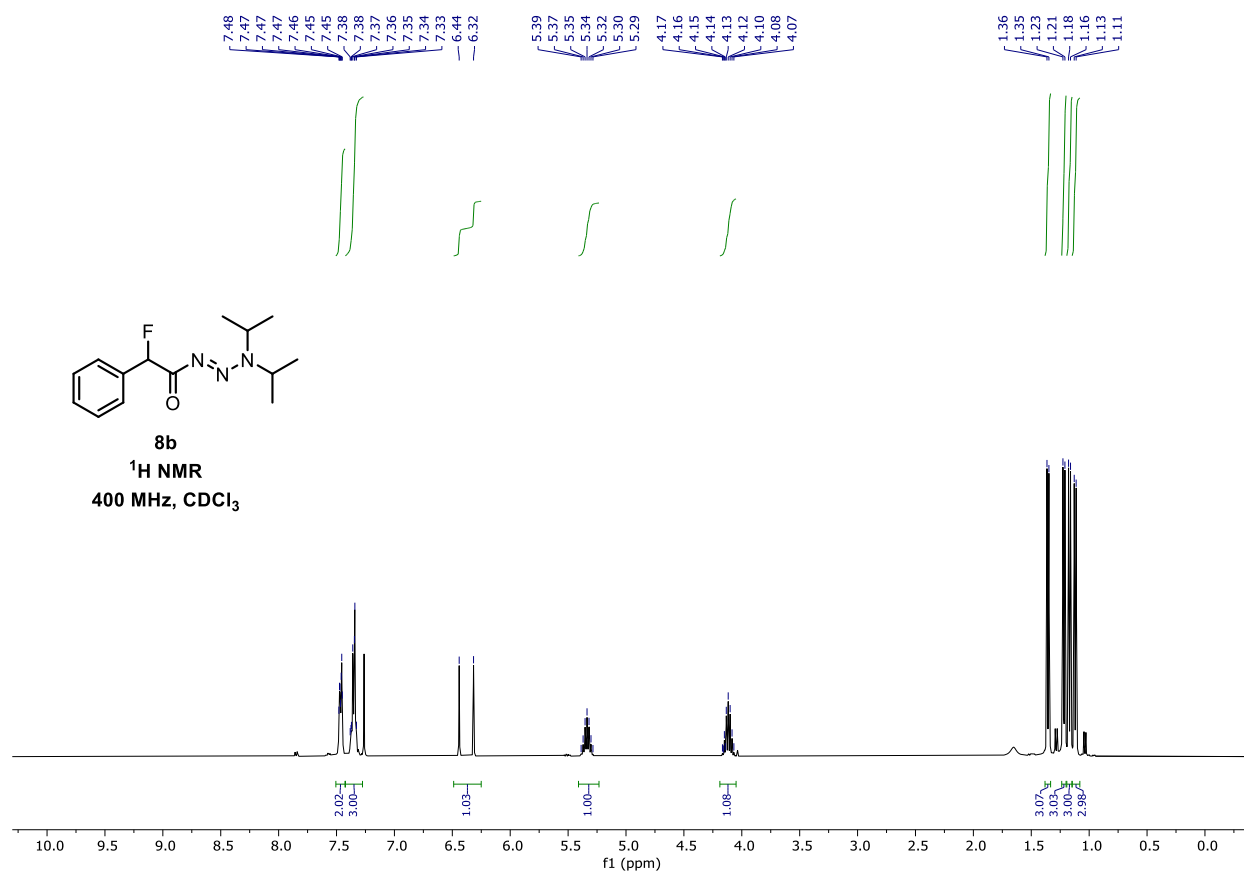

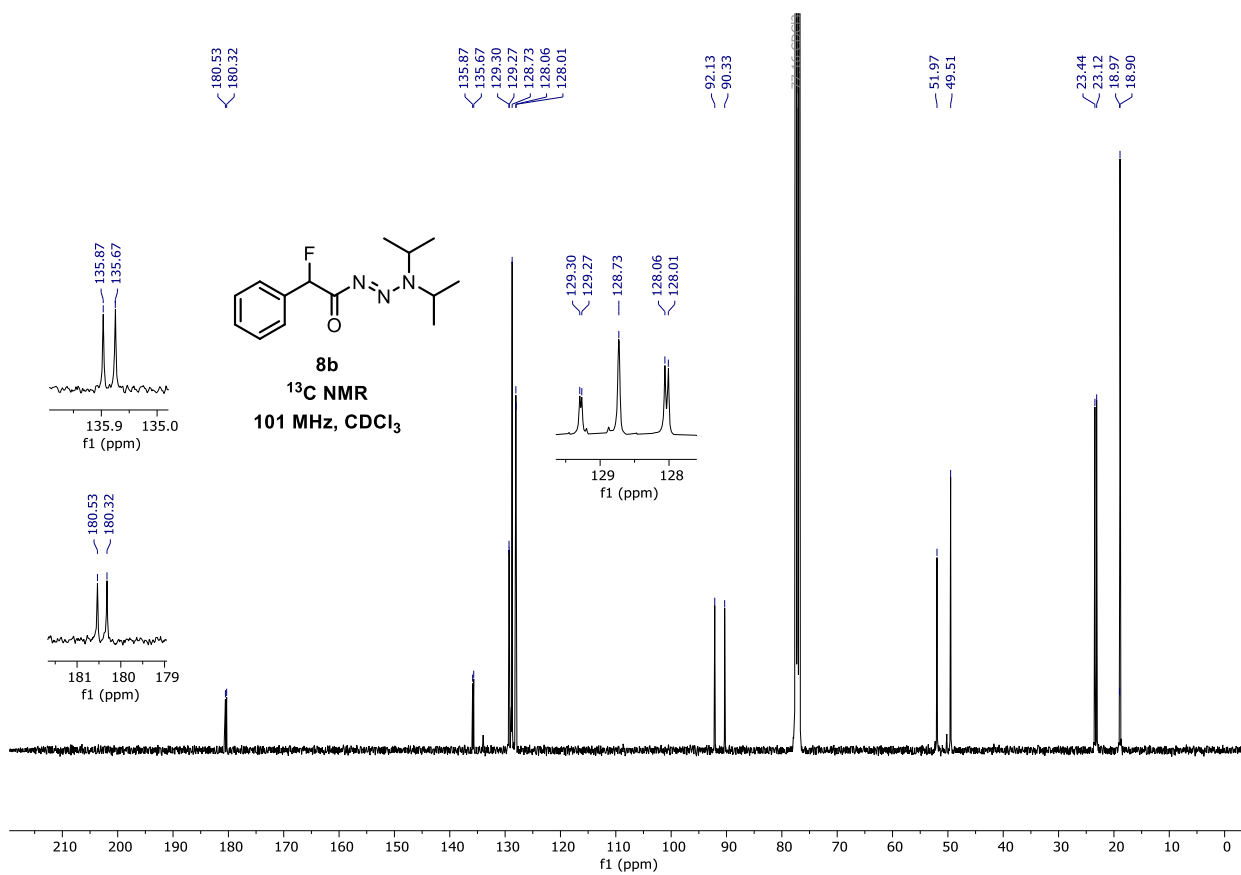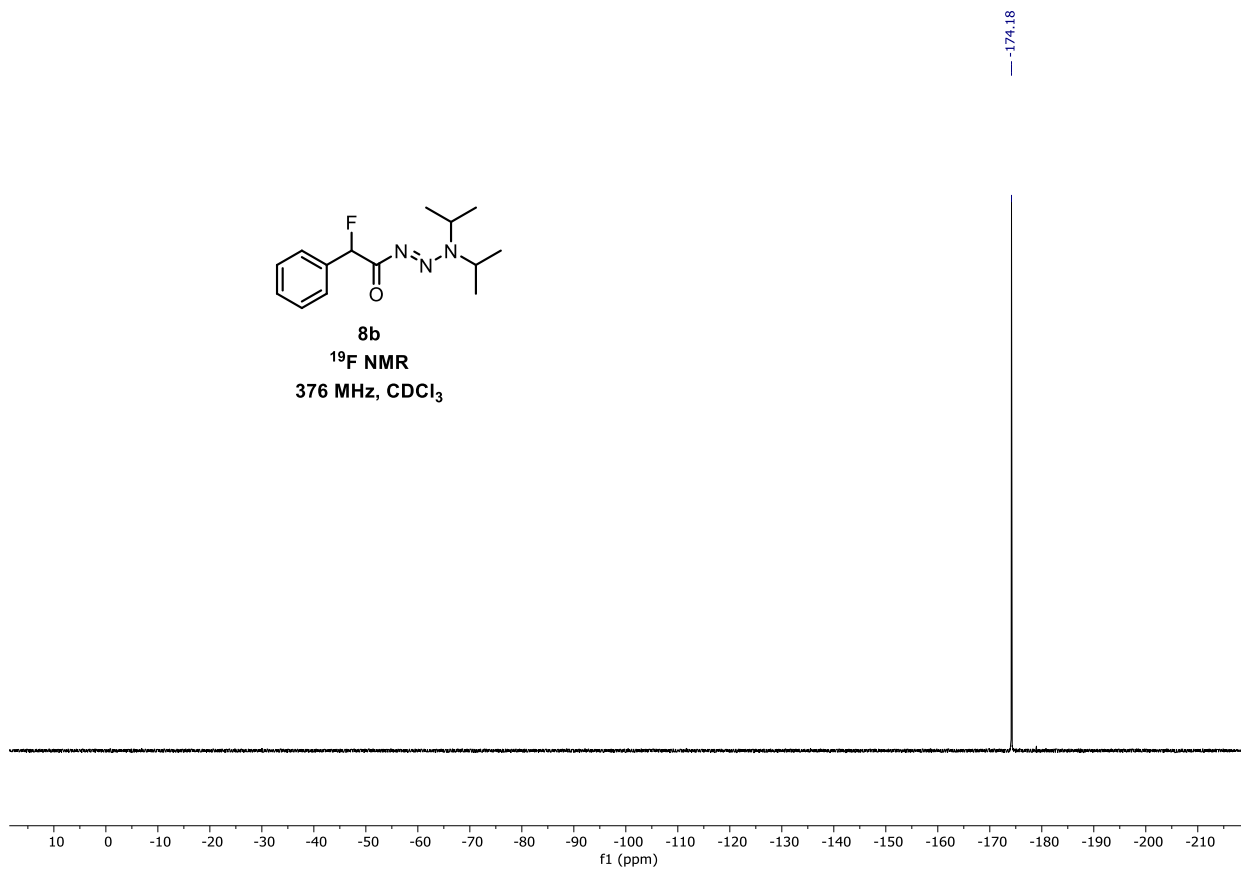

## 10. References:

- (1) G. Kiefer, T. Riedel, P. J. Dyson, R. Scopelliti and K. Severin, *Angew. Chem. Int. Ed.*, 2015, **54**, 302–305; *Angew. Chem.*, 2015, **127**, 306–310.
- (2) J.-F. Tan, C. T. Bormann, F. G. Perrin, F. M. Chadwick, K. Severin and N. Cramer, *J. Am. Chem. Soc.*, 2019, **141**, 10372–10383.
- (3) W. J. Middleton and E. M. Bingham, *J. Org. Chem.*, 1980, **45**, 2883–2887.
- (4) S. Ge, W. Chaładaj and J. F. Hartwig, *J. Am. Chem. Soc.*, 2014, **136**, 4149–4152.
